# Supplementary material for: Impact of a comprehensive prevention programme aimed at reducing incivility and verbal violence against healthcare workers in a French ophthalmic emergency department: an interrupted time-series study
Source: PubMed Central journal article supplement — BMJ Open. 2019 Sep 5;9(9):e031054. doi: 10.1136/bmjopen-2019-031054 (PMC6731840; doi:10.1136/bmjopen-2019-031054), 2019-09-05
Supplement: bmjopen-2019-031054.draft_revisions.pdf [file bmjopen-2019-031054.draft_revisions.pdf]

# BMJ Open

BMJ Open is committed to open peer review. As part of this commitment we make the peer review history of every article we publish publicly available.

When an article is published we post the peer reviewers' comments and the authors' responses online. We also post the versions of the paper that were used during peer review. These are the versions that the peer review comments apply to.

The versions of the paper that follow are the versions that were submitted during the peer review process. They are not the versions of record or the final published versions. They should not be cited or distributed as the published version of this manuscript.

BMJ Open is an open access journal and the full, final, typeset and author-corrected version of record of the manuscript is available on our site with no access controls, subscription charges or pay-per-view fees (<http://bmjopen.bmj.com>).

If you have any questions on BMJ Open's open peer review process please email [info.bmjopen@bmj.com](mailto:info.bmjopen@bmj.com)

# BMJ Open

## Impact of a comprehensive prevention programme aimed at reducing incivility and verbal violence against healthcare workers in an ophthalmic emergency department: an interrupted time-series study.

|                               |                                                                                                                                                                                                                                                                                                                                                                                                                                                                                                                                                                                                                                                                                                                                                                                                                                                                                                                                                                                                               |
|-------------------------------|---------------------------------------------------------------------------------------------------------------------------------------------------------------------------------------------------------------------------------------------------------------------------------------------------------------------------------------------------------------------------------------------------------------------------------------------------------------------------------------------------------------------------------------------------------------------------------------------------------------------------------------------------------------------------------------------------------------------------------------------------------------------------------------------------------------------------------------------------------------------------------------------------------------------------------------------------------------------------------------------------------------|
| Journal:                      | <i>BMJ Open</i>                                                                                                                                                                                                                                                                                                                                                                                                                                                                                                                                                                                                                                                                                                                                                                                                                                                                                                                                                                                               |
| Manuscript ID                 | bmjopen-2019-031054                                                                                                                                                                                                                                                                                                                                                                                                                                                                                                                                                                                                                                                                                                                                                                                                                                                                                                                                                                                           |
| Article Type:                 | Research                                                                                                                                                                                                                                                                                                                                                                                                                                                                                                                                                                                                                                                                                                                                                                                                                                                                                                                                                                                                      |
| Date Submitted by the Author: | 30-Apr-2019                                                                                                                                                                                                                                                                                                                                                                                                                                                                                                                                                                                                                                                                                                                                                                                                                                                                                                                                                                                                   |
| Complete List of Authors:     | Touzet, Sandrine; Hospices Civils de Lyon, Pôle de Santé Publique; Université de Lyon, Laboratoire Health Services and Performance Research (HESPER) EA 7425<br>Ocelli, Pauline; Hospices Civils de Lyon, Pôle de Santé Publique; Université de Lyon, Laboratoire Health Services and Performance Research (HESPER) EA 7425<br>Denis, Angelique; Hospices Civils de Lyon, Pôle de Santé Publique<br>Cornut, Pierre-Loïc; Hospices Civils de Lyon, Hôpital Edouard Herriot, Service d'ophtalmologie<br>Fassier, Jean-Baptiste; Hospices Civils de Lyon, Pôle de Santé Publique; Université de Lyon, UMRESTTE<br>Le-Pogam, Marie-Annick; University Hospital of Lausanne, Institute of Social and Preventive Medicine (IUMSP)<br>Duclos, Antoine; Hospices Civils de Lyon, Pôle de Santé Publique; Université de Lyon, Laboratoire Health Services and Performance Research (HESPER) EA 7425<br>Burillon, Carole; Hospices Civils de Lyon, Hôpital Edouard Herriot, Service d'ophtalmologie; Université de Lyon |
| Keywords:                     | Health services research, Time series study, Health care workers, Violence, ACCIDENT & EMERGENCY MEDICINE                                                                                                                                                                                                                                                                                                                                                                                                                                                                                                                                                                                                                                                                                                                                                                                                                                                                                                     |
|                               |                                                                                                                                                                                                                                                                                                                                                                                                                                                                                                                                                                                                                                                                                                                                                                                                                                                                                                                                                                                                               |

SCHOLARONE™  
Manuscripts

1  
2  
3 TITLE PAGE  
45 **Title of the article:**  
6

7  
8 Impact of a comprehensive prevention programme aimed at reducing incivility and verbal  
9  
10 violence against healthcare workers in an ophthalmic emergency department: an interrupted time-  
11  
12 series study.  
13  
14

15 **Corresponding author**  
1617 Sandrine Touzet  
1819 Hospices Civils de Lyon  
2021 Pôle de Santé Publique  
2223 162 avenue Lacassagne  
2425 69003 Lyon  
2627 France  
2829 sandrine.touzet@chu-lyon.fr  
3031 +33 472 11 51 62  
32  
3334 **Authors**  
35  
3637 Sandrine Touzet\*(1, 2), sandrine.touzet@chu-lyon.fr  
3839 Pauline Occelli (1, 2), pauline.occelli@chu-lyon.fr  
4041 Angelique Denis (1), angelique.denis@chu-lyon.fr  
4243 Pierre-Loïc Cornut (3), dr.cornut@gmail.com  
4445 Jean-Baptiste Fassier (4, 5), jean-baptiste.fassier@chu-lyon.fr  
4647 Marie-Annick Le Pogam (6), marie-annick.le-pogam@chuv.ch  
4849 Antoine Duclos (1, 2), antoine.duclos@chu-lyon.fr  
5051 Carole Burillon (3, 7), carole.burillon@chu-lyon.fr  
5253 The PREVURGO Study Group.  
5455 \*Corresponding author  
56  
57  
58  
59  
60

**The PREVURGO study group:**

Nassira Amamra

Emmanuelle Aubert

Sylvain Beccat

Daniel Betito

Laetitia Bouveret

Philippe Charrier

Dominique Delaunay

Mélanie Dufourneau

André Lecoanet

Philippe Sarnin

Jéromine Sicalac

Sylvie Sullerot

**Institutional addresses**

1. Centre Hospitalier Universitaire de Lyon, Pôle de Santé Publique, Unité de recherche sur les services de santé, Lyon, FR.

2. Université Claude Bernard Lyon 1, Laboratoire HESPER Health Services and Performance Research EA 7425, Lyon, FR.

3. Hospices civils de Lyon, Hôpital Edouard Herriot, Service d'ophtalmologie, Lyon, FR.

4. Centre Hospitalier Universitaire de Lyon, Service de médecine et santé au travail, Lyon, FR.

5. Université Claude Bernard Lyon 1 - Domaine de Rockefeller, UMRESTTE UMR T\_9405, Unité mixte de recherche Epidémiologique et de Surveillance Transport Travail Environnement, Lyon, FR.

6. Institute of Social and Preventive Medicine (IUMSP), Lausanne University Hospital (CHUV), Lausanne, CH.

7. Université Claude Bernard Lyon 1, Villeurbanne, FR.

1  
2  
3  
4  
5  
6  
7  
8  
9  
10  
11  
12  
13  
14  
15  
16  
17  
18  
19  
20  
21  
22  
23  
24  
25  
26  
27  
28  
29  
30  
31  
32  
33  
34  
35  
36  
37  
38  
39  
40  
41  
42  
43  
44  
45  
46  
47  
48  
49  
50  
51  
52  
53  
54  
55  
56  
57  
58  
59  
60

**KEY WORDS**

Health services research; Time series study; Health care workers; Violence.

**WORD COUNT**

4598

For peer review only

**ABSTRACT**

**Objective and setting:** Primary prevention, comprising patient-oriented and environmental interventions, is considered one of the best ways to reduce violence in the emergency department.

We assessed the impact of a comprehensive prevention programme aimed at preventing incivility and verbal violence against healthcare professionals working in the ophthalmology emergency department (OED) of a university hospital.

**Intervention:** The programme was designed to address long waiting times and lack of information, both of which can plague patients. It combined a computerized triage algorithm linked to a waiting room patient call system, signage to assist patients navigate in the OED, educational messages broadcast in the waiting room, presence of a mediator, and a video surveillance.

**Participants:** All patients admitted to the OED and those accompanying them.

**Design:** a single-centre prospective interrupted time-series study over 18 months.

**Primary outcome:** Violent acts self-reported by healthcare workers committed by patients or those accompanying them against healthcare workers.

**Secondary outcomes:** waiting and length of stay.

**Results:** There were a total of 22,107 admissions, including 272 (1.4%) with at least one act of incivility and verbal violence reported by the healthcare workers. Almost all acts of violence were incivility or verbal harassment. The rate of violence significantly decreased from the pre-intervention to the intervention period (24.8; 95%CI: 20.0 to 29.5 to 9.5; 95%CI 8.0 to 10.9 acts per 1000 admissions;  $p < 0.001$ ). An immediate 53% decrease in the violence rate (IRR=0.47, 95%CI: 0.27 to 0.82,  $p = 0.0121$ ) was observed in the first month of the intervention period, after implementation of the triage algorithm.

**Conclusion:** A comprehensive prevention programme targeting patients and environment can reduce self-reported incivility and verbal violence against healthcare workers in an OED.

**Trial registration:** registered at [clinicaltrials.gov](http://clinicaltrials.gov) (identifier: NCT02015884).

## ARTICLE SUMMARY

### Strengths and limitations of this study

- Our comprehensive primary prevention programme integrated components that were environment and patient-oriented (organisational, educational, relational, security).
- A segmented regression was conducted analysis to detect if the programme had a greater effect than an underlying secular trend.
- The primary outcome is self-reported act of violence, which is subjective.
- To limit variation in self-reporting practices, the researchers met monthly with the OED team to discuss the importance of reporting each acts of violence from least (incivility, rudeness) to most severe (assault).
- The generalization of the results is limited by the single-centre study design and by the differences between the OEDs and general emergencies.

## MAIN TEXT

### Introduction

According to the International Labor Office, workplace violence is a frequent phenomenon.<sup>1</sup> Hospital healthcare workers are particularly vulnerable by their exposure to patients who can be agitated and distressed.<sup>2</sup> Around the world, the emergency departments (ED) have been identified as an area of the healthcare sector with a high number of reported violent acts.<sup>3,4,5,6,7,8,9</sup>

Four levels of aggressiveness are distinguished by order of severity by the French National Observatory of Violence in healthcare to describe violent behaviour: incivility (a lack of respect for others that manifests itself as relatively harmless acts), verbal abuse, physical threat (insults, threatening behaviour), and physically violent acts.<sup>10</sup> This violence can have repercussions on the physical and emotional health of the victims, and thus on their well-being and the quality of their work. Healthcare workers have been shown to suffer emotional symptoms similar to post-traumatic stress disorder, job dissatisfaction, and early feelings of burnout, while hospitals have to bear the financial burden of decreased productivity.<sup>11,12,13,14</sup>

In the ED, the frequency of visits observed in recent years has been accompanied by a drastic increase in the waiting times which can lead to a high level of patient dissatisfaction and of aggression towards healthcare workers. Other factors, such as anxiety, boredom, lack of information, lack of understanding of triage categories may also favour violent behaviour.<sup>15,16</sup>

According to the Haddon matrix adapted by Gates *et al.*, interventions to reduce violence in the ED can be categorized according to the time of intervention: before (primary prevention), during (secondary prevention), or after (tertiary prevention) an act of violence; and according to the target of the intervention (healthcare workers, patients or accompanying visitors, and environment).<sup>17,18</sup>

There are several solutions for the prevention of ED violence. Many have concerned primary prevention with interventions aiming at reducing waiting times, managing priorities (implementation of a triage algorithm to manage patients according to the seriousness of the cases), improving



1  
2  
3 signage and patients' understanding of the care pathway.<sup>19,20</sup> Security of premises (security guards,  
4 video surveillance, warning systems, etc.) can sometimes be implemented.<sup>5</sup> Mediator can also be  
5 employed despite no published study evaluating their value. The few studies that have attempted to  
6 evaluate the effectiveness of prevention interventions have a low level of evidence.<sup>18,21</sup>  
7  
8 In the ophthalmology emergency department (OED) of a French university hospital, the healthcare  
9 workers reported the occurrence of acts of incivility and verbal violence, with both medical and  
10 nursing staff demanding that this issue be addressed.<sup>22</sup> The solutions identified to deal with violence  
11 included reducing waiting times, improving the premises (i.e. the comfort of waiting rooms,  
12 confidentiality at the registration desk), changing signage, improving patient information, and  
13 mediation. These components were integrated in a comprehensive primary prevention programme  
14 aimed at averting violence through different components that were environment and patient-  
15 oriented. The aim of this study was to evaluate the impact of this prevention programme on acts of  
16 incivility and verbal violence against healthcare workers in the OED.  
17  
18  
19  
20  
21  
22  
23  
24  
25  
26  
27  
28  
29  
30  
31  
32  
33  
34  
35

## 36 **Methods**

### 37 ***Study design***

38  
39  
40 The study was designed as a single-centre, prospective interrupted time series study. There were  
41 three periods: a 3-month pre-interventional period (from 1 January 2014 until 30 March 2014), a 3-  
42 month training period (from 31 March 2014 until 9 July 2014) and a 12-month implementation  
43 period of the prevention programme (from 10 July 2014 until 30 June 2015); the protocol has been  
44 previously published.<sup>23</sup>  
45  
46  
47  
48  
49  
50

51  
52 *Deviations from the published protocol*<sup>23</sup>: the planned study design was a "on – off" study over 24  
53 months (including a 2-month pre-interventional period and a 22-month intervention period, without  
54 a training period). The first 6 months of the study were not taken into account owing to strong  
55 underreporting of violent acts by the healthcare worker, as ascertained during study coordination  
56  
57  
58  
59  
60

1  
2  
3 meetings. To meet the study schedule, we reduced the duration of the study to 18 months and we  
4  
5 modified the study design. We chose to abandon the “on – off” design because of time constraints  
6  
7 and the low acceptability of the “off” period when the intervention was to be removed.  
8  
9

### 10 ***Patient and Public Involvement***

11  
12  
13 Patients or the public were not involved in this work.  
14

### 15 ***Setting***

16  
17  
18 This study took place at an adult OED of a university hospital located in an urban environment, in the  
19  
20 Rhône-Alpes region of France. The OED is open 24 hours a day, 7 days a week, and handles all types  
21  
22 of medical and surgical ophthalmological emergencies. In 2014, the department treated 20 309  
23  
24 patients with 68 admissions a day on average.  
25  
26

### 27 ***Participants***

#### 28 ***Patients and those accompanying them***

29  
30  
31 All patients (adults and children) registering at the OED from 1 January 2014 to 30 June 2015 were  
32  
33 included. Those accompanying the patient (family, friends, etc.) were also enrolled. Patients  
34  
35 registering during weekends and public holidays were excluded owing to the organisational  
36  
37 characteristics of these periods (i.e. different and fewer staff as compared to weekdays), as were  
38  
39 those registering during the 3-month training period from 31 March 2014 to 9 July 2014.  
40  
41  
42

#### 43 ***Healthcare workers***

44  
45  
46 The OED team (seven nurses, six ward aides, two orthoptic students, seven residents in  
47  
48 ophthalmology, four senior ophthalmologists) operating on a rotating schedule to provide care 24/7  
49  
50 were enrolled in the study. The OED team present during a week day is composed of four nurses,  
51  
52 four ward aides, two orthoptic students, one or two residents in ophthalmology, and one on-call  
53  
54 senior ophthalmologist; this did not change over the study period. Four admitting clerks were also  
55  
56 enrolled.  
57  
58  
59  
60

## ***Prevention programme***

### *Programme elaboration*

The OED team partnered with researchers to develop the comprehensive prevention programme.

The programme had five complementary components, identified through a literature review, that were added progressively:

- An organisational component (A), beginning 30 March 2014, with the use by reception nurses of a computerized triage algorithm. This algorithm made it possible to prioritize patients as soon as they arrived in the unit and to carry out initial examinations (such as dilatation of the pupils by the orthoptist) according to the patient's reason for presentation to the OED. It was linked to a waiting room patient call system. A 3-month phase of training to use of the algorithm was conducted for reception nurses (named "training period"). This training period was not planned in the published protocol.<sup>24</sup>
- An environmental component (B) and educational component (C) beginning 6 October 2014 were combined. The environmental component was signage to help patients navigate within the OED. The educational component was messages about the OED team and its activity, the care pathway, the patients' order of passage according to severity, and information on the waiting time range that were broadcast on TV in the waiting rooms to patients. As both components addressed difficulties for the patients to understand the functioning of the OED, we considered it appropriate to combine them. This is a deviation from the initial protocol.<sup>23</sup>
- A relational component (D) beginning 5 January 2015 with the presence of a mediator in the OED, for preventive mediation actions. The mediator held a master's degree in mediation, and was recruited as part of the project. The mediator was to intervene when patients showed signs of impatience or nervousness and in case of conflict involving a patient or visitor. The mediator circulated through corridors and waiting rooms, and was available to patients and visitors.

1  
2  
3 - A security component (E) beginning 6 April 2015, with the implementation of video surveillance  
4 cameras throughout the OED (admissions desk, corridors) connected to the hospital security control  
5  
6  
7 room.  
8

### 9 *Programme implementation*

10  
11 The prevention programme was implemented in four steps of three months period, after a 3-month  
12 training period for the computerized triage algorithm (Figure 1). The study project manager  
13  
14 conducted monthly visits to the OED during the intervention period to ensure programme  
15  
16  
17 implementation.  
18  
19

### 20 **Outcomes**

21  
22 *The primary outcome* was violence committed by patients or those accompanying them against  
23  
24 healthcare workers or against other patients and those accompanying them among all admissions to  
25  
26  
27 the OED.  
28

29  
30 Violence was reported by healthcare workers. They could report incidents directly committed against  
31  
32 them or against patients and those accompanying them. Violence was described using a classification  
33  
34 that distinguishes four levels, from least (incivility) to most severe (assault), based on the French  
35  
36 National Observatory of Violence in healthcare (Table 1).<sup>23</sup> Clinical cases were used monthly to train  
37  
38 professionals to identify the different types of acts of violence to be reported and their level of  
39  
40 severity (see table 1 for examples). They were developed from situations experienced by OED  
41  
42 professionals. These situations were identified during interviews with OED professionals conducted  
43  
44 by the researchers prior to the initiation of the study.<sup>22</sup> The aim was to reduce the variability in the  
45  
46 classification of events.  
47  
48

49  
50 The project manager also met monthly with the OED team to discuss the importance of reporting  
51  
52 events to limit under-reporting of acts violence.  
53

54  
55 *Secondary outcomes* were waiting time (defined as the interval of time between the administrative  
56  
57 registration of the patient and the assessment by a nurse or an ophthalmologist) and length of stay  
58  
59  
60

1  
2  
3  
4  
5  
6  
7  
8  
9  
10  
11  
12  
13  
14  
15  
16  
17  
18  
19  
20  
21  
22  
23  
24  
25  
26  
27  
28  
29  
30  
31  
32  
33  
34  
35  
36  
37  
38  
39  
40  
41  
42  
43  
44  
45  
46  
47  
48  
49  
50  
51  
52  
53  
54  
55  
56  
57  
58  
59  
60

(defined as the interval of time between registration and discharge). This information was routinely collected at the OED for all inpatients.

For peer review only

**Table 1. Four levels of violence, from least to most severe according to the National Observatory of Violence in Hospitals and examples of clinical cases used to train healthcare workers.**

|                                |                                                                                                                                                                                                                                                                                                                                                                                                                                                                                  |
|--------------------------------|----------------------------------------------------------------------------------------------------------------------------------------------------------------------------------------------------------------------------------------------------------------------------------------------------------------------------------------------------------------------------------------------------------------------------------------------------------------------------------|
| Level 1<br>(incivility)        | <p>Insistent questions, incivility, rudeness, occupation of the corridor, spitting, making noise (telephone, etc.)</p> <p>Examples:</p> <ul style="list-style-type: none"> <li>- A patient (or an accompanying person) opens the door of the nursing office without knocking, or waiting for an answer, and calls you for some reason.</li> <li>- A patient (or an accompanying person) considering that everyone comes before him comes to show his dissatisfaction.</li> </ul> |
| Level 2<br>(verbal harassment) | <p>Insult or verbal abuse without threat</p> <p>Examples:</p> <ul style="list-style-type: none"> <li>- A patient (or an accompanying person), dissatisfied with your answer, calls you an asshole.</li> <li>- A patient (or an accompanying person), tired of waiting, calls you a loser or incapable.</li> </ul>                                                                                                                                                                |
| Level 3<br>(threats)           | <p>Verbal or physical threat.</p> <p>Examples:</p> <ul style="list-style-type: none"> <li>- A patient (or an accompanying person) raises his hand on you.</li> <li>- A patient (or an accompanying person) comes dangerously close to you to scream on you.</li> </ul>                                                                                                                                                                                                           |
| Level 4                        | <p>Intentional violence, assault, vandalism or damage to equipment.</p>                                                                                                                                                                                                                                                                                                                                                                                                          |

1  
2  
3 (assaults)

Examples:

4  
5 - An angry patient (or an accompanying person) pushes you.

6  
7 - A patient (or an accompanying person) spits on you.  
8

9  
10 

---

Legend. Examples come from clinical cases used to train the healthcare workers to notify the level any incivility or violence they may be subject.  
11

12  
13  
14  
15  
16  
17  
18  
19  
20  
21  
22  
23  
24  
25  
26  
27  
28  
29  
30  
31  
32  
33  
34  
35  
36  
37  
38  
39  
40  
41  
42  
43  
44  
45  
46

For peer review only

### **Blinding**

Healthcare workers and patients were not blinded to the intervention phase. However, in the absence of individual information on the study (this was not required by the Institutional Review Board), it appears unlikely that patient behaviour was influenced by the study.

### **Sample size**

In the initial protocol the sample size was determined for an on – off design by the expected efficacy of each of the five components of the prevention programme. The statistical unit was the patient admitted to the OED. Based on the initial hypotheses, the total sample size required was 30 224 admissions with a risk alpha of 5% and the statistical power of 80%. We did not recalculate the number of subjects required; there is usually no estimation of the sample size in interrupted time-series studies.<sup>24,25</sup>

### **Statistical methods**

The analyses were conducted on data obtained during the 15-month study period (that corresponded to the pre-intervention and intervention periods and without consideration of the training period). Descriptive statistics were used to summarize and compare characteristics of patients admitted to the OED and violence outcomes during the pre-intervention and intervention periods. The proportion of admissions with violence committed by patients, or those accompanying them, was expressed as a rate per 1000 admissions. When the perpetrator was someone accompanying the patient, the violence was attributed to the patient.

For all outcomes, we conducted a pre post analysis to compare rates before and during implementation of the prevention programme using chi square tests. In addition, for the primary outcome we performed a segmented regression analysis to account for the possibility of concurrent secular trends in violence which could influence the results. We evaluated the effect of the programme on violence at both the aggregate and individual patient levels.



1  
2  
3 First, a segmented Poisson regression model offset by the total number of admissions at OED per  
4  
5 month was used to compare monthly violence rates between pre and intervention periods. The  
6  
7 model included intercept, time trend before implementation (*time*), change in level immediately  
8  
9 after the training period (*programme*), and change in time trend after the training period  
10  
11 (*time\_after\_programme*).  
12

13  
14 Further stratified analysis was conducted to investigate whether changes in violence rates varied by  
15  
16 age group, gender, waiting time and length of stay. Results were reported as incidence rate ratio  
17  
18 (IRR) and 95% confidence intervals (CIs).  
19

20  
21 Secondly, we used piecewise logistic regression model to test for changes in monthly effects of each  
22  
23 intervention on odds of violence occurrence within admission at OED after adjusting for individual  
24  
25 characteristics (age, gender, waiting time >2h, admission to OED during public holidays, night  
26  
27 admission, patients with several admissions to OED). A model with generalized equation estimation  
28  
29 with a 1<sup>st</sup> order autoregressive correlation structure was fitted to account for the clustering of  
30  
31 admissions to the OED within a calendar day. The full piecewise logistic regression model included  
32  
33 both a change in level and a change in trend for each of the 4 components (A, BC, D and E). After  
34  
35 backward stepwise selection, only parameters with  $p < 0.05$  were retained in the parsimonious model.  
36  
37 Estimates of levels and post-implementation slopes were reported as odds ratio (OR) and 95% CIs.  
38  
39 All admissions to the OED were treated independently. All  $p$  values were 2-sided and statistical  
40  
41 significance was defined as a  $p$  value of less than 0.05. Statistical analyses were performed with SAS  
42  
43 version 9.4 software (SAS Institute Inc., Cary, NC, USA).  
44  
45  
46  
47  
48  
49  
50

## 51 **Results**

### 52 ***Participants***

53  
54 Over the 15-month study period, 22 107 admissions (corresponding to 18 826 patients) were  
55  
56 analysed (Figure 1). Among the 18 826 patients, 12% were admitted more than once. The mean  $\pm$   
57  
58  
59  
60

1  
2  
3 standard deviation (SD) number of visits per patient was  $1.2 \pm 0.6$  (range: 1-15), there was a mean 70  
4  
5  $\pm 12$  admissions per day over the 315-day study period (range: 33-105).  
6  
7

### 8 ***Characteristics of admissions***

9

10  
11 Characteristics of admissions according to the components implemented are presented in Table 2.  
12  
13  
14  
15  
16  
17  
18  
19  
20  
21  
22  
23  
24  
25  
26  
27  
28  
29  
30  
31  
32  
33  
34  
35  
36  
37  
38  
39  
40  
41  
42  
43  
44  
45  
46  
47  
48  
49  
50  
51  
52  
53  
54  
55  
56  
57  
58  
59  
60

For peer review only

**Table 2. Characteristics of admissions, waiting time and length of stay.**

|                                        | Pre-intervention<br>period<br>N=4 118 | Intervention period |                 |                  |                   |
|----------------------------------------|---------------------------------------|---------------------|-----------------|------------------|-------------------|
|                                        |                                       | A<br>N=4 403        | A+BC<br>N=4 587 | ABC+D<br>N=4 454 | ABCD+E<br>N=4 545 |
| Male, n (%)                            | 2 250 (54.6)                          | 2 335 (53.0)        | 2 499 (54.5)    | 2 426 (54.5)     | 2 564 (56.4)      |
| Age ≥ 40 years, n (%)                  | 2 159 (52.4)                          | 2 547 (57.8)        | 2 452 (53.5)    | 2 368 (53.2)     | 2 459 (54.1)      |
| Coming during the day, n (%)           | 2 944 (71.5)                          | 3 164 (71.9)        | 3 536 (77.1)    | 3 519 (79.0)     | 3 324 (73.1)      |
| Waiting time > 2h <sup>a</sup> , n (%) | 2 755 (66.9)                          | 2 754 (62.5)        | 2 377 (51.8)    | 2 100 (47.1)     | 2 125 (46.8)      |
| Length of stay > 3h, n (%)             | 2 045 (49.7)                          | 2 481 (56.3)        | 2 002 (43.6)    | 1 601 (35.9)     | 1 595 (35.1)      |

Legend: Coming during the day corresponded to admission between 8 am and 7.59 pm; waiting time was defined as the duration between time of registration of patient's arrival and first time of assessment by a nurse or an ophthalmologist; Length of stay was defined as the duration between registration and discharge. Components: A corresponded to computerized triage algorithm, BC corresponded to signage and messages broadcast, D corresponded to mediator and E corresponded to video surveillance.

<sup>a</sup> waiting time was not documented for 108 admissions.

### **Outcomes**

A total of 376 acts of violence corresponding to 272 admissions (1.4% of 22 107 admissions) were recorded during the total study period (Table 3). Among the 272 admissions concerned, 74% (n=202) had led to one act of violence, 16% (n=45) had led to two acts, and 10% (n=25) had led to three or more acts. In the pre-intervention period, 98.6% acts of violence were incivility or verbal harassment and 1.4% were threats. In the intervention period, all acts of violence were incivility or verbal harassment.

For peer review only

**Table 3. Characteristics of acts of violence reported by healthcare workers.**

|                                                      | Pre-intervention<br>period<br>N=4 118 | Intervention period after a 3-month training |                 |                  |                   |
|------------------------------------------------------|---------------------------------------|----------------------------------------------|-----------------|------------------|-------------------|
|                                                      |                                       | A<br>N=4 403                                 | A+BC<br>N=4 587 | ABC+D<br>N=4 454 | ABCD+E<br>N=4 545 |
| Rate of act of violence per 1000 admissions (95%CI)* | 24.8 (20.0-29.5)                      | 10.0 (7.1-12.9)                              | 8.9 (6.2-11.7)  | 8.1 (5.5-10.7)   | 10.8 (7.8-13.8)   |
| Act of violence**, n                                 | 143                                   | 54                                           | 51              | 56               | 72                |
| Level of violence, n (%)                             |                                       |                                              |                 |                  |                   |
| Level 1 (incivility)                                 | 131 (91.6)                            | 46 (85.2)                                    | 45 (88.2)       | 43 (76.8)        | 65 (90.3)         |
| Level 2 (verbal harassment)                          | 10 (7.0)                              | 7 (13.0)                                     | 5 (9.8)         | 13 (23.2)        | 7 (9.7)           |
| Level 3 (threats)                                    | 2 (1.4)                               | 1 (1.9)                                      | 1 (2.0)         | 0 (0)            | 0 (0)             |
| Level 4 (assaults)                                   | 0 (0)                                 | 0 (0)                                        | 0 (0)           | 0 (0)            | 0 (0)             |
| Committed by patient, n (%)                          | 98 (68.5)                             | 43 (79.6)                                    | 35 (68.6)       | 38 (67.9)        | 53 (73.6)         |
| Healthcare worker as the victim***, n (%)            | 140 (97.9)                            | 51 (94.4)                                    | 48 (94.1)       | 54 (96.4)        | 72 (100)          |

\* Rate of act of violence was defined as the percentage of admissions per period with at least one act of violence reported.

1  
2  
3 \*\* Several acts of violence could be occurred per admission.  
4

5 \*\*\* 6 acts of violence were committed between patients and the victim was not documented for 5 acts of violence.  
6

7  
8 Components: A corresponded to computerized triage algorithm, BC corresponded to signage and messages broadcast, D corresponded to mediator and E  
9  
10 corresponded to video surveillance cameras.

11  
12 Abbreviation: CI: Confidence Interval.  
13  
14  
15  
16  
17  
18  
19  
20  
21  
22  
23  
24  
25  
26  
27  
28  
29  
30  
31  
32  
33  
34  
35  
36  
37  
38  
39  
40  
41  
42  
43  
44  
45  
46

For peer review only

### *Primary outcome*

The rate of violence significantly decreased from 24.8 (95%CI: 20.0 to 29.5) admissions with violence per 1000 admissions in pre-intervention period to 9.5 (95%CI: 8.0 to 10.9) acts of violence per 1000 admissions in intervention period ( $p<0.001$ ). The effects of the components on monthly violence rates are presented in Figure 2.

### *Secondary outcomes*

The frequency of admissions with waiting times  $\geq 2$  hours decreased from 67% ( $n=2755$  admissions) to 52% ( $n=9356$ ) between the pre-intervention period and the intervention period ( $p<10^{-3}$ ). For the length of stay, frequency of admissions with a stay  $\geq 3$  hours decreased from 50% ( $n=2045$ ) to 43% ( $n=7679$ ;  $p<10^{-3}$ ).

### *Segmented regression analysis*

According to the Poisson regression analyses, no pre-intervention trend was seen in monthly violence rates (IRR=1.13, 95%CI: 0.87 to 1.46,  $p=0.3243$ ). After accounting for underlying trends, an immediate 53% decrease (IRR=0.47, 95%CI: 0.27 to 0.82,  $p=0.0121$ ) was observed in the violence rate of the first month following the training period. No monthly trend effects in overall intervention period was detected (IRR=0.97, 95%CI: 0.92 to 1.02,  $p=0.1660$ ). Poisson regression results stratified by admission's characteristics are presented in a table 4. Following the training period, a similar immediate decrease was found for female (IRR=0.35, 95%CI: 0.15 to 0.83,  $p=0.0212$ ), age  $<40$  years (IRR=0.43, 95%CI: 0.19 to 0.99,  $p=0.0471$ ), waiting time  $>2$  hours (IRR=0.49, 95%CI: 0.26 to 0.92,  $p=0.0306$ ), and length of stay  $>3$  hours (IRR=0.38, 95%CI: 0.20 to 0.74,  $p=0.0089$ ). No monthly trend effect in the intervention period was observed for all subgroups.

**Table 4. Multivariate analysis\* of the comprehensive prevention programme on violence rates by admissions characteristics.**

| Characteristics | Pre-intervention trend<br>(per month)** |         | Change in level*** |         | Change in trend<br>(per month)**** |         |
|-----------------|-----------------------------------------|---------|--------------------|---------|------------------------------------|---------|
|                 | IRR [95%CI]                             | p-value | IRR [95%CI]        | p-value | IRR [95%CI]                        | p-value |
| Sex             |                                         |         |                    |         |                                    |         |
| Male            | 1.05 [0.76;1.46]                        | 0.7500  | 0.59 [0.28;1.20]   | 0.1308  | 0.95 [0.89;1.01]                   | 0.0810  |
| Female          | 1.27 [0.84;1.93]                        | 0.2343  | 0.35 [0.15;0.83]   | 0.0212  | 1.00 [0.93;1.07]                   | 0.9548  |
| Age             |                                         |         |                    |         |                                    |         |
| <40 yrs         | 1.11 [0.78;1.58]                        | 0.5292  | 0.43 [0.19;0.99]   | 0.0471  | 0.96 [0.90;1.04]                   | 0.2771  |
| ≥ 40 yrs        | 1.16 [0.79;1.69]                        | 0.4107  | 0.51 [0.24;1.08]   | 0.0730  | 0.97 [0.92;1.04]                   | 0.3601  |
| Waiting time    |                                         |         |                    |         |                                    |         |
| ≤2h             | 1.11 [0.67;1.85]                        | 0.6468  | 0.39 [0.13;1.18]   | 0.0892  | 0.96 [0.88;1.05]                   | 0.3427  |
| >2h             | 1.12 [0.83;1.51]                        | 0.4233  | 0.49 [0.26;0.92]   | 0.0306  | 0.99 [0.94;1.04]                   | 0.6704  |
| Length of stay  |                                         |         |                    |         |                                    |         |
| ≤3h             | 1.03 [0.66;1.62]                        | 0.8738  | 0.57 [0.22;1.51]   | 0.2329  | 0.96 [0.89;1.04]                   | 0.2823  |
| >3h             | 1.13 [0.82;1.55]                        | 0.4231  | 0.38 [0.20;0.74]   | 0.0089  | 1.00 [0.94;1.06]                   | 0.9764  |

Abbreviations: IRR: Incidence rate ratio, CI: Confidence interval.



1  
2  
3 \* segmented Poisson regression offset by the total number of admissions at OED per month. RR <1 represents a decline and inversely

4  
5 RR>1 represents an increase in monthly violence rate.

6  
7 \*\* rate of change in monthly violence rate prior the intervention (i.e. time effect).

8  
9 \*\*\* immediate change in the mean monthly violence rate from pre intervention to intervention period.

10  
11 \*\*\*\* change in slope per month following to the intervention period.  
12  
13  
14  
15  
16  
17  
18  
19  
20  
21  
22  
23  
24  
25  
26  
27  
28  
29  
30  
31  
32  
33  
34  
35  
36  
37  
38  
39  
40  
41  
42  
43  
44  
45  
46

### *Piecewise logistic regression analysis*

Piecewise logistic regression analysis confirmed the absence of pre-intervention trend (see table 5).

Following the training period, three components of the programme had significant effects on the underlying trend of violence occurrence. There was a significant decline in the odds of violence occurrence over time after the implementation of component A-Algorithm (adjusted odds ratio [aOR]= 0.87, 95%CI: 0.82-0.91,  $p<10^{-3}$ ). The trend toward decreasing occurrence of violence over time significantly reversed in the 3 months following the implementation of component D-Mediators (aOR= 1.45, 95%CI: 1.14-1.84,  $p=0.002$ ) indicating a significant increase over time after the implementation of a mediator. The trend significantly reversed following component E- video surveillance (aOR= 0.65, 95%CI: 0.45-0.93,  $p=0.019$ ) suggesting that the magnitude of increase in occurrence of violence decreased over time and returned at its previous level (aOR= 0.84, 95%CI: 0.66-1.07,  $p=0.152$ ). No effect was observed for the component BC combining signage and messages broadcast on TV in the waiting rooms.

**Table 5. Piecewise logistic regression analysis of the comprehensive prevention programme effects\* on violence.**

|                                         | Full model**        |         | Simple model***    |         |
|-----------------------------------------|---------------------|---------|--------------------|---------|
|                                         | OR [95%CI]          | p-value | OR [95%CI]         | p-value |
| Trend prior to intervention (per month) | 1.09 [0.81 ; 1.49]  | 0.5848  | --                 | --      |
| Immediate change in level:              |                     |         |                    |         |
| A                                       | 0.31 [0.03 ; 3.20]  | 0.3236  | --                 | --      |
| BC added to A                           | 2.19 [0.70 ; 6.82]  | 0.1773  | --                 | --      |
| D added to ABC                          | 1.05 [0.28 ; 3.88]  | 0.9406  | --                 | --      |
| E added to ABCD                         | 5.73 [2.08 ; 15.77] | 0.0007  | --                 | --      |
| Change in trend (per month):            |                     |         |                    |         |
| A                                       | 0.95 [0.55 ; 1.65]  | 0.8657  | 0.87 [0.82 ; 0.92] | <.0001  |
| BC added at A                           | 0.61 [0.33 ; 1.13]  | 0.1188  | --                 | --      |
| D added at ABC                          | 1.85 [0.98 ; 3.48]  | 0.0572  | 1.45 [1.14 ; 1.84] | 0.0022  |
| E added at ABCD                         | 0.35 [0.17 ; 0.70]  | 0.0031  | 0.65 [0.45 ; 0.93] | 0.0194  |

Abbreviations: OR: odds ratio, CI: Confidence interval.

Components: A corresponded to computerized triage algorithm, BC corresponded to signage and messages broadcast on TV in the waiting rooms, D corresponded to mediator and E corresponded to video surveillance cameras.

1  
2  
3 \*logistic generalized estimating equation model adjusted for waiting time > 2h. OR <1 represent a decline and inversely OR>1 represent an increase in  
4  
5 monthly likelihood of violence occurrence during admission at OED per month.  
6

7  
8 \*\*full model included time effect and immediate changes after each component's implementation and changes in slopes.  
9

10 \*\*\*parsimonious model after backward selection.  
11  
12  
13  
14  
15  
16  
17  
18  
19  
20  
21  
22  
23  
24  
25  
26  
27  
28  
29  
30  
31  
32  
33  
34  
35  
36  
37  
38  
39  
40  
41  
42  
43  
44  
45  
46

For peer review only

## Discussion

The present study found a significant reduction in self-reported incivility or verbal violence by healthcare workers following the implementation of a comprehensive prevention programme. This reduction occurred after the implementation of the first component of the programme, a triage algorithm, and was maintained over time while other components were successively implemented. The violence rate during the pre-intervention period found in the present study (24.8 per 1000 admissions) was higher than that reported in a recent meta-analysis of 22 studies; the authors found a pooled incidence of 36 per 10,000 admissions (range: 1 to 172 per 10,000 admissions).<sup>26</sup> It is, however, difficult to compare the results of the present study with those reported elsewhere due to heterogeneity in the way violence is defined, collected and reported in the literature; for a majority of studies, data collection was conducted retrospectively, using security records and incident report documents that mainly report severe acts of violence.<sup>26</sup>

Previous studies reported a low rate of acts of violence with a high level of severity (threats and assaults).<sup>27,28</sup> In the present study, the frequency of such acts were even lower; only four acts of verbal or physical threat and no assault. This can be explained by the context of the OED which did not admit patients for drug/alcohol abuse or psychiatric disease. However, as in other studies, verbal harassment or incivility committed by patients were the most frequent form of violence experienced herein despite differences in methodology.<sup>28,29,30</sup> Concomitantly, waiting times and length of stay of patients in the OED were significantly reduced. The reduction of waiting times was an expected effect of the triage algorithm, which allowed, according to the reason for consultation, for orthoptists to perform examinations such as dilating pupils without having to consult a physician. It was not related to a change in the number of professionals (which remained stable throughout the study) nor to a change in the number of admissions to OED.

1  
2  
3 As recommended, the prevention programme combined different components, targeting regularly  
4 cited causes of violence.<sup>18</sup> The intervention targeted patients/visitors and the environment, but did  
5 not target how OED professionals handle violent situations.<sup>31,30</sup> Behaviour of healthcare professionals  
6 such as empathic communication, early proactive interaction, and verbal and body language  
7 expressing respect and confidence are associated with a reduction in incivility and verbal abuse or  
8 aggressive behaviour.<sup>22,32</sup>

9  
10 Caution should, however, be taken when interpreting the results of the present study. For instance, a  
11 positive effect was observed during the implementation of the first component (triage algorithm). It  
12 is not possible to conclude whether this effect was due to the algorithm or to the fact that it was  
13 implemented first. Another point to consider is that violence increased despite the presence of the  
14 mediator. To the best of our knowledge, there was no change in the conditions of patient reception  
15 (i.e. no increase in waiting times or in admission frequency and no change in the OED team) during  
16 the implementation of the mediator that could explain this unintended effect. The mediator, by  
17 his/her presence, may have stimulated the declaration of violence by healthcare workers. This  
18 phenomenon point out the difficulty to collect non-physical acts of violence which are underreported  
19 by healthcare staff, primarily due to the fact that it is so prevalent yet rarely results in physical injury  
20 and because . Most of professionals consider it as part of their jobs and these acts of violence are  
21 subject to personal interpretation.<sup>33,34</sup> To limit variation in reporting practices, the researchers met  
22 monthly with the OED team to discuss the importance of reporting events from least (incivility) to  
23 most severe (assault).

24  
25 Moreover, we conducted a segmented regression analysis to detect if the programme had a greater  
26 effect than an underlying secular trend.<sup>35,36,37,24,25</sup> The analysis is limited by the short pre-intervention  
27 phase, which does not allow a solid estimation of the trend before the programme implementation.  
28 Second, the generalization of the results is limited by the single-centre study design and by the  
29 differences between the OEDs and general emergencies. In particular, there are no admissions for  
30 psychiatric or drug abuse and alcohol problems, which are known to be sources of violence.<sup>26</sup>

1  
2  
3 A qualitative approach would have allowed to better understand the mechanisms of action of the  
4 programme components,<sup>38</sup> in particular the paradoxical effect of the mediator. It also would have  
5 allowed us to evaluate whether the coping of the healthcare workers with the violence has  
6 improved.  
7  
8  
9  
10

11  
12 In conclusion, a comprehensive prevention programme targeting patients, visitors and environment  
13 can reduce self-reported incivility and verbal violence by healthcare workers in an OED over 12  
14 months. EDs should develop comprehensive primary prevention programme that integrate various  
15 environmental and patient-oriented components (organisational, educational, relational, security).  
16  
17  
18  
19  
20  
21  
22  
23  
24  
25  
26  
27  
28  
29  
30  
31  
32  
33  
34  
35  
36  
37  
38  
39  
40  
41  
42  
43  
44  
45  
46  
47  
48  
49  
50  
51  
52  
53  
54  
55  
56  
57  
58  
59  
60

### Reporting criteria

We followed the SQUIRE criteria from the EQUATOR network to report the study.

### Ethics approval

The Sud Est IV Institutional Review Board's approval was obtained in September 2011 (L11-117).

Under French law in effect at the time of the study, consent was not required for the type of study and intervention being evaluated.

### Author contributions

The study was conceptualized and designed by ST, PLC, MALP, and ADu.

PLC and CB are the Co-Chief Investigators, provided leadership for the project.

ST, PLC, JBF, and ADu contributed to the development of the programme.

ST, PO, and ADe planned the statistical analysis.

ADe carried out the statistical analyses.

ST, PO, and ADe drafted the manuscript.

All authors reviewed the draft version, made suggestions, and approved the final version.

### Funding

This study was supported by a grant from the Programme de Recherche en Qualité Hospitalière 2011 (PRQH 2011- D50794) of the French ministry of health (Ministère chargé de la Santé, Direction de l'Hospitalisation et de l'Organisation des Soins). The funder had no role in study design, data collection, data analysis, decision to publish, or writing of the manuscript.

### Acknowledgments

We thank the OED team. We also acknowledge the hard work and the active support of Sylvie Sullerot, advance practice nurse of the OED, Daniel Betito, computer scientist, for the implementation of the algorithm in the hospital information system, Hélène Janin-Magnificat, physician, for her support of the study and the students of the communication school of Lyon for the creation of the messages broadcast on TV in the waiting rooms.

The authors are grateful to Philip Robinson for help in manuscript preparation.



### Competing Interests

None declared.

### Patient consent

Not required.

### Data statement

The data set is not available as ethics approval does not allow release.

### Figures

#### Figure 1. Study flow chart of admissions at Ophthalmology Emergency Department.

Legend: Components: A: computerised triage algorithm, BC: signage and messages broadcast on TV in the waiting rooms, D: mediator, E: video surveillance.

#### Figure 2. Observed time series of the A) rates of admission at OED with acts of violence, B) total number of admissions at OED and C) rates of admissions with waiting time greater than 2 hours by month before and during implementation of the prevention programme.

Abbreviation: OED: Ophthalmology Emergency Department

Legend: the grey band represents the 3-month training period. The dotted lines inside the scatter plots represents the implementation of component A (computerised triage algorithm), component BC (signage and messages broadcast on TV in the waiting rooms), component D (mediator) and component E (video surveillance).

## References

---

<sup>1</sup> Bureau of Labor Statistics. News release: Nonfatal occupational injuries and illnesses requiring days away from work. United State Department of Labor (USDL 15-2205). Last Modified Date: November 10, 2016. Retrieved from <http://www.bls.gov/news.release/pdf/osh2.pdf>. Accessed May 26, 2018.

<sup>2</sup> Kuehn BM. Violence in health care settings on rise. *JAMA* 2010;304:511–2.

<sup>3</sup> Lau JB, Magarey J, McCutcheon H. Violence in the emergency department: a literature review. *Aust Emerg Nurs J* 2004;7:27–37.

<sup>4</sup> Gates DM, Ross CS, McQueen L. Violence against emergency department workers. *J Emerg Med* 2006;31:331–7.

<sup>5</sup> Kowalenko T, Cunningham R, Sachs CJ, et al. Workplace violence in emergency medicine: current knowledge and future directions. *J Emerg Med* 2012;43:523–31.

<sup>6</sup> Winstanley S, Whittington R. Aggression towards health care staff in a UK general hospital: variation among professions and departments. *J Clin Nurs* 2004;13:3–10.

<sup>7</sup> Ryan D, Maguire J. Aggression and violence - a problem in Irish Accident and Emergency departments? *J Nurs Manag* 2006, 14:106–15.

<sup>8</sup> Crilly J, Chaboyer W, Creedy D: Violence towards emergency department nurses by patients. *Accid Emerg Nurs* 2003, 12:67–73.

<sup>9</sup> Behnam M, Tillotson RD, Davis SM, et al. Violence in the emergency department: a national survey of emergency medicine residences and attending physicians. *J Emerg Med* 2011;40:565–79.

<sup>10</sup> Observatoire National des Violences en milieu de Santé. La prévention des atteintes aux personnes et aux biens en milieu de santé. Guide méthodologique. Ed. Direction Générale de l'Offre de Soins. Avril 2017. 108 p. Available at: [http://solidarites-sante.gouv.fr/IMG/pdf/guide\\_onvs\\_-\\_prevention\\_atteintes\\_aux\\_personnes\\_et\\_aux\\_biens\\_2017-04-27.pdf](http://solidarites-sante.gouv.fr/IMG/pdf/guide_onvs_-_prevention_atteintes_aux_personnes_et_aux_biens_2017-04-27.pdf). Accessed May 26, 2018.

<sup>11</sup> Lyneham J. Violence in New South Wales emergency departments. *Aust J Adv Nurs* 2000;18:8–17.

- 1  
2  
3  
4  
5 12 Needham I, Abderhalden C, Halfens RJG, et al. Non-somatic effects of patient aggression on nurses:  
6 a systematic review. *J Adv Nurs* 2005;49:283–96.  
7  
8  
9 13 Wallace JE, Lemaire JB, Ghali WA. Physician wellness: a missing quality indicator. *Lancet*  
10 2009;374:1714-21.  
11  
12  
13 14 Gates DM, Gillespie GL, Succop P. Violence against nurses and its impact on stress and productivity.  
14 *Nurs Econ* 2011;29:59–66.  
15  
16  
17 15 Garnham P: Understanding and dealing with anger, aggression and violence. *Nurs Stand*  
18 2001;16:37-42.  
19  
20  
21 16 Hodge AN, Marshall AP: Violence and aggression in the emergency department: a critical care  
22 perspective. *Aust Crit Care* 2007;20:61-7.  
23  
24  
25 17 Gates D, Gillespie G, Smith C, et al. Using action research to plan a violence prevention program for  
26 emergency departments. *J Emerg Nurs* 2011;37:32-9.  
27  
28  
29 18 Ramacciati N, Ceccagnoli A, Addey B, et al. Interventions to reduce the risk of violence toward  
30 emergency department staff: current approaches. *Open Access Emerg Med* 2016;8:17-27.  
31  
32  
33 19 Soremekun OA, Capp R, Biddinger PD, et al. Impact of physician screening in the emergency  
34 department on patient flow. *J Emerg Med* 2012;43:509-15.  
35  
36  
37 20 Morphet J, Griffiths D, Plummer V, et al. At the crossroads of violence and aggression in the  
38 emergency department: perspectives of Australian emergency nurses. *Aust Health Rev* 2014;38:194-  
39 201.  
40  
41  
42 21 Weiland TJ, Ivory S, Hutton J. Managing Acute Behavioural Disturbances in the Emergency  
43 Department Using the Environment, Policies and Practices: A Systematic Review. *West J Emerg Med*  
44 2017;18:647-661.  
45  
46  
47 22 d'Aubarede C, Sarnin P, Cornut PL, et al. Impacts of users' antisocial behaviors in an ophthalmologic  
48 emergencydepartment--a qualitative study. *J Occup Health* 2016;58:96-106.  
49  
50  
51  
52  
53  
54  
55  
56  
57  
58  
59  
60

- 1  
2  
3  
4  
5 23 Touzet S, Cornut PL, Fassier JB, et al. Impact of a program to prevent incivility towards and assault  
6  
7 of healthcare staff in an ophthalmological emergency unit: study protocol for the PREVURGO On/Off  
8  
9 trial. *BMC Health Serv Res* 2014;14:221.  
10  
11 24 Wagner AK, Soumerai SB, Zhang F, et al. Segmented regression analysis of interrupted time series  
12  
13 studies in medication use research. *J Clin Pharm Ther* 2002;27:299-309.  
14  
15 25 Bernal JL, Cummins S, Gasparrini A. Interrupted time series regression for the evaluation of public  
16  
17 health interventions: a tutorial. *Int J Epidemiol* 2017;46:348-355.  
18  
19 26 Nikathil S, Olaussen A, Gocentas RA, et al. Review article: Workplace violence in the emergency  
20  
21 department: A systematic review and meta analysis. *Emerg Med Australas* 2017;29:265-275.  
22  
23 27 Maguire BJ, O'Meara P, O'Neill BJ, et al. Violence against emergency medical services personnel: A  
24  
25 systematic review of the literature. *Am J Ind Med* 2018;61:167-180.  
26  
27 28 Tadros A, Kiefer C. Violence in the Emergency Department: A Global Problem. *Psychiatr Clin North*  
28  
29 *Am* 2017;40:575-584.  
30  
31 29 Kowalenko T, Gates D, Gillespie GL, et al. Prospective study of violence against ED workers. *Am J*  
32  
33 *Emerg Med* 2013;31:197-205.  
34  
35 30 Gillespie GL, Gates DM, Kowalenko T, et al. Implementation of a comprehensive intervention to  
36  
37 reduce physical assaults and threats in the emergency department. *J Emerg Nurs* 2014;40:586-91.  
38  
39 31 Fernandes CM, Raboud JM, Christenson JM, et al. Violence in the Emergency Department Study  
40  
41 (VITES) Group. The effect of an education program on violence in the emergency department. *Ann*  
42  
43 *Emerg Med* 2002;39:47-55.  
44  
45 32 Ramacciati N, Ceccagnoli A, Addey B, et al. Violence towards emergency nurses: A narrative review  
46  
47 of theories and frameworks. *Int Emerg Nurs* 2018;39:2-12.  
48  
49 33 Copeland D, Henry M. Workplace Violence and Perceptions of Safety Among Emergency  
50  
51 Department Staff Members: Experiences, Expectations, Tolerance, Reporting, and  
52  
53 Recommendations. *J Trauma Nurs* 2017;24:65-77.  
54  
55  
56  
57  
58  
59  
60

1  
2  
3  
4  
5 <sup>34</sup> Pich J, Hazelton M, Sundin D, et al. Patient-related violence against emergency department nurses.

6  
7 *Nurs Health Sci* 2010;12:268-74.

8  
9 <sup>35</sup> Ramsey CR, Matowe L, Grilli R, et al. Interrupted time series designs in health technology

10  
11 assessment: lessons from two systematic reviews of behaviour change strategies. *Int J Technol Assess*

12  
13  
14 *Health Care* 2003;19:613-623.

15  
16 <sup>36</sup> Lagarde M. How to do (or not to do) ... Assessing the impact of a policy change with routine

17  
18 longitudinal data. *Health Policy Plan* 2012;27:76-83.

19  
20 <sup>37</sup> Penfold RB, Zhang. Use of interrupted time series analysis in evaluating health care quality

21  
22 improvements. *Academic paediatrics* 2003;13:S38-S44.

23  
24 <sup>38</sup> Guével MR, Pommier J. Mixed methods research in public health: issues and illustration. *Sante*

25  
26  
27 *Publique* 2012;24:23-38.

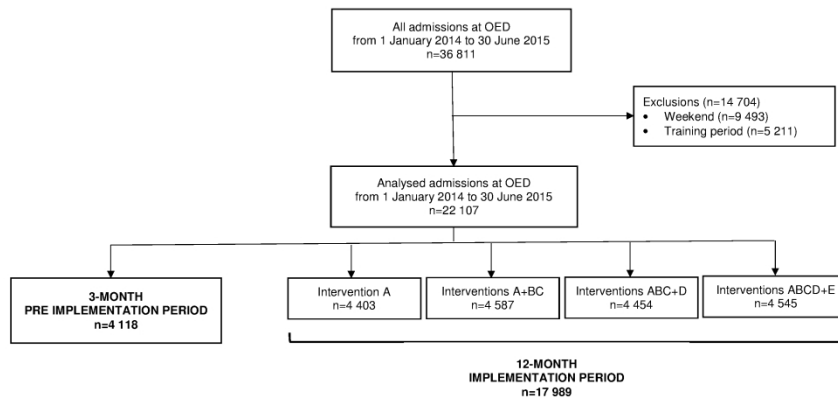

Study flow chart of admissions at Ophthalmology Emergency Department.  
 Legend: Components: A: computerised triage algorithm, BC: signage and messages broadcast on TV in the waiting rooms, D: mediator, E: video surveillance.

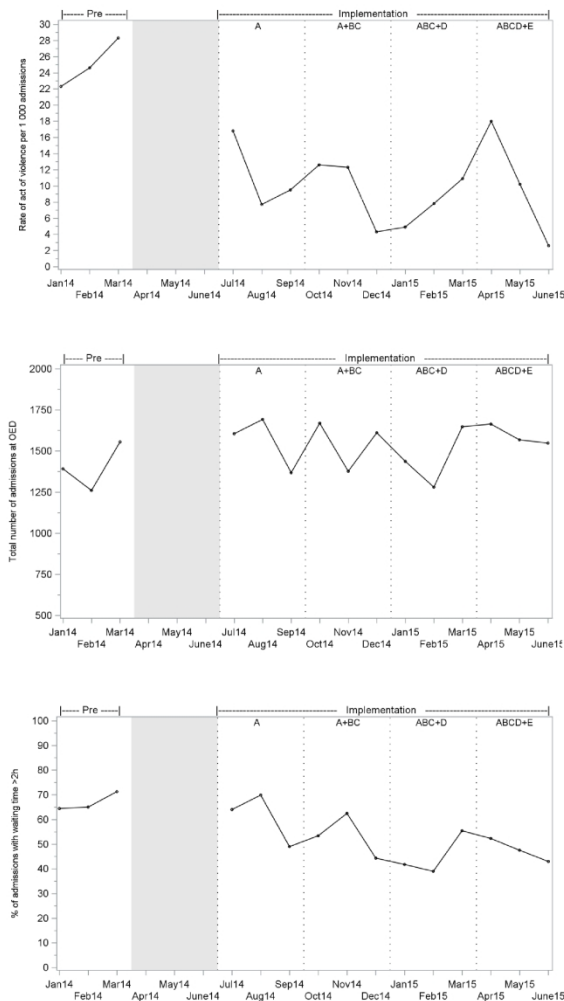

Observed time series of the A) rates of admission at OED with acts of violence, B) total number of admissions at OED and C) rates of admissions with waiting time greater than 2 hours by month before and during implementation of the prevention program.

Abbreviation: OED: Ophthalmology Emergency Department

Legend: the grey band represents the 3-month training period. The dotted lines inside the scatter plots represents the implementation of component A (computerised triage algorithm), component BC (signage and messages broadcast on TV in the waiting rooms), component D (mediator) and component E (video surveillance).

209x297mm (300 x 300 DPI)

# Reporting checklist for quality improvement study.

Based on the SQUIRE guidelines.

## Instructions to authors

Complete this checklist by entering the page numbers from your manuscript where readers will find each of the items listed below.

Your article may not currently address all the items on the checklist. Please modify your text to include the missing information. If you are certain that an item does not apply, please write "n/a" and provide a short explanation.

Upload your completed checklist as an extra file when you submit to a journal.

In your methods section, say that you used the SQUIRE reporting guidelines, and cite them as:

Ogrinc G, Davies L, Goodman D, Batalden P, Davidoff F, Stevens D. SQUIRE 2.0 (Standards for QUality Improvement Reporting Excellence): revised publication guidelines from a detailed consensus process

|                     | Reporting Item                                                                                                                                                                                                                      | Page Number |
|---------------------|-------------------------------------------------------------------------------------------------------------------------------------------------------------------------------------------------------------------------------------|-------------|
|                     | #1 Indicate that the manuscript concerns an initiative to improve healthcare (broadly defined to include the quality, safety, effectiveness, patientcenteredness, timeliness, cost, efficiency, and equity of healthcare)           | 1           |
|                     | #02a Provide adequate information to aid in searching and indexing                                                                                                                                                                  | 1           |
|                     | #02b Summarize all key information from various sections of the text using the abstract format of the intended publication or a structured summary such as: background, local problem, methods, interventions, results, conclusions | 1           |
| Problem description | #3 Nature and significance of the local problem                                                                                                                                                                                     | 6           |
| Available knowledge | #4 Summary of what is currently known about the problem, including relevant previous studies                                                                                                                                        | 5           |
| Rationale           | #5 Informal or formal frameworks, models, concepts, and / or theories used to explain the problem, any reasons or                                                                                                                   | 5 - 6       |



|    |                 |      |                                                                     |          |
|----|-----------------|------|---------------------------------------------------------------------|----------|
| 1  |                 |      | assumptions that were used to develop the intervention(s), and      |          |
| 2  |                 |      | reasons why the intervention(s) was expected to work                |          |
| 3  |                 |      |                                                                     |          |
| 4  | Specific aims   | #6   | Purpose of the project and of this report                           | 6        |
| 5  |                 |      |                                                                     |          |
| 6  | Context         | #7   | Contextual elements considered important at the outset of           | 7        |
| 7  |                 |      | introducing the intervention(s)                                     |          |
| 8  |                 |      |                                                                     |          |
| 9  |                 |      |                                                                     |          |
| 10 | Intervention(s) | #08a | Description of the intervention(s) in sufficient detail that others | 8        |
| 11 |                 |      | could reproduce it                                                  |          |
| 12 |                 |      |                                                                     |          |
| 13 |                 |      |                                                                     |          |
| 14 |                 | #08b | Specifics of the team involved in the work                          | 8        |
| 15 |                 |      |                                                                     |          |
| 16 | Study of the    | #09a | Approach chosen for assessing the impact of the intervention(s)     | 6        |
| 17 | Intervention(s) |      |                                                                     |          |
| 18 |                 |      |                                                                     |          |
| 19 |                 |      |                                                                     |          |
| 20 |                 | #09b | Approach used to establish whether the observed outcomes            | 6, 12,13 |
| 21 |                 |      | were due to the intervention(s)                                     |          |
| 22 |                 |      |                                                                     |          |
| 23 |                 |      |                                                                     |          |
| 24 | Measures        | #10a | Measures chosen for studying processes and outcomes of the          | 9        |
| 25 |                 |      | intervention(s), including rationale for choosing them, their       |          |
| 26 |                 |      | operational definitions, and their validity and reliability         |          |
| 27 |                 |      |                                                                     |          |
| 28 |                 |      |                                                                     |          |
| 29 |                 | #10b | Description of the approach to the ongoing assessment of            | 9        |
| 30 |                 |      | contextual elements that contributed to the success, failure,       |          |
| 31 |                 |      | efficiency, and cost                                                |          |
| 32 |                 |      |                                                                     |          |
| 33 |                 |      |                                                                     |          |
| 34 |                 | #10c | Methods employed for assessing completeness and accuracy            | 9        |
| 35 |                 |      | of data                                                             |          |
| 36 |                 |      |                                                                     |          |
| 37 |                 |      |                                                                     |          |
| 38 | Analysis        | #11a | Qualitative and quantitative methods used to draw inferences        | 12,13    |
| 39 |                 |      | from the data                                                       |          |
| 40 |                 |      |                                                                     |          |
| 41 |                 |      |                                                                     |          |
| 42 |                 | #11b | Methods for understanding variation within the data, including      | 12,13    |
| 43 |                 |      | the effects of time as a variable                                   |          |
| 44 |                 |      |                                                                     |          |
| 45 |                 |      |                                                                     |          |
| 46 | Ethical         | #12  | Ethical aspects of implementing and studying the intervention(s)    | 28,29    |
| 47 | considerations  |      | and how they were addressed, including, but not limited to,         |          |
| 48 |                 |      | formal ethics review and potential conflict(s) of interest          |          |
| 49 |                 |      |                                                                     |          |
| 50 |                 |      |                                                                     |          |
| 51 |                 | #13a | Initial steps of the intervention(s) and their evolution over time  | See note |
| 52 |                 |      | (e.g., time-line diagram, flow chart, or table), including          | 1        |
| 53 |                 |      | modifications made to the intervention during the project           |          |
| 54 |                 |      |                                                                     |          |
| 55 |                 |      |                                                                     |          |
| 56 |                 | #13b | Details of the process measures and outcome                         | 9        |
| 57 |                 |      |                                                                     |          |
| 58 |                 |      |                                                                     |          |
| 59 |                 |      |                                                                     |          |
| 60 |                 |      |                                                                     |          |

|    |                |      |                                                                   |          |
|----|----------------|------|-------------------------------------------------------------------|----------|
| 1  |                | #13c | Contextual elements that interacted with the intervention(s)      | 15       |
| 2  |                |      |                                                                   |          |
| 3  |                | #13d | Observed associations between outcomes, interventions, and        | 20       |
| 4  |                |      | relevant contextual elements                                      |          |
| 5  |                |      |                                                                   |          |
| 6  |                |      |                                                                   |          |
| 7  |                | #13e | Unintended consequences such as unexpected benefits,              | See note |
| 8  |                |      | problems, failures, or costs associated with the intervention(s). | 2        |
| 9  |                |      |                                                                   |          |
| 10 |                |      |                                                                   |          |
| 11 |                | #13f | Details about missing data                                        | See note |
| 12 |                |      |                                                                   | 3        |
| 13 |                |      |                                                                   |          |
| 14 |                |      |                                                                   |          |
| 15 | Summary        | #14a | Key findings, including relevance to the rationale and specific   | 25       |
| 16 |                |      | aims                                                              |          |
| 17 |                |      |                                                                   |          |
| 18 |                | #14b | Particular strengths of the project                               | 25       |
| 19 |                |      |                                                                   |          |
| 20 |                |      |                                                                   |          |
| 21 | Interpretation | #15a | Nature of the association between the intervention(s) and the     | 25       |
| 22 |                |      | outcomes                                                          |          |
| 23 |                |      |                                                                   |          |
| 24 |                | #15b | Comparison of results with findings from other publications       | 25       |
| 25 |                |      |                                                                   |          |
| 26 |                | #15c | Impact of the project on people and systems                       | 25       |
| 27 |                |      |                                                                   |          |
| 28 |                | #15d | Reasons for any differences between observed and anticipated      | 20       |
| 29 |                |      | outcomes, including the influence of context                      |          |
| 30 |                |      |                                                                   |          |
| 31 |                |      |                                                                   |          |
| 32 |                |      |                                                                   |          |
| 33 |                | #15e | Costs and strategic trade-offs, including opportunity costs       | See note |
| 34 |                |      |                                                                   | 4        |
| 35 |                |      |                                                                   |          |
| 36 |                |      |                                                                   |          |
| 37 | Limitations    | #16a | Limits to the generalizability of the work                        | 26       |
| 38 |                |      |                                                                   |          |
| 39 |                | #16b | Factors that might have limited internal validity such as         | 26       |
| 40 |                |      | confounding, bias, or imprecision in the design, methods,         |          |
| 41 |                |      | measurement, or analysis                                          |          |
| 42 |                |      |                                                                   |          |
| 43 |                |      |                                                                   |          |
| 44 |                | #16c | Efforts made to minimize and adjust for limitations               | 26       |
| 45 |                |      |                                                                   |          |
| 46 |                |      |                                                                   |          |
| 47 | Conclusion     | #17a | Usefulness of the work                                            | 27       |
| 48 |                |      |                                                                   |          |
| 49 |                | #17b | Sustainability                                                    | 27       |
| 50 |                |      |                                                                   |          |
| 51 |                | #17c | Potential for spread to other contexts                            | 26       |
| 52 |                |      |                                                                   |          |
| 53 |                |      |                                                                   |          |
| 54 |                | #17d | Implications for practice and for further study in the field      | 27       |
| 55 |                |      |                                                                   |          |
| 56 |                | #17e | Suggested next steps                                              | 27       |
| 57 |                |      |                                                                   |          |
| 58 |                |      |                                                                   |          |
| 59 |                |      |                                                                   |          |
| 60 |                |      |                                                                   |          |

1 Funding #18 Sources of funding that supported this work. Role, if any, of the 28  
2 funding organization in the design, implementation,  
3 interpretation, and reporting  
4  
5

## 6 Author notes

- 9 1. 8, figure 1
- 11 2. n/a (not measured)
- 13 3. n/a (self-reported)
- 15 4. n/a (not measured)

17  
18 The SQUIRE 2.0 checklist is distributed under the terms of the Creative Commons Attribution License  
19 CC BY-NC 4.0. This checklist was completed on 12. April 2019 using <https://www.goodreports.org/>, a  
20 tool made by the [EQUATOR Network](#) in collaboration with [Penelope.ai](#)  
21  
22  
23  
24  
25  
26  
27  
28  
29  
30  
31  
32  
33  
34  
35  
36  
37  
38  
39  
40  
41  
42  
43  
44  
45  
46  
47  
48  
49  
50  
51  
52  
53  
54  
55  
56  
57  
58  
59  
60

# BMJ Open

## Impact of a comprehensive prevention programme aimed at reducing incivility and verbal violence against healthcare workers in a French ophthalmic emergency department: an interrupted time-series study.

|                                 |                                                                                                                                                                                                                                                                                                                                                                                                                                                                                                                                                                                                                                                                                                                                                                                                                                                                                                                                                                                                               |
|---------------------------------|---------------------------------------------------------------------------------------------------------------------------------------------------------------------------------------------------------------------------------------------------------------------------------------------------------------------------------------------------------------------------------------------------------------------------------------------------------------------------------------------------------------------------------------------------------------------------------------------------------------------------------------------------------------------------------------------------------------------------------------------------------------------------------------------------------------------------------------------------------------------------------------------------------------------------------------------------------------------------------------------------------------|
| Journal:                        | <i>BMJ Open</i>                                                                                                                                                                                                                                                                                                                                                                                                                                                                                                                                                                                                                                                                                                                                                                                                                                                                                                                                                                                               |
| Manuscript ID                   | bmjopen-2019-031054.R1                                                                                                                                                                                                                                                                                                                                                                                                                                                                                                                                                                                                                                                                                                                                                                                                                                                                                                                                                                                        |
| Article Type:                   | Research                                                                                                                                                                                                                                                                                                                                                                                                                                                                                                                                                                                                                                                                                                                                                                                                                                                                                                                                                                                                      |
| Date Submitted by the Author:   | 10-Jul-2019                                                                                                                                                                                                                                                                                                                                                                                                                                                                                                                                                                                                                                                                                                                                                                                                                                                                                                                                                                                                   |
| Complete List of Authors:       | Touzet, Sandrine; Hospices Civils de Lyon, Pôle de Santé Publique; Université de Lyon, Laboratoire Health Services and Performance Research (HESPER) EA 7425<br>Ocelli, Pauline; Hospices Civils de Lyon, Pôle de Santé Publique; Université de Lyon, Laboratoire Health Services and Performance Research (HESPER) EA 7425<br>Denis, Angelique; Hospices Civils de Lyon, Pôle de Santé Publique<br>Cornut, Pierre-Loïc; Hospices Civils de Lyon, Hôpital Edouard Herriot, Service d'ophtalmologie<br>Fassier, Jean-Baptiste; Hospices Civils de Lyon, Pôle de Santé Publique; Université de Lyon, UMRESTTE<br>Le Pogam, Marie-Annick; University Hospital of Lausanne, Institute of Social and Preventive Medicine (IUMSP)<br>Duclos, Antoine; Hospices Civils de Lyon, Pôle de Santé Publique; Université de Lyon, Laboratoire Health Services and Performance Research (HESPER) EA 7425<br>Burillon, Carole; Hospices Civils de Lyon, Hôpital Edouard Herriot, Service d'ophtalmologie; Université de Lyon |
| <b>Primary Subject Heading</b>: | Emergency medicine                                                                                                                                                                                                                                                                                                                                                                                                                                                                                                                                                                                                                                                                                                                                                                                                                                                                                                                                                                                            |
| Secondary Subject Heading:      | Health services research                                                                                                                                                                                                                                                                                                                                                                                                                                                                                                                                                                                                                                                                                                                                                                                                                                                                                                                                                                                      |
| Keywords:                       | Health services research, Time series study, Health care workers, Violence, ACCIDENT & EMERGENCY MEDICINE                                                                                                                                                                                                                                                                                                                                                                                                                                                                                                                                                                                                                                                                                                                                                                                                                                                                                                     |
|                                 |                                                                                                                                                                                                                                                                                                                                                                                                                                                                                                                                                                                                                                                                                                                                                                                                                                                                                                                                                                                                               |

SCHOLARONE™  
Manuscripts

1  
2  
3 TITLE PAGE4  
5 **Title of the article:**6  
7  
8 Impact of a comprehensive prevention programme aimed at reducing incivility and verbal violence  
9  
10 against healthcare workers in a French ophthalmic emergency department: an interrupted time-  
11  
12 series study.  
1314  
15 **Corresponding author**16  
17 Sandrine Touzet18  
19 Hospices Civils de Lyon20  
21 Pôle de Santé Publique22  
23 162 avenue Lacassagne24  
25 69003 Lyon26  
27 France28  
29 sandrine.touzet@chu-lyon.fr30  
31 +33 472 11 51 62  
32  
3334  
35  
36 **Authors**37  
38 Sandrine Touzet\*(1, 2), sandrine.touzet@chu-lyon.fr39  
40 Pauline Occelli (1, 2), pauline.occelli@chu-lyon.fr41  
42 Angelique Denis (1), angelique.denis@chu-lyon.fr43  
44 Pierre-Loïc Cornut (3), dr.cornut@gmail.com45  
46 Jean-Baptiste Fassier (4, 5), jean-baptiste.fassier@chu-lyon.fr47  
48 Marie-Annick Le Pogam (6), marie-annick.le-pogam@chuv.ch49  
50 Antoine Duclos (1, 2), antoine.duclos@chu-lyon.fr51  
52 Carole Burillon (3, 7), carole.burillon@chu-lyon.fr53  
54 The PREVURGO Study Group.55  
56 \*Corresponding author  
57  
58  
59  
60

1  
2  
3 **The PREVURGO study group:**  
4

5 Nassira Amamra  
6

7 Emmanuelle Aubert  
8

9 Sylvain Beccat  
10

11 Daniel Betito  
12

13 Laetitia Bouveret  
14

15 Philippe Charrier  
16

17 Dominique Delaunay  
18

19 Mélanie Dufourneau  
20

21 André Lecoanet  
22

23 Philippe Sarnin  
24

25 Jéromine Sicalac  
26

27 Sylvie Sullerot  
28  
29  
30  
31

32  
33 **Institutional addresses**  
34

35  
36 1. Centre Hospitalier Universitaire de Lyon, Pôle de Santé Publique, Unité de recherche sur les  
37 services de santé, Lyon, FR.  
38

39  
40 2. Université Claude Bernard Lyon 1, Laboratoire HESPER Health Services and Performance Research  
41 EA 7425, Lyon, FR.  
42

43  
44 3. Hospices civils de Lyon, Hôpital Edouard Herriot, Service d'ophtalmologie, Lyon, FR.  
45

46  
47 4. Centre Hospitalier Universitaire de Lyon, Service de médecine et santé au travail, Lyon, FR.  
48

49  
50 5. Université Claude Bernard Lyon 1 - Domaine de Rockefeller, UMRESTTE UMR T\_9405, Unité mixte  
51 de recherche Epidémiologique et de Surveillance Transport Travail Environnement, Lyon, FR.  
52

53  
54 6. Institute of Social and Preventive Medicine (IUMSP), Lausanne University Hospital (CHUV),  
55 Lausanne, CH.  
56

57  
58 7. Université Claude Bernard Lyon 1, Villeurbanne, FR.  
59  
60

1  
2  
3  
4  
5  
6  
7  
8  
9  
10  
11  
12  
13  
14  
15  
16  
17  
18  
19  
20  
21  
22  
23  
24  
25  
26  
27  
28  
29  
30  
31  
32  
33  
34  
35  
36  
37  
38  
39  
40  
41  
42  
43  
44  
45  
46  
47  
48  
49  
50  
51  
52  
53  
54  
55  
56  
57  
58  
59  
60

**KEY WORDS**

Health services research; Time series study; Health care workers; Violence.

**WORD COUNT**

4598

For peer review only

## ABSTRACT

**Objective and setting:** Primary prevention, comprising patient-oriented and environmental interventions, is considered one of the best ways to reduce violence in the emergency department.

We assessed the impact of a comprehensive prevention programme aimed at preventing incivility and verbal violence against healthcare professionals working in the ophthalmology emergency department (OED) of a university hospital.

**Intervention:** The programme was designed to address long waiting times and lack of information, both of which can plague patients. It combined a computerized triage algorithm linked to a waiting room patient call system, signage to assist patients navigate in the OED, educational messages broadcast in the waiting room, presence of a mediator, and a video surveillance.

**Participants:** All patients admitted to the OED and those accompanying them.

**Design:** a single-centre prospective interrupted time-series study over 18 months.

**Primary outcome:** Violent acts self-reported by healthcare workers committed by patients or those accompanying them against healthcare workers.

**Secondary outcomes:** waiting and length of stay.

**Results:** There were a total of 22,107 admissions, including 272 (1.4%) with at least one act of incivility and verbal violence reported by the healthcare workers. Almost all acts of violence were incivility or verbal harassment. The rate of violence significantly decreased from the pre-intervention to the intervention period (24.8; 95%CI: 20.0 to 29.5 to 9.5; 95%CI 8.0 to 10.9 acts per 1000 admissions;  $p < 0.001$ ). An immediate 53% decrease in the violence rate (IRR=0.47, 95%CI: 0.27 to 0.82,  $p = 0.0121$ ) was observed in the first month of the intervention period, after implementation of the triage algorithm.

**Conclusion:** A comprehensive prevention programme targeting patients and environment can reduce self-reported incivility and verbal violence against healthcare workers in an OED.

**Trial registration:** registered at [clinicaltrials.gov](http://clinicaltrials.gov) (identifier: NCT02015884).



## ARTICLE SUMMARY

### Strengths and limitations of this study

- Our comprehensive primary prevention programme integrated components that were environment and patient-oriented (organisational, educational, relational, security).
- A segmented regression was conducted analysis to detect if the programme had a greater effect than an underlying secular trend.
- The primary outcome is self-reported act of violence, which is subjective.
- To limit variation in self-reporting practices, the researchers met monthly with the OED team to discuss the importance of reporting each acts of violence from least (incivility, rudeness) to most severe (assault).
- The generalization of the results is limited by the single-centre study design and by the differences between the OEDs and general emergencies.

## MAIN TEXT

### Introduction

According to the International Labor Office, workplace violence is a frequent phenomenon.<sup>1</sup> Hospital healthcare workers are particularly vulnerable by their exposure to patients who can be agitated and distressed.<sup>2,3,4</sup> Around the world, the emergency departments (ED) have been identified as an area of the healthcare sector with a high number of reported violent acts.<sup>5,6,7,8,9,10,11</sup> However, the phenomenon is underreported, especially non-physical violence (i.e. incivility, harassment, verbal violence). Comparison of self-report and actual documentation of hospital incidents in the US showed that 88% of the events were not document.<sup>12</sup> Such reports are mainly informally reported to the colleagues.<sup>13</sup>

Four levels of aggressiveness are distinguished by order of severity by the French National Observatory of Violence in healthcare to describe violent behaviour: incivility (a lack of respect for others that manifests itself as relatively harmless acts), verbal abuse, physical threat (insults, threatening behaviour), and physically violent acts.<sup>14</sup> This violence can have repercussions on the physical and emotional health of the victims, and thus on their well-being and the quality of their work. Healthcare workers have been shown to suffer emotional symptoms similar to post-traumatic stress disorder, job dissatisfaction, and early feelings of burnout, while hospitals have to bear the financial burden of decreased productivity.<sup>15,16,17,18,19</sup>

In the ED, the frequency of visits observed in recent years has been accompanied by a drastic increase in the waiting times<sup>20</sup> which can lead to a high level of patient dissatisfaction and of aggression towards healthcare workers. Other factors, such as anxiety, boredom, lack of information, lack of understanding of triage categories, may also favour violent behaviour.<sup>21,22</sup>

According to the Haddon matrix adapted by Gates *et al.*, interventions to reduce violence in the ED can be categorized according to the time of intervention: before (primary prevention), during (secondary prevention), or after (tertiary prevention) an act of violence; and according to the target

1  
2  
3 of the intervention (healthcare workers, patients or accompanying visitors, and environment).<sup>23,24</sup>

4  
5 There are several solutions for the prevention of ED violence. Many have concerned primary  
6  
7 prevention with interventions aiming at reducing waiting times, managing priorities (implementation  
8  
9 of a triage algorithm to manage patients according to the seriousness of the cases), improving  
10  
11 signage and patients' understanding of the care pathway.<sup>25,26</sup> Security of premises (security guards,  
12  
13 video surveillance, warning systems, etc.) can sometimes be implemented.<sup>7</sup> The few studies that  
14  
15 have attempted to evaluate the effectiveness of prevention interventions have a low level of  
16  
17 evidence.<sup>24,27</sup>

18  
19  
20  
21 In the ophthalmology emergency department (OED) of a French university hospital, the healthcare  
22  
23 workers reported the occurrence of acts of incivility and verbal violence, with both medical and  
24  
25 nursing staff demanding that this issue be addressed.<sup>28</sup> The solutions identified to deal with violence  
26  
27 included reducing waiting times, improving the premises (i.e. the comfort of waiting rooms,  
28  
29 confidentiality at the registration desk), changing signage, improving patient information, and  
30  
31 mediation. These components were integrated in a comprehensive primary prevention programme  
32  
33 aimed at averting violence through different components that were environment and patient-  
34  
35 oriented. The aim of this study was to evaluate the impact of this prevention programme on acts of  
36  
37 incivility and verbal violence against healthcare workers in the OED.  
38  
39  
40  
41  
42  
43  
44

## 45 **Methods**

### 46 ***Study design***

47  
48  
49 The study was designed as a single-centre, prospective interrupted time series study. There were  
50  
51 three periods: a 3-month pre-interventional period (from 1 January 2014 until 30 March 2014), a 3-  
52  
53 month training period (from 31 March 2014 until 9 July 2014) and a 12-month implementation  
54  
55 period of the prevention programme (from 10 July 2014 until 30 June 2015); the protocol has been  
56  
57 previously published.<sup>29</sup>  
58  
59  
60

1  
2  
3 *Deviations from the published protocol*<sup>29</sup>: the planned study design was a “on – off” study over 24  
4 months (including a 2-month pre-interventional period and a 22-month intervention period, without  
5 a training period). The first 6 months of the study were not taken into account owing to strong  
6 underreporting of violent acts by the healthcare worker, as ascertained during study coordination  
7 meetings. To meet the study schedule, we reduced the duration of the study to 18 months and we  
8 modified the study design. We chose to abandon the “on – off” design because of time constraints  
9 and the low acceptability of the “off” period when the intervention was to be removed.  
10  
11  
12  
13  
14  
15  
16  
17

### 18 ***Patient and Public Involvement***

19 Patients or the public were not involved in this work.  
20  
21

### 22 ***Setting***

23 This study took place at an adult OED of a university hospital located in an urban environment, in the  
24 Rhône-Alpes region of France. The OED is open 24 hours a day, 7 days a week, and handles all types  
25 of medical and surgical ophthalmological emergencies. In 2014, the department treated 20 309  
26 patients with 68 admissions a day on average.  
27  
28  
29  
30  
31  
32  
33  
34  
35

### 36 ***Participants***

#### 37 ***Patients and those accompanying them***

38 All patients (adults and children) registering at the OED from 1 January 2014 to 30 June 2015 were  
39 included. Those accompanying the patient (family, friends, etc.) were also included. Patients  
40 registering during weekends and public holidays were excluded owing to the organisational  
41 characteristics of these periods (i.e. different and fewer staff as compared to weekdays), as were  
42 those registering during the 3-month training period from 31 March 2014 to 9 July 2014.  
43  
44  
45  
46  
47  
48  
49  
50  
51

#### 52 ***Healthcare workers***

53 The OED team (seven nurses, six ward aides, two orthoptic students, seven residents in  
54 ophthalmology, four senior ophthalmologists) operating on a rotating schedule to provide care 24/7  
55 were included in the study. The OED team present during a week day is composed of four nurses,  
56  
57  
58  
59  
60

1  
2  
3 four ward aides, two orthoptic students, one or two residents in ophthalmology, and one on-call  
4  
5 senior ophthalmologist; this did not change over the study period. Four admitting clerks were also  
6  
7 included.  
8  
9

### 10 ***Prevention programme***

#### 11 *Programme elaboration*

12  
13 The OED team partnered with researchers to develop the comprehensive prevention programme.

14  
15 The programme had five complementary components, identified through a literature review, that  
16  
17 were added progressively:  
18  
19

20  
21 - An organisational component (A), beginning 30 March 2014, with the use by reception nurses of a  
22  
23 computerized triage algorithm. This algorithm made it possible to prioritize patients as soon as they  
24  
25 arrived in the unit and to carry out initial examinations (such as dilatation of the pupils by the  
26  
27 orthoptist) according to the patient's reason for presentation to the OED. It was linked to a waiting  
28  
29 room patient call system. A 3-month phase of training to use of the algorithm was conducted for  
30  
31 reception nurses (named "training period"). This training period was not planned in the published  
32  
33 protocol.<sup>29</sup>  
34  
35

36  
37 - An environmental component (B) and educational component (C) beginning 6 October 2014 were  
38  
39 combined. The environmental component was signage to help patients navigate within the OED. The  
40  
41 educational component was messages about the OED team and its activity, the care pathway, the  
42  
43 patients' order of passage according to severity, and information on the waiting time range that were  
44  
45 broadcast on TV in the waiting rooms to patients. As both components addressed difficulties for the  
46  
47 patients to understand the functioning of the OED, we considered it appropriate to combine them.  
48  
49 This is a deviation from the initial protocol.<sup>29</sup>  
50  
51

52  
53 - A relational component (D) beginning 5 January 2015 with the presence of a mediator in the OED,  
54  
55 for preventive mediation actions. The mediator held a master's degree in mediation, and was  
56  
57 recruited as part of the project. The mediator was to intervene when patients showed signs of  
58  
59  
60

1  
2  
3 impatience or nervousness and in case of conflict involving a patient or visitor. The mediator  
4  
5 circulated through corridors and waiting rooms, and was available to patients and visitors.  
6

7 - A security component (E) beginning 6 April 2015, with the implementation of video surveillance  
8  
9 cameras throughout the OED (admissions desk, corridors) connected to the hospital security control  
10  
11 room.  
12

### 13 *Programme implementation*

14  
15 The prevention programme was implemented in four steps of three months period, after a 3-month  
16  
17 training period for the computerized triage algorithm (Figure 1). The study project manager  
18  
19 conducted monthly visits to the OED during the intervention period to ensure programme  
20  
21 implementation.  
22  
23  
24

### 25 **Outcomes**

26  
27 *The primary outcome* was violence committed by patients or those accompanying them against  
28  
29 healthcare workers or against other patients and those accompanying them among all admissions to  
30  
31 the OED.  
32  
33

34  
35 Violence was reported in medical records by healthcare workers. They could report incidents directly  
36  
37 committed against them or against patients and those accompanying them. Violence was described  
38  
39 using a classification that distinguishes four levels, from least (incivility) to most severe (assault),  
40  
41 based on the French National Observatory of Violence in healthcare (Table 1).<sup>29</sup> Clinical cases were  
42  
43 used monthly to train professionals to identify the different types of acts of violence to be reported  
44  
45 and their level of severity (see table 1 for examples). They were developed from situations  
46  
47 experienced by OED professionals. These situations were identified during interviews with OED  
48  
49 professionals conducted by the researchers prior to the initiation of the study.<sup>28</sup> The aim was to  
50  
51 reduce the variability in the classification of events.  
52  
53

54  
55 The project manager also met monthly with the OED team to discuss the importance of reporting  
56  
57 events to limit under-reporting of acts violence.  
58  
59  
60

1  
2  
3 *Secondary outcomes* were waiting time (defined as the interval of time between the administrative  
4 registration of the patient and the assessment by a nurse or an ophthalmologist) and length of stay  
5  
6 (defined as the interval of time between registration and discharge). This information was routinely  
7  
8 collected at the OED for all inpatients.  
9  
10  
11  
12  
13  
14  
15  
16  
17  
18  
19  
20  
21  
22  
23  
24  
25  
26  
27  
28  
29  
30  
31  
32  
33  
34  
35  
36  
37  
38  
39  
40  
41  
42  
43  
44  
45  
46  
47  
48  
49  
50  
51  
52  
53  
54  
55  
56  
57  
58  
59  
60

For peer review only

**Table 1. Four levels of violence, from least to most severe according to the National Observatory of Violence in Hospitals and examples of clinical cases used to train healthcare workers.**

|                                |                                                                                                                                                                                                                                                                                                                                                                                                                                                                                  |
|--------------------------------|----------------------------------------------------------------------------------------------------------------------------------------------------------------------------------------------------------------------------------------------------------------------------------------------------------------------------------------------------------------------------------------------------------------------------------------------------------------------------------|
| Level 1<br>(incivility)        | <p>Insistent questions, incivility, rudeness, occupation of the corridor, spitting, making noise (telephone, etc.)</p> <p>Examples:</p> <ul style="list-style-type: none"> <li>- A patient (or an accompanying person) opens the door of the nursing office without knocking, or waiting for an answer, and calls you for some reason.</li> <li>- A patient (or an accompanying person) considering that everyone comes before him comes to show his dissatisfaction.</li> </ul> |
| Level 2<br>(verbal harassment) | <p>Insult or verbal abuse without threat</p> <p>Examples:</p> <ul style="list-style-type: none"> <li>- A patient (or an accompanying person), dissatisfied with your answer, calls you an asshole.</li> <li>- A patient (or an accompanying person), tired of waiting, calls you a loser or incapable.</li> </ul>                                                                                                                                                                |
| Level 3<br>(threats)           | <p>Verbal or physical threat.</p> <p>Examples:</p> <ul style="list-style-type: none"> <li>- A patient (or an accompanying person) raises his hand on you.</li> <li>- A patient (or an accompanying person) comes dangerously close to you to scream on you.</li> </ul>                                                                                                                                                                                                           |
| Level 4                        | <p>Intentional violence, assault, vandalism or damage to equipment.</p>                                                                                                                                                                                                                                                                                                                                                                                                          |



1  
2  
3 (assaults)

Examples:

4  
5 - An angry patient (or an accompanying person) pushes you.

6  
7 - A patient (or an accompanying person) spits on you.  
8

9  
10 

---

Legend. Examples come from clinical cases used to train the healthcare workers to notify the level any incivility or violence they may be subject.  
11

12  
13  
14  
15  
16  
17  
18  
19  
20  
21  
22  
23  
24  
25  
26  
27  
28  
29  
30  
31  
32  
33  
34  
35  
36  
37  
38  
39  
40  
41  
42  
43  
44  
45  
46

For peer review only

### **Blinding**

Healthcare workers and patients were not blinded to the intervention phase. However, in the absence of individual information on the study (this was not required by the Institutional Review Board), it appears unlikely that patient behaviour was influenced by the study.

### **Sample size**

In the initial protocol the sample size was determined for an on – off design by the expected efficacy of each of the five components of the prevention programme. The statistical unit was the patient admitted to the OED. Based on the initial hypotheses, the total sample size required was 30 224 admissions with a risk alpha of 5% and the statistical power of 80%. We did not recalculate the number of subjects required; there is usually no estimation of the sample size in interrupted time-series studies.<sup>30,31</sup>

### **Statistical methods**

The analyses were conducted on data obtained during the 15-month study period (that corresponded to the pre-intervention and intervention periods and without consideration of the training period). The proportion of admissions with violence committed by patients, or those accompanying them, was expressed as a rate per 1000 admissions. When the perpetrator was someone accompanying the patient, the violence was attributed to the patient.

For all outcomes, we conducted a pre post analysis to compare rates before and during implementation of the prevention programme using chi square tests. In addition, for the primary outcome we performed a segmented regression analysis to account for the possibility of concurrent secular trends in violence which could influence the results. We evaluated the effect of the programme on violence at both the aggregate and individual patient levels.

First, a segmented Poisson regression model offset by the total number of admissions at OED per month was used to compare monthly violence rates between pre and intervention periods. The

1  
2  
3 model included intercept, time trend before implementation, change in level immediately after the  
4 training period, and change in time trend after the training period.

5  
6  
7 Analyses were stratified to allow for differential effects by age group, gender, waiting time and  
8 length of stay. Results were reported as incidence rate ratio (IRR) and 95% confidence intervals (CIs).  
9  
10  
11 Secondly, logistic regression was used to assess change in level and trend of odds of violence  
12 occurrence within admission at OED before and after each intervention after adjusting for individual  
13 characteristics (age, gender, waiting time >2h, admission to OED during public holidays, night  
14 admission, patients with several admissions to OED). A model with generalized equation estimation  
15 with a 1<sup>st</sup> order autoregressive correlation structure was fitted to account for the clustering of  
16 admissions to the OED within a calendar day. Results were reported as odds ratio (OR) and 95% CIs.  
17  
18 All admissions to the OED were treated independently. All p values were 2-sided and statistical  
19 significance level was set at alpha=0.05. Statistical analyses were performed with SAS version 9.4  
20 software (SAS Institute Inc., Cary, NC, USA).  
21  
22  
23  
24  
25  
26  
27  
28  
29  
30  
31

### 32 ***Ethics approval***

33  
34  
35 The Sud Est IV Institutional Review Board's approval was obtained in September 2011 (L11-117).  
36  
37 Under French law in effect at the time of the study, consent was not required for the type of study  
38 and intervention being evaluated.  
39  
40  
41

### 42 ***Reporting criteria***

43  
44  
45 We followed the SQUIRE criteria from the EQUATOR network to report the study.<sup>32</sup>  
46  
47  
48  
49  
50

## 51 **Results**

### 52 ***Participants***

53  
54  
55 Over the 15-month study period, 22 107 admissions (corresponding to 18 826 patients) were  
56 analysed (Figure 1). Among the 18 826 patients, 12% were admitted more than once. The mean  $\pm$   
57  
58  
59  
60

1  
2  
3 standard deviation (SD) number of visits per patient was  $1.2 \pm 0.6$  (range: 1-15), there was a mean 70  
4  
5  $\pm 12$  admissions per day over the 315-day study period (range: 33-105).  
6  
7

### 8 ***Characteristics of admissions***

9

10 Characteristics of admissions according to the components implemented are presented in Table 2.  
11  
12  
13  
14  
15  
16  
17  
18  
19  
20  
21  
22  
23  
24  
25  
26  
27  
28  
29  
30  
31  
32  
33  
34  
35  
36  
37  
38  
39  
40  
41  
42  
43  
44  
45  
46  
47  
48  
49  
50  
51  
52  
53  
54  
55  
56  
57  
58  
59  
60

For peer review only

**Table 2. Characteristics of admissions, waiting time and length of stay.**

|                                        | Pre-intervention<br>period<br>N=4 118 | Intervention period |                 |                  |                   |
|----------------------------------------|---------------------------------------|---------------------|-----------------|------------------|-------------------|
|                                        |                                       | A<br>N=4 403        | A+BC<br>N=4 587 | ABC+D<br>N=4 454 | ABCD+E<br>N=4 545 |
| Male, n (%)                            | 2 250 (54.6)                          | 2 335 (53.0)        | 2 499 (54.5)    | 2 426 (54.5)     | 2 564 (56.4)      |
| Age ≥ 40 years, n (%)                  | 2 159 (52.4)                          | 2 547 (57.8)        | 2 452 (53.5)    | 2 368 (53.2)     | 2 459 (54.1)      |
| Coming during the day, n (%)           | 2 944 (71.5)                          | 3 164 (71.9)        | 3 536 (77.1)    | 3 519 (79.0)     | 3 324 (73.1)      |
| Waiting time > 2h <sup>a</sup> , n (%) | 2 755 (66.9)                          | 2 754 (62.5)        | 2 377 (51.8)    | 2 100 (47.1)     | 2 125 (46.8)      |
| Length of stay > 3h, n (%)             | 2 045 (49.7)                          | 2 481 (56.3)        | 2 002 (43.6)    | 1 601 (35.9)     | 1 595 (35.1)      |

Legend: Coming during the day corresponded to admission between 8 am and 7.59 pm; waiting time was defined as the duration between time of registration of patient's arrival and first time of assessment by a nurse or an ophthalmologist; Length of stay was defined as the duration between registration and discharge. Components: A corresponded to computerized triage algorithm, BC corresponded to signage and messages broadcast, D corresponded to mediator and E corresponded to video surveillance.

<sup>a</sup> waiting time was not documented for 108 admissions.

### **Outcomes**

A total of 376 acts of violence corresponding to 272 admissions (1.4% of 22 107 admissions) were recorded during the total study period (Table 3). Among the 272 admissions concerned, 74% (n=202) had led to one act of violence, 16% (n=45) had led to two acts, and 10% (n=25) had led to three or more acts. In the pre-intervention period, 98.6% acts of violence were incivility or verbal harassment and 1.4% were threats. In the intervention period, all acts of violence were incivility or verbal harassment.

For peer review only

**Table 3. Characteristics of acts of violence reported by healthcare workers.**

|                                                      | Pre-intervention<br>period<br>N=4 118 | Intervention period after a 3-month training |                 |                  |                   |
|------------------------------------------------------|---------------------------------------|----------------------------------------------|-----------------|------------------|-------------------|
|                                                      |                                       | A<br>N=4 403                                 | A+BC<br>N=4 587 | ABC+D<br>N=4 454 | ABCD+E<br>N=4 545 |
| Rate of act of violence per 1000 admissions (95%CI)* | 24.8 (20.0-29.5)                      | 10.0 (7.1-12.9)                              | 8.9 (6.2-11.7)  | 8.1 (5.5-10.7)   | 10.8 (7.8-13.8)   |
| Act of violence**, n                                 | 143                                   | 54                                           | 51              | 56               | 72                |
| Level of violence, n (%)                             |                                       |                                              |                 |                  |                   |
| Level 1 (incivility)                                 | 131 (91.6)                            | 46 (85.2)                                    | 45 (88.2)       | 43 (76.8)        | 65 (90.3)         |
| Level 2 (verbal harassment)                          | 10 (7.0)                              | 7 (13.0)                                     | 5 (9.8)         | 13 (23.2)        | 7 (9.7)           |
| Level 3 (threats)                                    | 2 (1.4)                               | 1 (1.9)                                      | 1 (2.0)         | 0 (0)            | 0 (0)             |
| Level 4 (assaults)                                   | 0 (0)                                 | 0 (0)                                        | 0 (0)           | 0 (0)            | 0 (0)             |
| Committed by patient, n (%)                          | 98 (68.5)                             | 43 (79.6)                                    | 35 (68.6)       | 38 (67.9)        | 53 (73.6)         |
| Healthcare worker as the victim***, n (%)            | 140 (97.9)                            | 51 (94.4)                                    | 48 (94.1)       | 54 (96.4)        | 72 (100)          |

\* Rate of act of violence was defined as the percentage of admissions per period with at least one act of violence reported.

1  
2  
3 \*\* Several acts of violence could be occurred per admission.  
4

5 \*\*\* 6 acts of violence were committed between patients and the victim was not documented for 5 acts of violence.  
6

7  
8 Components: A corresponded to computerized triage algorithm, BC corresponded to signage and messages broadcast, D corresponded to mediator and E  
9  
10 corresponded to video surveillance cameras.

11  
12 Abbreviation: CI: Confidence Interval.  
13  
14  
15  
16  
17  
18  
19  
20  
21  
22  
23  
24  
25  
26  
27  
28  
29  
30  
31  
32  
33  
34  
35  
36  
37  
38  
39  
40  
41  
42  
43  
44  
45  
46

For peer review only



### *Primary outcome*

The rate of violence significantly decreased from 24.8 (95%CI: 20.0 to 29.5) admissions with violence per 1000 admissions in pre-intervention period to 9.5 (95%CI: 8.0 to 10.9) acts of violence per 1000 admissions in intervention period ( $p<0.001$ ). The effects of the components on monthly violence rates are presented in Figure 2.

### *Secondary outcomes*

The frequency of admissions with waiting times  $\geq 2$  hours decreased from 67% (n=2755 admissions) to 52% (n=9356) between the pre-intervention period and the intervention period ( $p<10^{-3}$ ). For the length of stay, frequency of admissions with a stay  $\geq 3$  hours decreased from 50% (n=2045) to 43% (n=7679;  $p<10^{-3}$ ).

### *Segmented regression analysis*

According to the Poisson regression analyses, no pre-intervention trend was seen in monthly violence rates (IRR=1.13, 95%CI: 0.87 to 1.46,  $p=0.3243$ ). After accounting for underlying trends, an immediate 53% decrease (IRR=0.47, 95%CI: 0.27 to 0.82,  $p=0.0121$ ) was observed in the violence rate of the first month following the training period. No monthly trend effects in overall intervention period was detected (IRR=0.97, 95%CI: 0.92 to 1.02,  $p=0.1660$ ). Poisson regression results stratified by admission's characteristics are presented in a table 4. Following the training period, a similar immediate decrease was found for female (IRR=0.35, 95%CI: 0.15 to 0.83,  $p=0.0212$ ), age  $<40$  years (IRR=0.43, 95%CI: 0.19 to 0.99,  $p=0.0471$ ), waiting time  $>2$  hours (IRR=0.49, 95%CI: 0.26 to 0.92,  $p=0.0306$ ), and length of stay  $>3$  hours (IRR=0.38, 95%CI: 0.20 to 0.74,  $p=0.0089$ ). No monthly trend effect in the intervention period was observed for all subgroups.

**Table 4. Multivariate analysis\* of the comprehensive prevention programme on violence rates by admissions characteristics.**

| Characteristics | Pre-intervention trend<br>(per month)** |         | Change in level*** |         | Change in trend<br>(per month)**** |         |
|-----------------|-----------------------------------------|---------|--------------------|---------|------------------------------------|---------|
|                 | IRR [95%CI]                             | p-value | IRR [95%CI]        | p-value | IRR [95%CI]                        | p-value |
| Sex             |                                         |         |                    |         |                                    |         |
| Male            | 1.05 [0.76;1.46]                        | 0.7500  | 0.59 [0.28;1.20]   | 0.1308  | 0.95 [0.89;1.01]                   | 0.0810  |
| Female          | 1.27 [0.84;1.93]                        | 0.2343  | 0.35 [0.15;0.83]   | 0.0212  | 1.00 [0.93;1.07]                   | 0.9548  |
| Age             |                                         |         |                    |         |                                    |         |
| <40 yrs         | 1.11 [0.78;1.58]                        | 0.5292  | 0.43 [0.19;0.99]   | 0.0471  | 0.96 [0.90;1.04]                   | 0.2771  |
| ≥ 40 yrs        | 1.16 [0.79;1.69]                        | 0.4107  | 0.51 [0.24;1.08]   | 0.0730  | 0.97 [0.92;1.04]                   | 0.3601  |
| Waiting time    |                                         |         |                    |         |                                    |         |
| ≤2h             | 1.11 [0.67;1.85]                        | 0.6468  | 0.39 [0.13;1.18]   | 0.0892  | 0.96 [0.88;1.05]                   | 0.3427  |
| >2h             | 1.12 [0.83;1.51]                        | 0.4233  | 0.49 [0.26;0.92]   | 0.0306  | 0.99 [0.94;1.04]                   | 0.6704  |
| Length of stay  |                                         |         |                    |         |                                    |         |
| ≤3h             | 1.03 [0.66;1.62]                        | 0.8738  | 0.57 [0.22;1.51]   | 0.2329  | 0.96 [0.89;1.04]                   | 0.2823  |
| >3h             | 1.13 [0.82;1.55]                        | 0.4231  | 0.38 [0.20;0.74]   | 0.0089  | 1.00 [0.94;1.06]                   | 0.9764  |

Abbreviations: IRR: Incidence rate ratio, CI: Confidence interval.

1  
2  
3 \* segmented Poisson regression offset by the total number of admissions at OED per month. RR <1 represents a decline and inversely

4  
5 RR>1 represents an increase in monthly violence rate.

6  
7 \*\* rate of change in monthly violence rate prior the intervention (i.e. time effect).

8  
9 \*\*\* immediate change in the mean monthly violence rate from pre intervention to intervention period.

10  
11 \*\*\*\* change in slope per month following to the intervention period.  
12  
13  
14  
15  
16  
17  
18  
19  
20  
21  
22  
23  
24  
25  
26  
27  
28  
29  
30  
31  
32  
33  
34  
35  
36  
37  
38  
39  
40  
41  
42  
43  
44  
45  
46

### *Piecewise logistic regression analysis*

Piecewise logistic regression analysis confirmed the absence of pre-intervention trend (see table 5).

Following the training period, three components of the programme had significant effects on the underlying trend of violence occurrence. There was a significant decline in the odds of violence occurrence over time after the implementation of component A-Algorithm (adjusted odds ratio [aOR]= 0.87, 95%CI: 0.82-0.91,  $p<10^{-3}$ ). The trend toward decreasing occurrence of violence over time significantly reversed in the 3 months following the implementation of component D-Mediators (aOR= 1.45, 95%CI: 1.14-1.84,  $p=0.002$ ) indicating a significant increase over time after the implementation of a mediator. The trend significantly reversed following component E- video surveillance (aOR= 0.65, 95%CI: 0.45-0.93,  $p=0.019$ ) suggesting that the magnitude of increase in occurrence of violence decreased over time and returned at its previous level (aOR= 0.84, 95%CI: 0.66-1.07,  $p=0.152$ ). No effect was observed for the component BC combining signage and messages broadcast on TV in the waiting rooms.

**Table 5. Piecewise logistic regression analysis of the comprehensive prevention programme effects\* on violence.**

|                                         | Full model**        |         | Simple model***    |         |
|-----------------------------------------|---------------------|---------|--------------------|---------|
|                                         | OR [95%CI]          | p-value | OR [95%CI]         | p-value |
| Trend prior to intervention (per month) | 1.09 [0.81 ; 1.49]  | 0.5848  | --                 | --      |
| Immediate change in level:              |                     |         |                    |         |
| A                                       | 0.31 [0.03 ; 3.20]  | 0.3236  | --                 | --      |
| BC added to A                           | 2.19 [0.70 ; 6.82]  | 0.1773  | --                 | --      |
| D added to ABC                          | 1.05 [0.28 ; 3.88]  | 0.9406  | --                 | --      |
| E added to ABCD                         | 5.73 [2.08 ; 15.77] | 0.0007  | --                 | --      |
| Change in trend (per month):            |                     |         |                    |         |
| A                                       | 0.95 [0.55 ; 1.65]  | 0.8657  | 0.87 [0.82 ; 0.92] | <.0001  |
| BC added at A                           | 0.61 [0.33 ; 1.13]  | 0.1188  | --                 | --      |
| D added at ABC                          | 1.85 [0.98 ; 3.48]  | 0.0572  | 1.45 [1.14 ; 1.84] | 0.0022  |
| E added at ABCD                         | 0.35 [0.17 ; 0.70]  | 0.0031  | 0.65 [0.45 ; 0.93] | 0.0194  |

Abbreviations: OR: odds ratio, CI: Confidence interval.

Components: A corresponded to computerized triage algorithm, BC corresponded to signage and messages broadcast on TV in the waiting rooms, D corresponded to mediator and E corresponded to video surveillance cameras.

1  
2  
3 \*logistic generalized estimating equation model adjusted for waiting time > 2h. OR <1 represent a decline and inversely OR>1 represent an increase in  
4  
5 monthly likelihood of violence occurrence during admission at OED per month.  
6

7  
8 \*\*full model included time effect and immediate changes after each component's implementation and changes in slopes.  
9

10 \*\*\*parsimonious model after backward selection.  
11  
12  
13  
14  
15  
16  
17  
18  
19  
20  
21  
22  
23  
24  
25  
26  
27  
28  
29  
30  
31  
32  
33  
34  
35  
36  
37  
38  
39  
40  
41  
42  
43  
44  
45  
46

For peer review only

## Discussion

The present study found a significant reduction in self-reported incivility or verbal violence by healthcare workers following the implementation of a comprehensive prevention programme. This reduction occurred after the implementation of the first component of the programme, a triage algorithm, and was maintained over time while other components were successively implemented. The violence rate during the pre-intervention period found in the present study (24.8 per 1000 admissions) was higher than that reported. In a recent meta-analysis of 22 studies; the authors found a pooled incidence of 36 per 10,000 admissions (range: 1 to 172 per 10,000 admissions).<sup>33</sup> It is, however, difficult to compare the results of the present study with those reported elsewhere due to heterogeneity in the way violence is defined, collected and reported in the literature; for a majority of studies, data collection was conducted retrospectively, using security records and incident report documents that mainly report severe acts of violence.<sup>33</sup>

Previous studies reported a low rate of acts of violence with a high level of severity (threats and assaults).<sup>34,33</sup> In the present study, the frequency of such acts were even lower; only four acts of verbal or physical threat and no assault. This can be explained by the context of the OED which did not admit patients for drug/alcohol abuse or psychiatric disease which are predictor of physical violence perpetrated by patient against healthcare workers.<sup>35</sup> However, as in other studies, verbal harassment or incivility committed by patients were the most frequent form of violence experienced herein despite differences in methodology.<sup>36,37,38</sup> Concomitantly, waiting times and length of stay of patients in the OED were significantly reduced. The reduction of waiting times was an expected effect of the triage algorithm, which allowed, according to the reason for consultation, for orthoptists to perform examinations such as dilating pupils without having to consult a physician. Associated with a patient call system in the waiting room, the triage algorithm was a mean streamline the order of passage and waiting time and thus reduce the stressful condition in waiting rooms.<sup>35</sup> It was not

1  
2  
3 related to a change in the number of professionals (which remained stable throughout the study) nor  
4  
5 to a change in the number of admissions to OED.  
6

7 As recommended, the prevention programme combined different components, targeting regularly  
8  
9 cited causes of violence.<sup>24</sup> The intervention targeted patients/visitors and the environment, but did  
10  
11 not target how OED professionals handle violent situations.<sup>38,39,40</sup> Behaviour of healthcare  
12  
13 professionals such as empathic communication, early proactive interaction, and verbal and body  
14  
15 language expressing respect and confidence are associated with a reduction in incivility and verbal  
16  
17 abuse or aggressive behaviour.<sup>28,35,41</sup>  
18

19  
20 Caution should, however, be taken when interpreting the results of the present study. It is not  
21  
22 possible to distinguish the relative effect of the tested components. For instance, a positive effect  
23  
24 was observed during the implementation of the first component (triage algorithm linked to a waiting  
25  
26 room patient call system). It is not possible to conclude whether this effect was due to the algorithm  
27  
28 or to the fact that it was implemented first. Another point to consider is that violence increased  
29  
30 despite the presence of the mediator. To the best of our knowledge, there was no change in the  
31  
32 conditions of patient reception (i.e. no increase in waiting times or in admission frequency and no  
33  
34 change in the OED team) during the implementation of the mediator that could explain this  
35  
36 unintended effect. The mediator, by his/her presence, may have stimulated the declaration of  
37  
38 violence by healthcare workers. It points out the difficulty to collect non-physical acts of violence  
39  
40 which are underreported by healthcare staff. Main reasons are: it is so prevalent yet rarely results in  
41  
42 physical injury, most of professionals consider it as part of their jobs, these acts of violence are  
43  
44 subject to personal interpretation, and the use of existing reporting systems is time-consuming and  
45  
46 perceived as unnecessary because it does not lead to any action to reduce these  
47  
48 behaviours.<sup>24,28,41,42,43</sup> To limit variation in reporting practices, the researchers met monthly with the  
49  
50 OED team to discuss the importance of reporting events from least (incivility) to most severe  
51  
52 (assault). Moreover reporting was facilitated by its integration in the patient records.  
53  
54  
55  
56  
57  
58  
59  
60



1  
2  
3 Moreover, we conducted a segmented regression analysis to detect if the programme had a greater  
4 effect than an underlying secular trend.<sup>30,31,44,45,46</sup> The analysis is limited by the short pre-intervention  
5 phase, which does not allow a solid estimation of the trend before the programme implementation.  
6  
7

8  
9  
10 Second, a longer post-intervention follow-up could have been useful to verify the effectiveness of the  
11 program at a distance of time from its implementation.<sup>47</sup> A longer observation could have helped to  
12 explain whether the increase in the reports after the implementation of the mediator is a real  
13 phenomenon (increase of the violence) or not (greater attention to violence). A qualitative approach  
14 would have also helped us to better understand the mechanisms of action of the programme  
15 components,<sup>48</sup> in particular the paradoxical effect of the mediator. It would have allowed us to  
16 evaluate whether the coping of the healthcare workers with the violence has improved. Finally, the  
17 generalization of the results is limited by the single-centre study design and by the differences  
18 between the OEDs and general emergencies. In particular, there are no admissions for psychiatric or  
19 drug abuse and alcohol problems, which are known to be sources of violence.<sup>33,35</sup>  
20  
21  
22  
23  
24  
25  
26  
27  
28  
29  
30  
31

32 In conclusion, a comprehensive prevention programme targeting patients, visitors and environment  
33 can reduce self-reported incivility and verbal violence by healthcare workers in an OED over 12  
34 months. EDs should develop comprehensive primary prevention programme that integrate various  
35 environmental and patient-oriented components (organisational, educational, relational, security).  
36  
37  
38  
39  
40  
41  
42  
43  
44  
45  
46  
47  
48  
49  
50  
51  
52  
53  
54  
55  
56  
57  
58  
59  
60

### Author contributions

The study was conceptualized and designed by ST, PLC, MALP, and ADu.

PLC and CB are the Co-Chief Investigators, provided leadership for the project.

ST, PLC, JBF, and ADu contributed to the development of the programme.

ST, PO, and ADe planned the statistical analysis.

ADe carried out the statistical analyses.

ST, PO, and ADe drafted the manuscript.

All authors reviewed the draft version, made suggestions, and approved the final version.

### Funding

This study was supported by a grant from the Programme de Recherche en Qualité Hospitalière 2011 (PRQH 2011- D50794) of the French ministry of health (Ministère chargé de la Santé, Direction de l'Hospitalisation et de l'Organisation des Soins). The funder had no role in study design, data collection, data analysis, decision to publish, or writing of the manuscript.

### Acknowledgments

We thank the OED team. We also acknowledge the hard work and the active support of Sylvie Sullerot, advance practice nurse of the OED, Daniel Betito, computer scientist, for the implementation of the algorithm in the hospital information system, Hélène Janin-Magnificat, physician, for her support of the study and the students of the communication school of Lyon for the creation of the messages broadcast on TV in the waiting rooms.

The authors are grateful to Philip Robinson for help in manuscript preparation.

### Competing Interests

None declared.

### Patient consent

Not required.

### Data statement

The data set is not available as ethics approval does not allow release.

## Figures

### Figure 1. Study flow chart of admissions at Ophthalmology Emergency Department.

Legend: Components: A: computerized triage algorithm, BC: signage and messages broadcast on TV in the waiting rooms, D: mediator, E: video surveillance.

### Figure 2. Observed time series of the A) rates of admission at OED with acts of violence, B) total number of admissions at OED and C) rates of admissions with waiting time greater than 2 hours by month before and during implementation of the prevention programme.

Abbreviation: OED: Ophthalmology Emergency Department

Legend: the grey band represents the 3-month training period. The dotted lines inside the scatter plots represents the implementation of component A (computerized triage algorithm), component BC (signage and messages broadcast on TV in the waiting rooms), component D (mediator) and component E (video surveillance).

## References

---

- 1 Bureau of Labor Statistics. News release: Nonfatal occupational injuries and illnesses requiring days away from work. United State Department of Labor (USDL 15-2205). Last Modified Date: November 10, 2016. Retrieved from <http://www.bls.gov/news.release/pdf/osh2.pdf>. Accessed May 26, 2018.
- 2 Kuehn BM. Violence in health care settings on rise. *JAMA* 2010;304:511–2.
- 3 Magnavita N, Heponiemi T. Violence towards health care workers in a Public Health Care Facility in Italy: a repeated cross-sectional study. *BMC Health Services Res* 2012;12:108.
- 4 Arnetz JE, Aranyos D, Ager J, et al. Development and application of a population-based system for workplace violence surveillance in hospitals. *Am J Ind Med* 2011;54:925–34.
- 5 Lau JB, Magarey J, McCutcheon H. Violence in the emergency department: a literature review. *Aust Emerg Nurs J* 2004;7:27–37.
- 6 Gates DM, Ross CS, McQueen L. Violence against emergency department workers. *J Emerg Med* 2006;31:331–7.
- 7 Kowalenko T, Cunningham R, Sachs CJ, et al. Workplace violence in emergency medicine: current knowledge and future directions. *J Emerg Med* 2012;43:523–31.
- 8 Winstanley S, Whittington R. Aggression towards health care staff in a UK general hospital: variation among professions and departments. *J Clin Nurs* 2004;13:3-10.
- 9 Ryan D, Maguire J: Aggression and violence - a problem in Irish Accident and Emergency departments? *J Nurs Manag* 2006, 14:106-15.
- 10 Crilly J, Chaboyer W, Creedy D: Violence towards emergency department nurses by patients. *Accid Emerg Nurs* 2003, 12:67–73.
- 11 Behnam M, Tillotson RD, Davis SM, et al. Violence in the emergency department: a national survey of emergency medicine residences and attending physicians. *J Emerg Med* 2011;40:565–79.
- 12 Arnetz JE, Hamblin L, Ager J, Luborsky M, Upfal MJ, Russell J, Essenmacher L. Underreporting of Workplace Violence: Comparison of Self-Report and Actual Documentation of Hospital Incidents.

1  
2  
3  
4  
5 *Workplace Health Saf* 2015;63:200-10.

6  
7 <sup>13</sup> Ramacciati N, Gili A, Mezzetti A, et al. Violence towards Emergency Nurses: The 2016 Italian  
8 National Survey-A cross-sectional study. *J Nurs Manag* 2019;27:792-805.

9  
10  
11 <sup>14</sup> Observatoire National des Violences en milieu de Santé. La prévention des atteintes aux personnes  
12 et aux biens en milieu de santé. Guide méthodologique. Ed. Direction Générale de l'Offre de Soins.  
13  
14  
15  
16  
17  
18  
19  
20  
21  
22  
23  
24  
25  
26  
27  
28  
29  
30  
31  
32  
33  
34  
35  
36  
37  
38  
39  
40  
41  
42  
43  
44  
45  
46  
47  
48  
49  
50  
51  
52  
53  
54  
55  
56  
57  
58  
59  
60

Avril 2017. 108 p. Available at: [http://solidarites-sante.gouv.fr/IMG/pdf/guide\\_onvs\\_-\\_prevention\\_atteintes\\_aux\\_personnes\\_et\\_aux\\_biens\\_2017-04-27.pdf](http://solidarites-sante.gouv.fr/IMG/pdf/guide_onvs_-_prevention_atteintes_aux_personnes_et_aux_biens_2017-04-27.pdf). Accessed May 26, 2018.

<sup>15</sup> Lyneham J. Violence in New South Wales emergency departments. *Aust J Adv Nurs* 2000;18:8-17.

<sup>16</sup> Needham I, Abderhalden C, Halfens RJG, et al. Non-somatic effects of patient aggression on nurses:  
a systematic review. *J Adv Nurs* 2005;49:283-96.

<sup>17</sup> Wallace JE, Lemaire JB, Ghali WA. Physician wellness: a missing quality indicator. *Lancet*  
2009;374:1714-21.

<sup>18</sup> Gates DM, Gillespie GL, Succop P. Violence against nurses and its impact on stress and productivity.  
*Nurs Econ* 2011;29:59-66.

<sup>19</sup> Magnavita N. Workplace violence and occupational stress in healthcare workers: a chicken-and-  
egg situation-results of a 6-year follow-up study. *J Nurs Scholarsh* 2014;46:366-76.

<sup>20</sup> Khangura JK, Flodgren G, Perera R, et al. Primary care professionals providing non-urgent care in  
hospital emergency departments. *Cochrane Database Syst Rev* 2012;11:CD002097.

<sup>21</sup> Garnham P: Understanding and dealing with anger, aggression and violence. *Nurs Stand*  
2001;16:37-42.

<sup>22</sup> Hodge AN, Marshall AP: Violence and aggression in the emergency department: a critical care  
perspective. *Aust Crit Care* 2007;20:61-7.

<sup>23</sup> Gates D, Gillespie G, Smith C, et al. Using action research to plan a violence prevention program for  
emergency departments. *J Emerg Nurs* 2011;37:32-9.

- 1  
2  
3  
4  
5 <sup>24</sup> Ramacciati N, Ceccagnoli A, Addey B, et al. Interventions to reduce the risk of violence toward  
6  
7 emergency department staff: current approaches. *Open Access Emerg Med* 2016;8:17-27.  
8  
9 <sup>25</sup> Soremekun OA, Capp R, Biddinger PD, et al. Impact of physician screening in the emergency  
10  
11 department on patient flow. *J Emerg Med* 2012;43:509-15.  
12  
13 <sup>26</sup> Morphet J, Griffiths D, Plummer V, et al. At the crossroads of violence and aggression in the  
14  
15 emergency department: perspectives of Australian emergency nurses. *Aust Health Rev* 2014;38:194-  
16  
17 201.  
18  
19 <sup>27</sup> Weiland TJ, Ivory S, Hutton J. Managing Acute Behavioural Disturbances in the Emergency  
20  
21 Department Using the Environment, Policies and Practices: A Systematic Review. *West J Emerg Med*  
22  
23 2017;18:647-661.  
24  
25 <sup>28</sup> d'Aubarede C, Sarnin P, Cornut PL, et al. Impacts of users' antisocial behaviors in an ophthalmologic  
26  
27 emergencydepartment--a qualitative study. *J Occup Health* 2016;58:96-106.  
28  
29 <sup>29</sup> Touzet S, Cornut PL, Fassier JB, et al. Impact of a program to prevent incivility towards and assault  
30  
31 of healthcare staff in an ophtalmological emergency unit: study protocol for the PREVURGO On/Off  
32  
33 trial. *BMC Health Serv Res* 2014;14:221.  
34  
35 <sup>30</sup> Wagner AK, Soumerai SB, Zhang F, et al. Segmented regression analysis of interrupted time series  
36  
37 studies in medication use research. *J Clin Pharm Ther* 2002;27:299-309.  
38  
39 <sup>31</sup> Bernal JL, Cummins S, Gasparrini A. Interrupted time series regression for the evaluation of public  
40  
41 health interventions: a tutorial. *Int J Epidemiol* 2017;46:348-355.  
42  
43 <sup>32</sup> Ogrinc G, Davies L, Goodman D, et al. SQUIRE 2.0 (Standards for QUality Improvement Reporting  
44  
45 Excellence): revised publication guidelines from a detailed consensus process. *BMJ Qual Saf*  
46  
47 2016;25:986-992.  
48  
49 <sup>33</sup> Nikathil S, Olausson A, Gocentas RA, et al. Review article: Workplace violence in the emergency  
50  
51 department: A systematic review and meta analysis. *Emerg Med Australas* 2017;29:265-275.  
52  
53  
54  
55  
56  
57  
58  
59  
60

- 1  
2  
3  
4  
5 <sup>34</sup> Maguire BJ, O'Meara P, O'Neill BJ, et al. Violence against emergency medical services personnel: A  
6  
7 systematic review of the literature. *Am J Ind Med* 2018;61:167-180.  
8  
9 <sup>35</sup> D'Ettorre G, Pellicani V, Mazzotta M, et al. Preventing and managing workplace violence against  
10  
11 healthcare workers in Emergency Departments. *Acta Biomed* 2018;89(4-S):28-36.  
12  
13 <sup>36</sup> Tadros A, Kiefer C. Violence in the Emergency Department: A Global Problem. *Psychiatr Clin North*  
14  
15 *Am* 2017;40:575-584.  
16  
17 <sup>37</sup> Kowalenko T, Gates D, Gillespie GL, et al. Prospective study of violence against ED workers. *Am J*  
18  
19 *Emerg Med* 2013;31:197-205.  
20  
21 <sup>38</sup> Gillespie GL, Gates DM, Kowalenko T, et al. Implementation of a comprehensive intervention to  
22  
23 reduce physical assaults and threats in the emergency department. *J Emerg Nurs* 2014;40:586-91.  
24  
25 <sup>39</sup> Fernandes CM, Raboud JM, Christenson JM, et al. Violence in the Emergency Department Study  
26  
27 (VITES) Group. The effect of an education program on violence in the emergency department. *Ann*  
28  
29 *Emerg Med* 2002;39:47-55.  
30  
31 <sup>40</sup> Gillespie GL, Farra SL, Gates DM. A workplace violence educational program: a repeated measures  
32  
33 study. *Nurse Educ Pract* 2014;14:468-72.  
34  
35 <sup>41</sup> Ramacciati N, Ceccagnoli A, Addey B, et al. Violence towards emergency nurses: A narrative review  
36  
37 of theories and frameworks. *Int Emerg Nurs* 2018;39:2-12.  
38  
39 <sup>42</sup> Copeland D, Henry M. Workplace Violence and Perceptions of Safety Among Emergency  
40  
41 Department Staff Members: Experiences, Expectations, Tolerance, Reporting, and  
42  
43 Recommendations. *J Trauma Nurs* 2017;24:65-77.  
44  
45 <sup>43</sup> Pich J, Hazelton M, Sundin D, et al. Patient-related violence against emergency department nurses.  
46  
47 *Nurs Health Sci* 2010;12:268-74.  
48  
49 <sup>44</sup> Ramsey CR, Matowe L, Grilli R, et al. Interrupted time series designs in health technology  
50  
51 assessment: lessons from two systematic reviews of behaviour change strategies. *Int J Technol Assess*  
52  
53 *Health Care* 2003;19:613-623.  
54  
55  
56  
57  
58  
59  
60

1  
2  
3  
4  
5 <sup>45</sup> Lagarde M. How to do (or not to do) ... Assessing the impact of a policy change with routine  
6  
7 longitudinal data. *Health Policy Plan* 2012;27:76-83.

8  
9 <sup>46</sup> Penfold RB, Zhang. Use of interrupted time series analysis in evaluating health care quality  
10  
11 improvements. *Academic paediatrics* 2003;13:S38-S44.

12  
13  
14 <sup>47</sup> Magnavita N. Violence prevention in a small-scale psychiatric unit. Program planning and  
15  
16 evaluation. *Int J Occup Environ Health* 2011;17(4):336-44.

17  
18 <sup>48</sup> Guével MR, Pommier J. Mixed methods research in public health: issues and illustration. *Sante*  
19  
20 *Publique* 2012;24:23-38.  
21  
22  
23  
24  
25  
26  
27  
28  
29  
30  
31  
32  
33  
34  
35  
36  
37  
38  
39  
40  
41  
42  
43  
44  
45  
46  
47  
48  
49  
50  
51  
52  
53  
54  
55  
56  
57  
58  
59  
60



1  
2  
3  
4  
5  
6  
7  
8  
9  
10  
11  
12  
13  
14  
15  
16  
17  
18  
19  
20  
21  
22  
23  
24  
25  
26  
27  
28  
29  
30  
31  
32  
33  
34  
35  
36  
37  
38  
39  
40  
41  
42  
43  
44  
45  
46  
47  
48  
49  
50  
51  
52  
53  
54  
55  
56  
57  
58  
59  
60

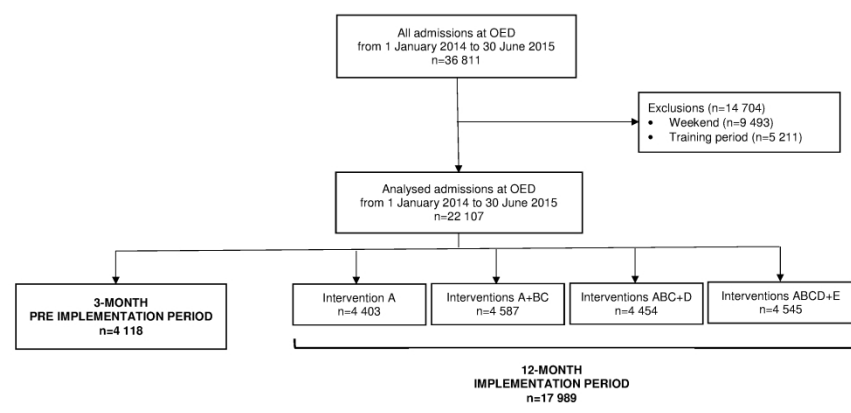

Study flow chart of admissions at Ophthalmology Emergency Department.  
 Legend: Components: A: computerised triage algorithm, BC: signage and messages broadcast on TV in the waiting rooms, D: mediator, E: video surveillance.

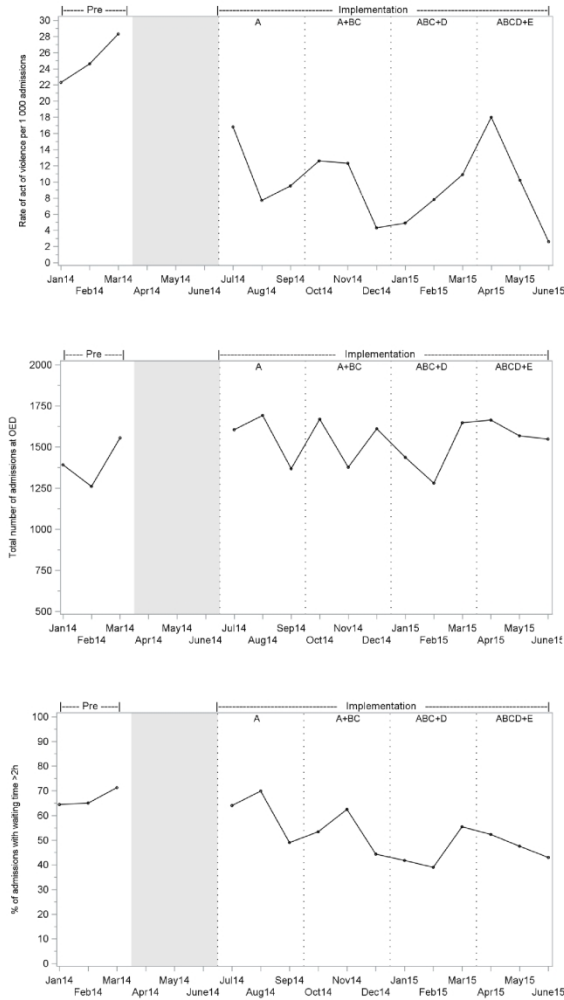

Observed time series of the A) rates of admission at OED with acts of violence, B) total number of admissions at OED and C) rates of admissions with waiting time greater than 2 hours by month before and during implementation of the prevention program.

Abbreviation: OED: Ophthalmology Emergency Department

Legend: the grey band represents the 3-month training period. The dotted lines inside the scatter plots represents the implementation of component A (computerised triage algorithm), component BC (signage and messages broadcast on TV in the waiting rooms), component D (mediator) and component E (video surveillance).

209x297mm (300 x 300 DPI)

# Reporting checklist for quality improvement study.

Based on the SQUIRE guidelines.

## Instructions to authors

Complete this checklist by entering the page numbers from your manuscript where readers will find each of the items listed below.

Your article may not currently address all the items on the checklist. Please modify your text to include the missing information. If you are certain that an item does not apply, please write "n/a" and provide a short explanation.

Upload your completed checklist as an extra file when you submit to a journal.

In your methods section, say that you used the SQUIRE reporting guidelines, and cite them as:

Ogrinc G, Davies L, Goodman D, Batalden P, Davidoff F, Stevens D. SQUIRE 2.0 (Standards for QUality Improvement Reporting Excellence): revised publication guidelines from a detailed consensus process

|                     | Reporting Item                                                                                                                                                                                                                      | Page Number |
|---------------------|-------------------------------------------------------------------------------------------------------------------------------------------------------------------------------------------------------------------------------------|-------------|
|                     | #1 Indicate that the manuscript concerns an initiative to improve healthcare (broadly defined to include the quality, safety, effectiveness, patientcenteredness, timeliness, cost, efficiency, and equity of healthcare)           | 1           |
|                     | #02a Provide adequate information to aid in searching and indexing                                                                                                                                                                  | 1           |
|                     | #02b Summarize all key information from various sections of the text using the abstract format of the intended publication or a structured summary such as: background, local problem, methods, interventions, results, conclusions | 1           |
| Problem description | #3 Nature and significance of the local problem                                                                                                                                                                                     | 6           |
| Available knowledge | #4 Summary of what is currently known about the problem, including relevant previous studies                                                                                                                                        | 5           |
| Rationale           | #5 Informal or formal frameworks, models, concepts, and / or theories used to explain the problem, any reasons or                                                                                                                   | 5 - 6       |

|    |                 |                                                                          |          |
|----|-----------------|--------------------------------------------------------------------------|----------|
| 1  |                 | assumptions that were used to develop the intervention(s), and           |          |
| 2  |                 | reasons why the intervention(s) was expected to work                     |          |
| 3  |                 |                                                                          |          |
| 4  | Specific aims   | #6 Purpose of the project and of this report                             | 6        |
| 5  |                 |                                                                          |          |
| 6  | Context         | #7 Contextual elements considered important at the outset of             | 7        |
| 7  |                 | introducing the intervention(s)                                          |          |
| 8  |                 |                                                                          |          |
| 9  |                 |                                                                          |          |
| 10 | Intervention(s) | #08a Description of the intervention(s) in sufficient detail that others | 8        |
| 11 |                 | could reproduce it                                                       |          |
| 12 |                 |                                                                          |          |
| 13 |                 |                                                                          |          |
| 14 |                 | #08b Specifics of the team involved in the work                          | 8        |
| 15 |                 |                                                                          |          |
| 16 | Study of the    | #09a Approach chosen for assessing the impact of the intervention(s)     | 6        |
| 17 | Intervention(s) |                                                                          |          |
| 18 |                 |                                                                          |          |
| 19 |                 |                                                                          |          |
| 20 |                 | #09b Approach used to establish whether the observed outcomes            | 6, 12,13 |
| 21 |                 | were due to the intervention(s)                                          |          |
| 22 |                 |                                                                          |          |
| 23 |                 |                                                                          |          |
| 24 | Measures        | #10a Measures chosen for studying processes and outcomes of the          | 9        |
| 25 |                 | intervention(s), including rationale for choosing them, their            |          |
| 26 |                 | operational definitions, and their validity and reliability              |          |
| 27 |                 |                                                                          |          |
| 28 |                 |                                                                          |          |
| 29 |                 | #10b Description of the approach to the ongoing assessment of            | 9        |
| 30 |                 | contextual elements that contributed to the success, failure,            |          |
| 31 |                 | efficiency, and cost                                                     |          |
| 32 |                 |                                                                          |          |
| 33 |                 |                                                                          |          |
| 34 |                 | #10c Methods employed for assessing completeness and accuracy            | 9        |
| 35 |                 | of data                                                                  |          |
| 36 |                 |                                                                          |          |
| 37 |                 |                                                                          |          |
| 38 | Analysis        | #11a Qualitative and quantitative methods used to draw inferences        | 12,13    |
| 39 |                 | from the data                                                            |          |
| 40 |                 |                                                                          |          |
| 41 |                 |                                                                          |          |
| 42 |                 | #11b Methods for understanding variation within the data, including      | 12,13    |
| 43 |                 | the effects of time as a variable                                        |          |
| 44 |                 |                                                                          |          |
| 45 |                 |                                                                          |          |
| 46 | Ethical         | #12 Ethical aspects of implementing and studying the intervention(s)     | 15,30    |
| 47 | considerations  | and how they were addressed, including, but not limited to,              |          |
| 48 |                 | formal ethics review and potential conflict(s) of interest               |          |
| 49 |                 |                                                                          |          |
| 50 |                 |                                                                          |          |
| 51 |                 | #13a Initial steps of the intervention(s) and their evolution over time  | See note |
| 52 |                 | (e.g., time-line diagram, flow chart, or table), including               | 1        |
| 53 |                 | modifications made to the intervention during the project                |          |
| 54 |                 |                                                                          |          |
| 55 |                 |                                                                          |          |
| 56 |                 | #13b Details of the process measures and outcome                         | 9        |
| 57 |                 |                                                                          |          |
| 58 |                 |                                                                          |          |
| 59 |                 |                                                                          |          |
| 60 |                 |                                                                          |          |

|    |                |      |                                                                   |          |
|----|----------------|------|-------------------------------------------------------------------|----------|
| 1  |                | #13c | Contextual elements that interacted with the intervention(s)      | 15       |
| 2  |                |      |                                                                   |          |
| 3  |                | #13d | Observed associations between outcomes, interventions, and        | 20       |
| 4  |                |      | relevant contextual elements                                      |          |
| 5  |                |      |                                                                   |          |
| 6  |                |      |                                                                   |          |
| 7  |                | #13e | Unintended consequences such as unexpected benefits,              | See note |
| 8  |                |      | problems, failures, or costs associated with the intervention(s). | 2        |
| 9  |                |      |                                                                   |          |
| 10 |                |      |                                                                   |          |
| 11 |                | #13f | Details about missing data                                        | See note |
| 12 |                |      |                                                                   | 3        |
| 13 |                |      |                                                                   |          |
| 14 |                |      |                                                                   |          |
| 15 | Summary        | #14a | Key findings, including relevance to the rationale and specific   | 27       |
| 16 |                |      | aims                                                              |          |
| 17 |                |      |                                                                   |          |
| 18 |                | #14b | Particular strengths of the project                               | 27       |
| 19 |                |      |                                                                   |          |
| 20 |                |      |                                                                   |          |
| 21 | Interpretation | #15a | Nature of the association between the intervention(s) and the     | 27       |
| 22 |                |      | outcomes                                                          |          |
| 23 |                |      |                                                                   |          |
| 24 |                | #15b | Comparison of results with findings from other publications       | 27       |
| 25 |                |      |                                                                   |          |
| 26 |                |      |                                                                   |          |
| 27 |                | #15c | Impact of the project on people and systems                       | 27       |
| 28 |                |      |                                                                   |          |
| 29 |                | #15d | Reasons for any differences between observed and anticipated      | 22       |
| 30 |                |      | outcomes, including the influence of context                      |          |
| 31 |                |      |                                                                   |          |
| 32 |                |      |                                                                   |          |
| 33 |                | #15e | Costs and strategic trade-offs, including opportunity costs       | See note |
| 34 |                |      |                                                                   | 4        |
| 35 |                |      |                                                                   |          |
| 36 |                |      |                                                                   |          |
| 37 | Limitations    | #16a | Limits to the generalizability of the work                        | 28       |
| 38 |                |      |                                                                   |          |
| 39 |                | #16b | Factors that might have limited internal validity such as         | 28       |
| 40 |                |      | confounding, bias, or imprecision in the design, methods,         |          |
| 41 |                |      | measurement, or analysis                                          |          |
| 42 |                |      |                                                                   |          |
| 43 |                |      |                                                                   |          |
| 44 |                | #16c | Efforts made to minimize and adjust for limitations               | 28       |
| 45 |                |      |                                                                   |          |
| 46 |                |      |                                                                   |          |
| 47 | Conclusion     | #17a | Usefulness of the work                                            | 29       |
| 48 |                |      |                                                                   |          |
| 49 |                | #17b | Sustainability                                                    | 29       |
| 50 |                |      |                                                                   |          |
| 51 |                |      |                                                                   |          |
| 52 |                | #17c | Potential for spread to other contexts                            | 28       |
| 53 |                |      |                                                                   |          |
| 54 |                | #17d | Implications for practice and for further study in the field      | 29       |
| 55 |                |      |                                                                   |          |
| 56 |                | #17e | Suggested next steps                                              | 29       |
| 57 |                |      |                                                                   |          |
| 58 |                |      |                                                                   |          |
| 59 |                |      |                                                                   |          |
| 60 |                |      |                                                                   |          |

|   |         |     |                                                                   |    |
|---|---------|-----|-------------------------------------------------------------------|----|
| 1 | Funding | #18 | Sources of funding that supported this work. Role, if any, of the | 30 |
| 2 |         |     | funding organization in the design, implementation,               |    |
| 3 |         |     | interpretation, and reporting                                     |    |
| 4 |         |     |                                                                   |    |
| 5 |         |     |                                                                   |    |
| 6 |         |     |                                                                   |    |

## Author notes

1. 8, figure 1
2. n/a (not measured)
3. n/a (self-reported)
4. n/a (not measured)

The SQUIRE 2.0 checklist is distributed under the terms of the Creative Commons Attribution License CC BY-NC 4.0. This checklist was completed on 12. April 2019 using <https://www.goodreports.org/>, a tool made by the [EQUATOR Network](#) in collaboration with [Penelope.ai](#)

# BMJ Open

## Impact of a comprehensive prevention programme aimed at reducing incivility and verbal violence against healthcare workers in a French ophthalmic emergency department: an interrupted time-series study.

|                                 |                                                                                                                                                                                                                                                                                                                                                                                                                                                                                                                                                                                                                                                                                                                                                                                                                                                                                                                                                                                                               |
|---------------------------------|---------------------------------------------------------------------------------------------------------------------------------------------------------------------------------------------------------------------------------------------------------------------------------------------------------------------------------------------------------------------------------------------------------------------------------------------------------------------------------------------------------------------------------------------------------------------------------------------------------------------------------------------------------------------------------------------------------------------------------------------------------------------------------------------------------------------------------------------------------------------------------------------------------------------------------------------------------------------------------------------------------------|
| Journal:                        | <i>BMJ Open</i>                                                                                                                                                                                                                                                                                                                                                                                                                                                                                                                                                                                                                                                                                                                                                                                                                                                                                                                                                                                               |
| Manuscript ID                   | bmjopen-2019-031054.R2                                                                                                                                                                                                                                                                                                                                                                                                                                                                                                                                                                                                                                                                                                                                                                                                                                                                                                                                                                                        |
| Article Type:                   | Research                                                                                                                                                                                                                                                                                                                                                                                                                                                                                                                                                                                                                                                                                                                                                                                                                                                                                                                                                                                                      |
| Date Submitted by the Author:   | 01-Aug-2019                                                                                                                                                                                                                                                                                                                                                                                                                                                                                                                                                                                                                                                                                                                                                                                                                                                                                                                                                                                                   |
| Complete List of Authors:       | Touzet, Sandrine; Hospices Civils de Lyon, Pôle de Santé Publique; Université de Lyon, Laboratoire Health Services and Performance Research (HESPER) EA 7425<br>Ocelli, Pauline; Hospices Civils de Lyon, Pôle de Santé Publique; Université de Lyon, Laboratoire Health Services and Performance Research (HESPER) EA 7425<br>Denis, Angelique; Hospices Civils de Lyon, Pôle de Santé Publique<br>Cornut, Pierre-Loïc; Hospices Civils de Lyon, Hôpital Edouard Herriot, Service d'ophtalmologie<br>Fassier, Jean-Baptiste; Hospices Civils de Lyon, Pôle de Santé Publique; Université de Lyon, UMRESTTE<br>Le Pogam, Marie-Annick; University Hospital of Lausanne, Institute of Social and Preventive Medicine (IUMSP)<br>Duclos, Antoine; Hospices Civils de Lyon, Pôle de Santé Publique; Université de Lyon, Laboratoire Health Services and Performance Research (HESPER) EA 7425<br>Burillon, Carole; Hospices Civils de Lyon, Hôpital Edouard Herriot, Service d'ophtalmologie; Université de Lyon |
| <b>Primary Subject Heading</b>: | Emergency medicine                                                                                                                                                                                                                                                                                                                                                                                                                                                                                                                                                                                                                                                                                                                                                                                                                                                                                                                                                                                            |
| Secondary Subject Heading:      | Health services research                                                                                                                                                                                                                                                                                                                                                                                                                                                                                                                                                                                                                                                                                                                                                                                                                                                                                                                                                                                      |
| Keywords:                       | Health services research, Time series study, Health care workers, Violence, ACCIDENT & EMERGENCY MEDICINE                                                                                                                                                                                                                                                                                                                                                                                                                                                                                                                                                                                                                                                                                                                                                                                                                                                                                                     |
|                                 |                                                                                                                                                                                                                                                                                                                                                                                                                                                                                                                                                                                                                                                                                                                                                                                                                                                                                                                                                                                                               |

SCHOLARONE™  
Manuscripts

1  
2  
3 TITLE PAGE4  
5 **Title of the article:**6  
7  
8 Impact of a comprehensive prevention programme aimed at reducing incivility and verbal violence  
9  
10 against healthcare workers in a French ophthalmic emergency department: an interrupted time-  
11  
12 series study.  
1314  
15 **Corresponding author**16  
17 Sandrine Touzet18  
19 Hospices Civils de Lyon20  
21 Pôle de Santé Publique22  
23 162 avenue Lacassagne24  
25 69003 Lyon26  
27 France28  
29 sandrine.touzet@chu-lyon.fr30  
31 +33 472 11 51 62  
32  
3334  
35  
36 **Authors**37  
38 Sandrine Touzet\*(1, 2), sandrine.touzet@chu-lyon.fr39  
40 Pauline Occelli (1, 2), pauline.occelli@chu-lyon.fr41  
42 Angelique Denis (1), angelique.denis@chu-lyon.fr43  
44 Pierre-Loïc Cornut (3), dr.cornut@gmail.com45  
46 Jean-Baptiste Fassier (4, 5), jean-baptiste.fassier@chu-lyon.fr47  
48 Marie-Annick Le Pogam (6), marie-annick.le-pogam@chuv.ch49  
50 Antoine Duclos (1, 2), antoine.duclos@chu-lyon.fr51  
52 Carole Burillon (3, 7), carole.burillon@chu-lyon.fr53  
54 The PREVURGO Study Group.55  
56 \*Corresponding author  
57  
58  
59  
60



1  
2  
3 **The PREVURGO study group:**  
4

5 Nassira Amamra

6 Emmanuelle Aubert

7  
8  
9  
10 Sylvain Beccat

11 Daniel Betito

12 Laetitia Bouveret

13 Philippe Charrier

14 Dominique Delaunay

15 Mélanie Dufourneau

16 André Lecoanet

17 Philippe Sarnin

18 Jéromine Sicalac

19 Sylvie Sullerot

20  
21  
22  
23  
24  
25  
26  
27  
28  
29  
30  
31  
32  
33 **Institutional addresses**  
34

35  
36 1. Centre Hospitalier Universitaire de Lyon, Pôle de Santé Publique, Unité de recherche sur les  
37 services de santé, Lyon, FR.

38  
39  
40 2. Université Claude Bernard Lyon 1, Laboratoire HESPER Health Services and Performance Research  
41 EA 7425, Lyon, FR.

42  
43  
44 3. Hospices civils de Lyon, Hôpital Edouard Herriot, Service d'ophtalmologie, Lyon, FR.

45  
46  
47 4. Centre Hospitalier Universitaire de Lyon, Service de médecine et santé au travail, Lyon, FR.

48  
49  
50 5. Université Claude Bernard Lyon 1 - Domaine de Rockefeller, UMRESTTE UMR T\_9405, Unité mixte  
51 de recherche Epidémiologique et de Surveillance Transport Travail Environnement, Lyon, FR.

52  
53  
54 6. Institute of Social and Preventive Medicine (IUMSP), Lausanne University Hospital (CHUV),  
55 Lausanne, CH.

56  
57  
58 7. Université Claude Bernard Lyon 1, Villeurbanne, FR.  
59  
60

1  
2  
3  
4  
5  
6  
7  
8  
9  
10  
11  
12  
13  
14  
15  
16  
17  
18  
19  
20  
21  
22  
23  
24  
25  
26  
27  
28  
29  
30  
31  
32  
33  
34  
35  
36  
37  
38  
39  
40  
41  
42  
43  
44  
45  
46  
47  
48  
49  
50  
51  
52  
53  
54  
55  
56  
57  
58  
59  
60

**KEY WORDS**

Health services research; Time series study; Healthcare workers; Violence.

**WORD COUNT**

4598

For peer review only

## ABSTRACT

**Objective and setting:** Primary prevention, comprising patient-oriented and environmental interventions, is considered to be one of the best ways to reduce violence in the emergency department. We assessed the impact of a comprehensive prevention programme aimed at preventing incivility and verbal violence against healthcare professionals working in the ophthalmology emergency department (OED) of a university hospital.

**Intervention:** The programme was designed to address long waiting times and lack of information. It combined a computerised triage algorithm linked to a waiting room patient call system, signage to assist patients navigate in the OED, educational messages broadcast in the waiting room, presence of a mediator, and video surveillance.

**Participants:** All patients admitted to the OED and those accompanying them.

**Design:** Single-centre prospective interrupted time-series study conducted over 18 months.

**Primary outcome:** Violent acts self-reported by healthcare workers committed by patients or those accompanying them against healthcare workers.

**Secondary outcomes:** Waiting time and length of stay.

**Results:** There were a total of 22,107 admissions, including 272 (1.4%) with at least one act of violence reported by the healthcare workers. Almost all acts of violence were incivility or verbal harassment. The rate of violence significantly decreased from the pre-intervention to the intervention period (24.8; 95%CI: 20.0 to 29.5, to 9.5; 95%CI 8.0 to 10.9 acts per 1000 admissions;  $p < 0.001$ ). An immediate 53% decrease in the violence rate (Incidence rate ratio=0.47; 95%CI: 0.27 to 0.82;  $p = 0.0121$ ) was observed in the first month of the intervention period, after implementation of the triage algorithm.

**Conclusion:** A comprehensive prevention programme targeting patients and environment can reduce self-reported incivility and verbal violence against healthcare workers in an OED.

**Trial registration:** Registered at [clinicaltrials.gov](http://clinicaltrials.gov) (identifier: NCT02015884).

## ARTICLE SUMMARY

### Strengths and limitations of this study

- The comprehensive primary prevention programme integrated components that were environment and patient-oriented (organisational, educational, relational, security).
- A segmented regression analysis was conducted to detect whether the programme had a greater effect than an underlying secular trend.
- The primary outcome is self-reported acts of violence, which is subjective.
- To limit variation in self-reporting practices, the researchers met monthly with the OED team to discuss the importance of reporting each act of violence from the least (incivility, rudeness) to most severe (assault).
- The generalisation of the results is limited by the single-centre study design and by the differences between the OEDs and general emergency departments.

## MAIN TEXT

### Introduction

According to the International Labor Office, workplace violence is a frequent phenomenon.<sup>1</sup> Hospital healthcare workers are particularly vulnerable by their exposure to patients who can be agitated and distressed.<sup>2,3,4</sup> Around the world, emergency departments (ED) have been identified as an area of the healthcare sector with a high number of reported violent acts.<sup>5,6,7,8,9,10,11</sup> However, the phenomenon is underreported, especially non-physical violence (i.e. incivility, harassment, verbal violence).

Comparison of self-reported and actual documentation of hospital incidents in the US showed that 88% of the events were not documented.<sup>12</sup> Such reports are mainly informally reported to their colleagues.<sup>13</sup>

Four levels of aggressiveness, in order of severity, are distinguished by the French National Observatory of Violence in healthcare to describe violent behaviour: incivility (a lack of respect for others that manifests itself as relatively harmless acts), verbal abuse, physical threat (insults, threatening behaviour), and physically violent acts.<sup>14</sup> This violence can have repercussions on the physical and emotional health of the victims, and thus on their well-being and the quality of their work. Healthcare workers have been shown to suffer emotional symptoms similar to post-traumatic stress disorder, job dissatisfaction and early feelings of burnout, while hospitals have to bear the financial burden of decreased productivity.<sup>15,16,17,18,19</sup>

In the ED the frequency of visits observed in recent years has been accompanied by a drastic increase in waiting times,<sup>20</sup> that can lead to a high level of patient dissatisfaction and of aggression towards healthcare workers. Other factors, such as anxiety, boredom, lack of information, and lack of understanding of triage categories may also favour violent behaviour.<sup>21,22</sup>

According to the Haddon matrix adapted by Gates *et al.*, interventions to reduce violence in the ED can be categorized according to the time of intervention: before (primary prevention), during (secondary prevention), or after (tertiary prevention) an act of violence; and according to the target

1  
2  
3 of the intervention (healthcare workers, patients or accompanying visitors, and environment).<sup>23,24</sup>

4  
5 There are several solutions for the prevention of ED violence. Many interventions have concerned  
6  
7 primary prevention with interventions aiming at reducing waiting times, managing priorities  
8  
9 (implementation of a triage algorithm to manage patients according to the seriousness of the cases),  
10  
11 improving signage and patients' understanding of the care pathway.<sup>25,26</sup> Security of premises  
12  
13 (security guards, video surveillance, warning systems, *etc.*) can sometimes be implemented.<sup>7</sup> The few  
14  
15 studies that have attempted to evaluate the effectiveness of prevention interventions provide a low  
16  
17 level of evidence.<sup>24,27</sup>

18  
19 In the ophthalmology emergency department (OED) of a French university hospital the healthcare  
20  
21 workers reported the occurrence of acts of incivility and verbal violence, with both medical and  
22  
23 nursing staff demanding that this issue be addressed.<sup>28</sup> The solutions identified to deal with violence  
24  
25 included reducing waiting times, improving the premises (*i.e.* the comfort of waiting rooms,  
26  
27 confidentiality at the registration desk), changing signage, improving patient information, and  
28  
29 mediation. These components were integrated in a comprehensive primary prevention programme  
30  
31 aimed at averting violence through different components that were environment and patient-  
32  
33 oriented. The aim of this study was to evaluate the impact of this prevention programme on acts of  
34  
35 incivility and verbal violence against healthcare workers in the OED.  
36  
37  
38  
39  
40  
41  
42  
43  
44

## 45 **Methods**

### 46 ***Study design***

47  
48 The study was designed as a single-centre, prospective interrupted time series study. There were  
49  
50 three periods: a 3-month pre-interventional period (from 1 January 2014 until 30 March 2014), a 3-  
51  
52 month training period (from 31 March 2014 until 9 July 2014), and a 12-month implementation  
53  
54 period of the prevention programme (from 10 July 2014 until 30 June 2015); the protocol has been  
55  
56 previously published.<sup>29</sup>  
57  
58  
59  
60

1  
2  
3 *Deviations from the published protocol:*<sup>29</sup> the planned study design was a “on – off” study over 24  
4  
5 months (including a 2-month pre-interventional period and a 22-month intervention period, without  
6  
7 a training period). The first 6 months of the study were not taken into account owing to strong  
8  
9 underreporting of violent acts by the healthcare workers, as ascertained during study coordination  
10  
11 meetings. To meet the study schedule, we reduced the duration of the study to 18 months and we  
12  
13 modified the study design. We chose to abandon the “on – off” design because of time constraints  
14  
15 and the low acceptability of the “off” period when the intervention was to be removed.  
16  
17

### 18 19 ***Patient and Public Involvement***

20  
21 Patients or the public were not involved in this work.  
22  
23

### 24 25 ***Setting***

26  
27 This study took place at an adult OED of a university hospital located in an urban environment, in the  
28  
29 Rhône-Alpes region of France. The OED is open 24 hours a day, 7 days a week, and handles all types  
30  
31 of medical and surgical ophthalmological emergencies. In 2014, the department treated 20 309  
32  
33 patients with an average of 68 admissions per day.  
34  
35

### 36 37 ***Participants***

#### 38 39 *Patients and those accompanying them*

40  
41 All patients (adults and children) registering at the OED from 1 January 2014 to 30 June 2015 were  
42  
43 included. Those accompanying the patient (family, friends, etc.) were also included. Patients  
44  
45 registering during weekends and public holidays were excluded owing to the organisational  
46  
47 characteristics of these periods (*i.e.* different and fewer staff as compared to weekdays), as were  
48  
49 those registering during the 3-month training period from 31 March 2014 to 9 July 2014.  
50  
51

#### 52 53 *Healthcare workers*

54  
55 The OED team (seven nurses, six ward aides, two orthoptic students, seven residents in  
56  
57 ophthalmology, four senior ophthalmologists) operating on a rotating schedule to provide care 24/7  
58  
59 were included in the study. The OED team present during a week day is composed of four nurses,  
60

1  
2  
3 four ward aides, two orthoptic students, one or two residents in ophthalmology, and one on-call  
4  
5 senior ophthalmologist; this did not change over the study period. Four admitting clerks were also  
6  
7 included.  
8  
9

### 10 ***Prevention programme***

#### 11 *Programme elaboration*

12  
13 The OED team partnered with researchers to develop the comprehensive prevention programme.

14  
15 The programme had five complementary components, identified through a literature review, that  
16  
17 were added progressively:  
18  
19

20  
21 - An organisational component (A), beginning 30 March 2014, with the use by reception nurses of a  
22  
23 computerised triage algorithm. This algorithm made it possible to prioritise patients as soon as they  
24  
25 arrived in the unit and to carry out initial examinations (such as dilatation of the pupils by the  
26  
27 orthoptist) according to the patient's reason for presentation to the OED. It was linked to a waiting  
28  
29 room patient call system. A 3-month phase of training to use of the algorithm was conducted for  
30  
31 reception nurses (named "training period"). This training period was not planned in the published  
32  
33 protocol.<sup>29</sup>  
34  
35

36  
37 - An environmental component (B) and educational component (C), beginning 6 October 2014, were  
38  
39 combined. The environmental component was signage to help patients navigate within the OED. The  
40  
41 educational component was messages about the OED team and its activity, the care pathway, the  
42  
43 patients' order of passage according to severity, and information on the waiting time that were  
44  
45 broadcast on a TV in the waiting rooms to patients. As both components addressed difficulties for  
46  
47 the patients to understand the functioning of the OED, we considered it appropriate to combine  
48  
49 them. This is a deviation from the initial protocol.<sup>29</sup>  
50  
51

52  
53 - A relational component (D), beginning 5 January 2015, with the presence of a mediator in the OED,  
54  
55 for preventive mediation actions. The mediator held a Master's degree in mediation, and was  
56  
57 recruited as part of the project. The mediator was to intervene when patients showed signs of  
58  
59  
60



1  
2  
3 impatience or nervousness and in case of conflict involving a patient or visitor. The mediator  
4 circulated through corridors and waiting rooms, and was available to patients and visitors.  
5

6  
7 - A security component (E), beginning 6 April 2015, with the implementation of video surveillance  
8 cameras throughout the OED (admissions desk, corridors) connected to the hospital security control  
9 room.  
10  
11

### 12 *Programme implementation*

13  
14 The prevention programme was implemented in four steps, each corresponding to a period of three  
15 months, after a 3-month training period for the computerized triage algorithm (Figure 1). The study  
16 project manager conducted monthly visits to the OED during the intervention period to ensure  
17 programme implementation.  
18  
19  
20  
21  
22  
23  
24  
25

### 26 **Outcomes**

27  
28 *The primary outcome* was violence committed by patients or those accompanying them against  
29 healthcare workers or against other patients and those accompanying them among all admissions to  
30 the OED.  
31  
32  
33

34  
35 Violence was reported in medical records by healthcare workers. They could report incidents directly  
36 committed against them or against patients and those accompanying them. Violence was described  
37 using a classification that distinguishes four levels, from least (incivility) to most severe (assault),  
38 based on the French National Observatory of Violence in healthcare (Table 1).<sup>29</sup> Clinical cases were  
39 used monthly to train professionals to identify the different types of acts of violence to be reported  
40 and their level of severity (see Table 1 for examples). They were developed from situations  
41 experienced by OED professionals. These situations were identified during interviews with OED  
42 professionals conducted by the researchers prior to the initiation of the study.<sup>28</sup> The aim was to  
43 reduce the variability in the classification of events.  
44  
45  
46  
47  
48  
49  
50  
51  
52  
53  
54

55 The project manager also met monthly with the OED team to discuss the importance of reporting  
56 events to limit under-reporting of acts of violence.  
57  
58  
59  
60

1  
2  
3 *Secondary outcomes* were waiting time (defined as the interval of time between the administrative  
4 registration of the patient and the assessment by a nurse or an ophthalmologist) and length of stay  
5  
6 (defined as the interval of time between registration and discharge). This information was routinely  
7  
8 collected at the OED for all inpatients.  
9  
10  
11  
12  
13  
14  
15  
16  
17  
18  
19  
20  
21  
22  
23  
24  
25  
26  
27  
28  
29  
30  
31  
32  
33  
34  
35  
36  
37  
38  
39  
40  
41  
42  
43  
44  
45  
46  
47  
48  
49  
50  
51  
52  
53  
54  
55  
56  
57  
58  
59  
60

For peer review only

**Table 1. Four levels of violence, from least to most severe according to the National Observatory of Violence in Hospitals and examples of clinical cases used to train healthcare workers.**

|                                |                                                                                                                                                                                                                                                                                                                                                                                                                                                                                      |
|--------------------------------|--------------------------------------------------------------------------------------------------------------------------------------------------------------------------------------------------------------------------------------------------------------------------------------------------------------------------------------------------------------------------------------------------------------------------------------------------------------------------------------|
| Level 1<br>(incivility)        | <p>Insistent questions, incivility, rudeness, occupation of the corridor, spitting, making noise (telephone, etc.)</p> <p>Examples:</p> <ul style="list-style-type: none"> <li>- A patient (or an accompanying person) opens the door of the nursing office without knocking, or waiting for an answer, and calls you for some reason.</li> <li>- A patient (or an accompanying person) considering that everyone comes before him comes to show his/her dissatisfaction.</li> </ul> |
| Level 2<br>(verbal harassment) | <p>Insult or verbal abuse without threat</p> <p>Examples:</p> <ul style="list-style-type: none"> <li>- A patient (or an accompanying person), dissatisfied with your answer, calls you an arsehole.</li> <li>- A patient (or an accompanying person), tired of waiting, calls you a loser or incapable.</li> </ul>                                                                                                                                                                   |
| Level 3<br>(threats)           | <p>Verbal or physical threat.</p> <p>Examples:</p> <ul style="list-style-type: none"> <li>- A patient (or an accompanying person) raises his/her hand on you.</li> <li>- A patient (or an accompanying person) comes dangerously close to you to scream on you.</li> </ul>                                                                                                                                                                                                           |
| Level 4                        | <p>Intentional violence, assault, vandalism or damage to equipment.</p>                                                                                                                                                                                                                                                                                                                                                                                                              |

1  
2  
3 (assaults)

Examples:

4  
5 - An angry patient (or an accompanying person) pushes you.

6  
7 - A patient (or an accompanying person) spits on you.  
8

9  
10 

---

Legend. Examples come from clinical cases used to train the healthcare workers to notify the level any incivility or violence they may be subject.  
11

12  
13  
14  
15  
16  
17  
18  
19  
20  
21  
22  
23  
24  
25  
26  
27  
28  
29  
30  
31  
32  
33  
34  
35  
36  
37  
38  
39  
40  
41  
42  
43  
44  
45  
46

For peer review only

### **Blinding**

Healthcare workers and patients were not blinded to the intervention phase. However, in the absence of individual information on the study (this was not required by the Institutional Review Board), it appears unlikely that patient behaviour was influenced by the study.

### **Sample size**

In the initial protocol, the sample size was determined for an on – off design by the expected efficacy of each of the five components of the prevention programme. The statistical unit was the patient admitted to the OED. Based on the initial hypotheses, the total sample size required was 30 224 admissions with a risk alpha of 5% and the statistical power of 80%. We did not recalculate the number of subjects required; there is usually no estimation of the sample size in interrupted time-series studies.<sup>30,31</sup>

### **Statistical methods**

The analyses were conducted on data obtained during the 15-month study period (that corresponded to the pre-intervention and intervention periods, and without consideration of the training period). The proportion of admissions with violence committed by patients, or those accompanying them, was expressed as a rate per 1000 admissions. When the perpetrator was someone accompanying the patient, the violence was attributed to the patient.

For all outcomes, we conducted a pre -post analysis to compare rates before and during implementation of the prevention programme using the Chi square test. In addition, for the primary outcome we performed a segmented regression analysis to account for the possibility of concurrent secular trends in violence that could influence the results. We evaluated the effect of the programme on violence at both the aggregate and individual patient levels.

First, a segmented Poisson regression model offset by the total number of admissions at OED per month was used to compare monthly violence rates between pre and intervention periods. The

1  
2  
3 model included intercept, time trend before implementation, change in level immediately after the  
4  
5 training period, and change in time trend after the training period.  
6

7 Analyses were stratified to allow for differential effects by age group, gender, waiting time, and  
8  
9 length of stay. Results were reported as incidence rate ratio (IRR) and 95% confidence intervals (CIs).  
10  
11 Secondly, logistic regression was used to assess change in level and trend of odds of violence  
12  
13 occurrence within admission at OED before and after each intervention after adjusting for individual  
14  
15 characteristics (age, gender, waiting time >2h, admission to OED during public holidays, night  
16  
17 admission, patients with several admissions to OED). A model with generalised equation estimation  
18  
19 with a 1<sup>st</sup> order autoregressive correlation structure was fitted to account for the clustering of  
20  
21 admissions to the OED within a calendar day. Results were reported as odds ratio (OR) and 95% CIs.  
22  
23 All admissions to the OED were treated independently. All p values were 2-sided and statistical  
24  
25 significance level was set at alpha=0.05. Statistical analyses were performed with SAS version 9.4  
26  
27 software (SAS Institute Inc., Cary, NC, USA).  
28  
29  
30  
31

### 32 ***Ethics approval***

33  
34 Approval from the Sud Est IV Institutional Review Board was obtained in September 2011 (L11-117).  
35  
36 Under French law in effect at the time of the study, consent was not required for the type of study  
37  
38 and intervention being evaluated.  
39  
40  
41

### 42 ***Reporting criteria***

43  
44 We followed the SQUIRE criteria from the EQUATOR network to report the study.<sup>32</sup>  
45  
46  
47  
48  
49  
50

## 51 **Results**

### 52 ***Participants***

53  
54 Over the 15-month study period, 22 107 admissions (corresponding to 18 826 patients) were  
55  
56 analysed (Figure 1). Among the 18 826 patients, 12% were admitted more than once. The mean  $\pm$   
57  
58  
59  
60

1  
2  
3 standard deviation (SD) number of visits per patient was  $1.2 \pm 0.6$  (range: 1-15), there was a mean 70  
4  
5  $\pm 12$  admissions per day over the 315-day study period (range: 33-105).  
6  
7

### 8 ***Characteristics of admissions***

9

10  
11 Characteristics of admissions according to the components implemented are presented in Table 2.  
12  
13  
14  
15  
16  
17  
18  
19  
20  
21  
22  
23  
24  
25  
26  
27  
28  
29  
30  
31  
32  
33  
34  
35  
36  
37  
38  
39  
40  
41  
42  
43  
44  
45  
46  
47  
48  
49  
50  
51  
52  
53  
54  
55  
56  
57  
58  
59  
60

For peer review only

**Table 2. Characteristics of admissions, waiting time and length of stay.**

|                                        | Pre-intervention<br>period<br>N=4 118 | Intervention period |                 |                  |                   |
|----------------------------------------|---------------------------------------|---------------------|-----------------|------------------|-------------------|
|                                        |                                       | A<br>N=4 403        | A+BC<br>N=4 587 | ABC+D<br>N=4 454 | ABCD+E<br>N=4 545 |
| Male, n (%)                            | 2 250 (54.6)                          | 2 335 (53.0)        | 2 499 (54.5)    | 2 426 (54.5)     | 2 564 (56.4)      |
| Age ≥ 40 years, n (%)                  | 2 159 (52.4)                          | 2 547 (57.8)        | 2 452 (53.5)    | 2 368 (53.2)     | 2 459 (54.1)      |
| Coming during the day, n (%)           | 2 944 (71.5)                          | 3 164 (71.9)        | 3 536 (77.1)    | 3 519 (79.0)     | 3 324 (73.1)      |
| Waiting time > 2h <sup>a</sup> , n (%) | 2 755 (66.9)                          | 2 754 (62.5)        | 2 377 (51.8)    | 2 100 (47.1)     | 2 125 (46.8)      |
| Length of stay > 3h, n (%)             | 2 045 (49.7)                          | 2 481 (56.3)        | 2 002 (43.6)    | 1 601 (35.9)     | 1 595 (35.1)      |

Legend: Coming during the day corresponded to admission between 8 am and 7.59 pm; waiting time was defined as the interval between time of registration of patient's arrival and first time of assessment by a nurse or an ophthalmologist; Length of stay was defined as the interval between registration and discharge. Components: A corresponds to computerised triage algorithm, BC corresponds to signage and message broadcast, D corresponds to mediator, and E corresponds to video surveillance.

<sup>a</sup> waiting time was not documented for 108 admissions.



### **Outcomes**

A total of 376 acts of violence, corresponding to 272 admissions (1.4% of 22 107 admissions), were recorded during the total study period (Table 3). Among the 272 admissions concerned, 74% (n=202) had led to one act of violence, 16% (n=45) had led to two acts, and 10% (n=25) had led to three or more acts. In the pre-intervention period, 98.6% acts of violence were incivility or verbal harassment and 1.4% were threats. In the intervention period, all acts of violence were incivility or verbal harassment.

For peer review only

**Table 3. Characteristics of acts of violence reported by healthcare workers.**

|                                                      | Pre-intervention<br>period<br>N=4 118 | Intervention period after a 3-month training |                 |                  |                   |
|------------------------------------------------------|---------------------------------------|----------------------------------------------|-----------------|------------------|-------------------|
|                                                      |                                       | A<br>N=4 403                                 | A+BC<br>N=4 587 | ABC+D<br>N=4 454 | ABCD+E<br>N=4 545 |
| Rate of act of violence per 1000 admissions (95%CI)* | 24.8 (20.0-29.5)                      | 10.0 (7.1-12.9)                              | 8.9 (6.2-11.7)  | 8.1 (5.5-10.7)   | 10.8 (7.8-13.8)   |
| Act of violence**, n                                 | 143                                   | 54                                           | 51              | 56               | 72                |
| Level of violence, n (%)                             |                                       |                                              |                 |                  |                   |
| Level 1 (incivility)                                 | 131 (91.6)                            | 46 (85.2)                                    | 45 (88.2)       | 43 (76.8)        | 65 (90.3)         |
| Level 2 (verbal harassment)                          | 10 (7.0)                              | 7 (13.0)                                     | 5 (9.8)         | 13 (23.2)        | 7 (9.7)           |
| Level 3 (threats)                                    | 2 (1.4)                               | 1 (1.9)                                      | 1 (2.0)         | 0 (0)            | 0 (0)             |
| Level 4 (assaults)                                   | 0 (0)                                 | 0 (0)                                        | 0 (0)           | 0 (0)            | 0 (0)             |
| Committed by patient, n (%)                          | 98 (68.5)                             | 43 (79.6)                                    | 35 (68.6)       | 38 (67.9)        | 53 (73.6)         |
| Healthcare worker as the victim***, n (%)            | 140 (97.9)                            | 51 (94.4)                                    | 48 (94.1)       | 54 (96.4)        | 72 (100)          |

\* Rate of acts of violence was defined as the percentage of admissions per period with at least one act of violence reported.

1  
2  
3 \*\* Several acts of violence could occur per admission.  
4

5 \*\*\* 6 acts of violence were committed between patients, and the victim was not documented for 5 acts of violence.  
6

7  
8 Components: A corresponds to computerised triage algorithm, BC corresponds to signage and message broadcast, D corresponded to mediator, and E  
9  
10 corresponds to video surveillance.

11  
12 Abbreviation: CI: Confidence Interval.  
13  
14  
15  
16  
17  
18  
19  
20  
21  
22  
23  
24  
25  
26  
27  
28  
29  
30  
31  
32  
33  
34  
35  
36  
37  
38  
39  
40  
41  
42  
43  
44  
45  
46

For peer review only

### *Primary outcome*

The rate of violence significantly decreased from 24.8 (95%CI: 20.0 to 29.5) admissions with violence per 1000 admissions in the pre-intervention period to 9.5 (95%CI: 8.0 to 10.9) acts of violence per 1000 admissions in the intervention period ( $p<0.001$ ). The effects of the components on monthly violence rates are presented in Figure 2.

### *Secondary outcomes*

The frequency of admissions with waiting times  $\geq 2$  hours decreased from 67% ( $n=2755$  admissions) to 52% ( $n=9356$ ) between the pre-intervention period and the intervention period ( $p<10^{-3}$ ). For the length of stay, frequency of admissions with a stay  $\geq 3$  hours decreased from 50% ( $n=2045$ ) to 43% ( $n=7679$ ;  $p<10^{-3}$ ).

### *Segmented regression analysis*

According to the Poisson regression analyses, no pre-intervention trend was found in monthly violence rates (IRR=1.13, 95%CI: 0.87 to 1.46,  $p=0.3243$ ). After accounting for underlying trends, an immediate 53% decrease (IRR=0.47, 95%CI: 0.27 to 0.82,  $p=0.0121$ ) was observed in the violence rate of the first month following the training period. No monthly trend effects in overall intervention period was detected (IRR=0.97, 95%CI: 0.92 to 1.02,  $p=0.1660$ ). Poisson regression results stratified by admission's characteristics are presented in Table 4. Following the training period, a similar immediate decrease was found for female (IRR=0.35, 95%CI: 0.15 to 0.83,  $p=0.0212$ ), age  $<40$  years (IRR=0.43, 95%CI: 0.19 to 0.99,  $p=0.0471$ ), waiting time  $>2$  hours (IRR=0.49, 95%CI: 0.26 to 0.92,  $p=0.0306$ ), and length of stay  $>3$  hours (IRR=0.38, 95%CI: 0.20 to 0.74,  $p=0.0089$ ). No monthly trend effect in the intervention period was observed for all subgroups.

**Table 4. Multivariate analysis\* of the comprehensive prevention programme on violence rates by admissions characteristics.**

| Characteristics | Pre-intervention trend<br>(per month)** |         | Change in level*** |         | Change in trend<br>(per month)**** |         |
|-----------------|-----------------------------------------|---------|--------------------|---------|------------------------------------|---------|
|                 | IRR [95%CI]                             | p-value | IRR [95%CI]        | p-value | IRR [95%CI]                        | p-value |
| Sex             |                                         |         |                    |         |                                    |         |
| Male            | 1.05 [0.76;1.46]                        | 0.7500  | 0.59 [0.28;1.20]   | 0.1308  | 0.95 [0.89;1.01]                   | 0.0810  |
| Female          | 1.27 [0.84;1.93]                        | 0.2343  | 0.35 [0.15;0.83]   | 0.0212  | 1.00 [0.93;1.07]                   | 0.9548  |
| Age             |                                         |         |                    |         |                                    |         |
| <40 yrs         | 1.11 [0.78;1.58]                        | 0.5292  | 0.43 [0.19;0.99]   | 0.0471  | 0.96 [0.90;1.04]                   | 0.2771  |
| ≥ 40 yrs        | 1.16 [0.79;1.69]                        | 0.4107  | 0.51 [0.24;1.08]   | 0.0730  | 0.97 [0.92;1.04]                   | 0.3601  |
| Waiting time    |                                         |         |                    |         |                                    |         |
| ≤2h             | 1.11 [0.67;1.85]                        | 0.6468  | 0.39 [0.13;1.18]   | 0.0892  | 0.96 [0.88;1.05]                   | 0.3427  |
| >2h             | 1.12 [0.83;1.51]                        | 0.4233  | 0.49 [0.26;0.92]   | 0.0306  | 0.99 [0.94;1.04]                   | 0.6704  |
| Length of stay  |                                         |         |                    |         |                                    |         |
| ≤3h             | 1.03 [0.66;1.62]                        | 0.8738  | 0.57 [0.22;1.51]   | 0.2329  | 0.96 [0.89;1.04]                   | 0.2823  |
| >3h             | 1.13 [0.82;1.55]                        | 0.4231  | 0.38 [0.20;0.74]   | 0.0089  | 1.00 [0.94;1.06]                   | 0.9764  |

Abbreviations: IRR: Incidence rate ratio, CI: Confidence interval.

1  
2  
3 \* segmented Poisson regression offset by the total number of admissions at OED per month. RR <1 represents a decline and conversely

4  
5 RR >1 represents an increase in monthly violence rate.

6  
7 \*\* rate of change in monthly violence rate prior to the intervention (*i.e.* time effect).

8  
9 \*\*\* immediate change in the mean monthly violence rate from pre-intervention to intervention period.

10  
11 \*\*\*\* change in slope per month following to the intervention period.  
12  
13  
14  
15  
16  
17  
18  
19  
20  
21  
22  
23  
24  
25  
26  
27  
28  
29  
30  
31  
32  
33  
34  
35  
36  
37  
38  
39  
40  
41  
42  
43  
44  
45  
46

### *Piecewise logistic regression analysis*

Piecewise logistic regression analysis confirmed the absence of pre-intervention trend (see Table 5).

Following the training period, three components of the programme had significant effects on the underlying trend of violence occurrence. There was a significant decline in the odds of violence occurrence over time after the implementation of component A-Algorithm (adjusted odds ratio [aOR]= 0.87, 95%CI: 0.82-0.91,  $p<10^{-3}$ ). The trend toward decreasing occurrence of violence over time significantly reversed in the 3 months following the implementation of component D-Mediators (aOR= 1.45, 95%CI: 1.14-1.84,  $p=0.002$ ) indicating a significant increase over time after the implementation of a mediator. The trend significantly reversed following component E- video surveillance (aOR= 0.65, 95%CI: 0.45-0.93,  $p=0.019$ ) suggesting that the magnitude of increase in occurrence of violence decreased over time and returned at its previous level (aOR= 0.84, 95%CI: 0.66-1.07,  $p=0.152$ ). No effect was observed for the component BC combining signage and messages broadcast on TV in the waiting rooms.

**Table 5. Piecewise logistic regression analysis of the comprehensive prevention programme effects\* on violence.**

|                                         | Full model**        |         | Simple model***    |         |
|-----------------------------------------|---------------------|---------|--------------------|---------|
|                                         | OR [95%CI]          | p-value | OR [95%CI]         | p-value |
| Trend prior to intervention (per month) | 1.09 [0.81 ; 1.49]  | 0.5848  | --                 | --      |
| Immediate change in level:              |                     |         |                    |         |
| A                                       | 0.31 [0.03 ; 3.20]  | 0.3236  | --                 | --      |
| BC added to A                           | 2.19 [0.70 ; 6.82]  | 0.1773  | --                 | --      |
| D added to ABC                          | 1.05 [0.28 ; 3.88]  | 0.9406  | --                 | --      |
| E added to ABCD                         | 5.73 [2.08 ; 15.77] | 0.0007  | --                 | --      |
| Change in trend (per month):            |                     |         |                    |         |
| A                                       | 0.95 [0.55 ; 1.65]  | 0.8657  | 0.87 [0.82 ; 0.92] | <.0001  |
| BC added to A                           | 0.61 [0.33 ; 1.13]  | 0.1188  | --                 | --      |
| D added to ABC                          | 1.85 [0.98 ; 3.48]  | 0.0572  | 1.45 [1.14 ; 1.84] | 0.0022  |
| E added to ABCD                         | 0.35 [0.17 ; 0.70]  | 0.0031  | 0.65 [0.45 ; 0.93] | 0.0194  |

Abbreviations: OR: odds ratio, CI: Confidence interval.

Components: A corresponds to computerised triage algorithm, BC corresponds to signage and messages broadcast on TV in the waiting rooms, D corresponds to mediator, and E corresponds to video surveillance.



1  
2  
3 \*logistic generalised estimating equation model adjusted for waiting time > 2h. OR <1 represent a decline and inversely OR>1 represent an increase in  
4  
5 monthly likelihood of violence occurrence during admission at OED per month.  
6

7  
8 \*\*full model included time effect and immediate changes after each component's implementation and changes in slopes.  
9

10 \*\*\*parsimonious model after backward selection.  
11  
12  
13  
14  
15  
16  
17  
18  
19  
20  
21  
22  
23  
24  
25  
26  
27  
28  
29  
30  
31  
32  
33  
34  
35  
36  
37  
38  
39  
40  
41  
42  
43  
44  
45  
46

For peer review only

## Discussion

The present study found a significant reduction in self-reported incivility or verbal violence by healthcare workers following the implementation of a comprehensive prevention programme. This reduction occurred after the implementation of the first component of the programme, a triage algorithm, and was maintained over time while other components were successively implemented. The violence rate during the pre-intervention period found in the present study (24.8 per 1000 admissions) was higher than that previously reported. In a recent meta-analysis of 22 studies the authors found a pooled incidence of 36 per 10,000 admissions (range: 1 to 172 per 10,000 admissions).<sup>33</sup> It is, however, difficult to compare the results of the present study with those reported elsewhere due to heterogeneity in the way violence is defined, collected, and reported in the literature; for a majority of studies, data collection was conducted retrospectively, using security records and incident report documents that mainly report severe acts of violence.<sup>33</sup> Previous studies reported a low rate of acts of violence with a high level of severity (threats and assaults).<sup>34,35</sup> In the present study, the frequency of such acts were even lower; only four acts of verbal or physical threat and no assault. This can be explained by the context of the OED that did not admit patients for drug/alcohol abuse or psychiatric disease which are predictors of physical violence perpetrated by patients against healthcare workers.<sup>35</sup> However, as in other studies, verbal harassment or incivility committed by patients were the most frequent form of violence experienced herein despite differences in methodology.<sup>36,37,38</sup> Concomitantly, waiting times and length of stay of patients in the OED were significantly reduced. The reduction of waiting times was an expected effect of the triage algorithm, which allowed, according to the reason for consultation, for orthoptists to perform examinations such as dilating pupils without having to consult a physician. Associated with a patient call system in the waiting room, the triage algorithm was a mean streamline the order of passage and waiting time and thus reduce the stressful condition in waiting rooms.<sup>35</sup> It was not

1  
2  
3 related to a change in the number of professionals (which remained stable throughout the study) nor  
4  
5 to a change in the number of admissions to OED.  
6

7 As recommended, the prevention programme combined different components, targeting regularly  
8  
9 cited causes of violence.<sup>24</sup> The intervention targeted patients/visitors and the environment, but did  
10  
11 not target how OED professionals handle violent situations.<sup>38,39,40</sup> Behaviour of healthcare  
12  
13 professionals such as empathic communication, early proactive interaction, and verbal and body  
14  
15 language expressing respect and confidence are associated with a reduction in incivility and verbal  
16  
17 abuse or aggressive behaviour.<sup>28,35,41</sup>  
18

19  
20 Caution should, however, be taken when interpreting the results of the present study. It is not  
21  
22 possible to distinguish the relative effect of the tested components. For instance, a positive effect  
23  
24 was observed during the implementation of the first component (triage algorithm linked to a waiting  
25  
26 room patient call system). It is not possible to conclude whether this effect was due to the algorithm  
27  
28 or to the fact that it was implemented first. Another point to consider is that violence increased  
29  
30 despite the presence of the mediator. To the best of our knowledge, there was no change in the  
31  
32 conditions of patient reception (*i.e.* no increase in waiting times or in admission frequency and no  
33  
34 change in the OED team) during the implementation of the mediator that could explain this  
35  
36 unintended effect. The mediator, by his/her presence, may have stimulated the declaration of  
37  
38 violence by healthcare workers. It highlights the difficulty to collect non-physical acts of violence that  
39  
40 are underreported by healthcare staff. The main reasons of this are that it is prevalent yet rarely  
41  
42 results in physical injury, most of professionals consider it as part of their jobs, these acts of violence  
43  
44 are subject to personal interpretation, and the use of existing reporting systems is time-consuming  
45  
46 and perceived as unnecessary because it does not lead to any action to reduce such  
47  
48 behaviour.<sup>24,28,41,42,43</sup> To limit variation in reporting practices, the researchers met monthly with the  
49  
50 OED team to discuss the importance of reporting events from least (incivility) to most severe  
51  
52 (assault). Moreover reporting was facilitated by its integration in the patient records.  
53  
54  
55  
56  
57  
58  
59  
60

1  
2  
3 Moreover, we conducted a segmented regression analysis to detect if the programme had a greater  
4 effect than an underlying secular trend.<sup>30,31,44,45,46</sup> The analysis is limited by the short pre-intervention  
5 phase, which does not allow a solid estimation of the trend before the programme implementation.  
6  
7

8  
9  
10 Second, a longer post-intervention follow-up could have been useful to verify the effectiveness of the  
11 program at a distance of time from its implementation.<sup>47</sup> A longer observation period could have  
12 helped to explain whether the increase in the reports after the implementation of the mediator was  
13 a real phenomenon (increase of the violence) or not (greater attention to violence). A qualitative  
14 approach would have also helped us to better understand the mechanisms of action of the  
15 programme components,<sup>48</sup> in particular the paradoxical effect of the mediator. It would have allowed  
16 us to evaluate whether the coping of the healthcare workers with the violence has improved. Finally,  
17 the generalisation of the results is limited by the single-centre study design and by the differences  
18 between the OEDs and general emergencies. In particular, there are no admissions for psychiatric or  
19 drug abuse and alcohol problems, which are known to be sources of violence.<sup>33,35</sup>  
20  
21  
22  
23  
24  
25  
26  
27  
28  
29  
30  
31

32 In conclusion, a comprehensive prevention programme targeting patients, visitors and environment  
33 can reduce self-reported incivility and verbal violence by healthcare workers in an OED over 12  
34 months. EDs should develop comprehensive primary prevention programme that integrate various  
35 environmental and patient-oriented components (organisational, educational, relational, security).  
36  
37  
38  
39  
40  
41  
42  
43  
44  
45  
46  
47  
48  
49  
50  
51  
52  
53  
54  
55  
56  
57  
58  
59  
60

### **Author contributions**

The study was conceptualized and designed by ST, PLC, MALP, and ADu.

PLC and CB are the Co-Chief Investigators, provided leadership for the project.

ST, PLC, JBF, and ADu contributed to the development of the programme.

ST, PO, and ADe planned the statistical analysis.

ADe carried out the statistical analyses.

ST, PO, and ADe drafted the manuscript.

All authors reviewed the draft version, made suggestions, and approved the final version.

### **Funding**

This study was supported by a grant from the Programme de Recherche en Qualité Hospitalière 2011 (PRQH 2011- D50794) of the French ministry of health (Ministère chargé de la Santé, Direction de l'Hospitalisation et de l'Organisation des Soins). The funder had no role in study design, data collection, data analysis, decision to publish, or writing of the manuscript.

### **Acknowledgments**

We thank the OED team. We also acknowledge the hard work and the active support of Sylvie Sullerot, advance practice nurse of the OED, Daniel Betito, computer scientist, for the implementation of the algorithm in the hospital information system, Hélène Janin-Magnificat, physician, for her support of the study and the students of the communication school of Lyon for the creation of the messages broadcast on TV in the waiting rooms.

The authors are grateful to Philip Robinson for help in manuscript preparation.

### **Competing Interests**

None declared.

### **Patient consent**

Not required.

### **Data statement**

The data set is not available as ethics approval does not allow release.

## Figures

### Figure 1. Study flow chart of admissions at Ophthalmology Emergency Department.

Legend: Components: A: computerised triage algorithm, BC: signage and messages broadcast on TV in the waiting rooms, D: mediator, E: video surveillance.

### Figure 2. Observed time series of the A) rates of admission at OED with acts of violence, B) total number of admissions at OED and C) rates of admissions with waiting time greater than 2 hours by month before and during implementation of the prevention programme.

Abbreviation: OED: Ophthalmology Emergency Department

Legend: The grey band represents the 3-month training period. The dotted lines inside the scatter plots represents the implementation of component A (computerised triage algorithm), component BC (signage and messages broadcast on TV in the waiting rooms), component D (mediator) and component E (video surveillance).

## References

---

- 1 Bureau of Labor Statistics. News release: Nonfatal occupational injuries and illnesses requiring days away from work. United State Department of Labor (USDL 15-2205). Last Modified Date: November 10, 2016. Retrieved from <http://www.bls.gov/news.release/pdf/osh2.pdf>. Accessed May 26, 2018.
- 2 Kuehn BM. Violence in health care settings on rise. *JAMA* 2010;304:511–2.
- 3 Magnavita N, Heponiemi T. Violence towards health care workers in a Public Health Care Facility in Italy: a repeated cross-sectional study. *BMC Health Services Res* 2012;12:108.
- 4 Arnetz JE, Aranyos D, Ager J, et al. Development and application of a population-based system for workplace violence surveillance in hospitals. *Am J Ind Med* 2011;54:925–34.
- 5 Lau JB, Magarey J, McCutcheon H. Violence in the emergency department: a literature review. *Aust Emerg Nurs J* 2004;7:27–37.
- 6 Gates DM, Ross CS, McQueen L. Violence against emergency department workers. *J Emerg Med* 2006;31:331–7.
- 7 Kowalenko T, Cunningham R, Sachs CJ, et al. Workplace violence in emergency medicine: current knowledge and future directions. *J Emerg Med* 2012;43:523–31.
- 8 Winstanley S, Whittington R. Aggression towards health care staff in a UK general hospital: variation among professions and departments. *J Clin Nurs* 2004;13:3-10.
- 9 Ryan D, Maguire J: Aggression and violence - a problem in Irish Accident and Emergency departments? *J Nurs Manag* 2006, 14:106-15.
- 10 Crilly J, Chaboyer W, Creedy D: Violence towards emergency department nurses by patients. *Accid Emerg Nurs* 2003, 12:67–73.
- 11 Behnam M, Tillotson RD, Davis SM, et al. Violence in the emergency department: a national survey of emergency medicine residences and attending physicians. *J Emerg Med* 2011;40:565–79.
- 12 Arnetz JE, Hamblin L, Ager J, Luborsky M, Upfal MJ, Russell J, Essenmacher L. Underreporting of Workplace Violence: Comparison of Self-Report and Actual Documentation of Hospital Incidents.

1  
2  
3  
4  
5 *Workplace Health Saf* 2015;63:200-10.

6  
7 <sup>13</sup> Ramacciati N, Gili A, Mezzetti A, et al. Violence towards Emergency Nurses: The 2016 Italian  
8 National Survey-A cross-sectional study. *J Nurs Manag* 2019;27:792-805.

9  
10  
11 <sup>14</sup> Observatoire National des Violences en milieu de Santé. La prévention des atteintes aux personnes  
12 et aux biens en milieu de santé. Guide méthodologique. Ed. Direction Générale de l'Offre de Soins.  
13  
14  
15  
16  
17  
18  
19  
20  
21  
22  
23  
24  
25  
26  
27  
28  
29  
30  
31  
32  
33  
34  
35  
36  
37  
38  
39  
40  
41  
42  
43  
44  
45  
46  
47  
48  
49  
50  
51  
52  
53  
54  
55  
56  
57  
58  
59  
60

Avril 2017. 108 p. Available at: [http://solidarites-sante.gouv.fr/IMG/pdf/guide\\_onvs\\_-\\_prevention\\_atteintes\\_aux\\_personnes\\_et\\_aux\\_biens\\_2017-04-27.pdf](http://solidarites-sante.gouv.fr/IMG/pdf/guide_onvs_-_prevention_atteintes_aux_personnes_et_aux_biens_2017-04-27.pdf). Accessed May 26, 2018.

<sup>15</sup> Lyneham J. Violence in New South Wales emergency departments. *Aust J Adv Nurs* 2000;18:8-17.

<sup>16</sup> Needham I, Abderhalden C, Halfens RJG, et al. Non-somatic effects of patient aggression on nurses:  
a systematic review. *J Adv Nurs* 2005;49:283-96.

<sup>17</sup> Wallace JE, Lemaire JB, Ghali WA. Physician wellness: a missing quality indicator. *Lancet*  
2009;374:1714-21.

<sup>18</sup> Gates DM, Gillespie GL, Succop P. Violence against nurses and its impact on stress and productivity.  
*Nurs Econ* 2011;29:59-66.

<sup>19</sup> Magnavita N. Workplace violence and occupational stress in healthcare workers: a chicken-and-  
egg situation-results of a 6-year follow-up study. *J Nurs Scholarsh* 2014;46:366-76.

<sup>20</sup> Khangura JK, Flodgren G, Perera R, et al. Primary care professionals providing non-urgent care in  
hospital emergency departments. *Cochrane Database Syst Rev* 2012;11:CD002097.

<sup>21</sup> Garnham P: Understanding and dealing with anger, aggression and violence. *Nurs Stand*  
2001;16:37-42.

<sup>22</sup> Hodge AN, Marshall AP: Violence and aggression in the emergency department: a critical care  
perspective. *Aust Crit Care* 2007;20:61-7.

<sup>23</sup> Gates D, Gillespie G, Smith C, et al. Using action research to plan a violence prevention program for  
emergency departments. *J Emerg Nurs* 2011;37:32-9.



- 1  
2  
3  
4  
5 <sup>24</sup> Ramacciati N, Ceccagnoli A, Addey B, et al. Interventions to reduce the risk of violence toward  
6  
7 emergency department staff: current approaches. *Open Access Emerg Med* 2016;8:17-27.  
8  
9 <sup>25</sup> Soremekun OA, Capp R, Biddinger PD, et al. Impact of physician screening in the emergency  
10  
11 department on patient flow. *J Emerg Med* 2012;43:509-15.  
12  
13 <sup>26</sup> Morphet J, Griffiths D, Plummer V, et al. At the crossroads of violence and aggression in the  
14  
15 emergency department: perspectives of Australian emergency nurses. *Aust Health Rev* 2014;38:194-  
16  
17 201.  
18  
19 <sup>27</sup> Weiland TJ, Ivory S, Hutton J. Managing Acute Behavioural Disturbances in the Emergency  
20  
21 Department Using the Environment, Policies and Practices: A Systematic Review. *West J Emerg Med*  
22  
23 2017;18:647-661.  
24  
25 <sup>28</sup> d'Aubarede C, Sarnin P, Cornut PL, et al. Impacts of users' antisocial behaviors in an ophthalmologic  
26  
27 emergencydepartment--a qualitative study. *J Occup Health* 2016;58:96-106.  
28  
29 <sup>29</sup> Touzet S, Cornut PL, Fassier JB, et al. Impact of a program to prevent incivility towards and assault  
30  
31 of healthcare staff in an opthalmological emergency unit: study protocol for the PREVURGO On/Off  
32  
33 trial. *BMC Health Serv Res* 2014;14:221.  
34  
35 <sup>30</sup> Wagner AK, Soumerai SB, Zhang F, et al. Segmented regression analysis of interrupted time series  
36  
37 studies in medication use research. *J Clin Pharm Ther* 2002;27:299-309.  
38  
39 <sup>31</sup> Bernal JL, Cummins S, Gasparrini A. Interrupted time series regression for the evaluation of public  
40  
41 health interventions: a tutorial. *Int J Epidemiol* 2017;46:348-355.  
42  
43 <sup>32</sup> Ogrinc G, Davies L, Goodman D, et al. SQUIRE 2.0 (Standards for QUality Improvement Reporting  
44  
45 Excellence): revised publication guidelines from a detailed consensus process. *BMJ Qual Saf*  
46  
47 2016;25:986-992.  
48  
49 <sup>33</sup> Nikathil S, Olausson A, Gocentas RA, et al. Review article: Workplace violence in the emergency  
50  
51 department: A systematic review and meta analysis. *Emerg Med Australas* 2017;29:265-275.  
52  
53  
54  
55  
56  
57  
58  
59  
60

- 1  
2  
3  
4  
5 <sup>34</sup> Maguire BJ, O'Meara P, O'Neill BJ, et al. Violence against emergency medical services personnel: A  
6  
7 systematic review of the literature. *Am J Ind Med* 2018;61:167-180.  
8  
9 <sup>35</sup> D'Ettorre G, Pellicani V, Mazzotta M, et al. Preventing and managing workplace violence against  
10  
11 healthcare workers in Emergency Departments. *Acta Biomed* 2018;89(4-S):28-36.  
12  
13 <sup>36</sup> Tadros A, Kiefer C. Violence in the Emergency Department: A Global Problem. *Psychiatr Clin North*  
14  
15 *Am* 2017;40:575-584.  
16  
17 <sup>37</sup> Kowalenko T, Gates D, Gillespie GL, et al. Prospective study of violence against ED workers. *Am J*  
18  
19 *Emerg Med* 2013;31:197-205.  
20  
21 <sup>38</sup> Gillespie GL, Gates DM, Kowalenko T, et al. Implementation of a comprehensive intervention to  
22  
23 reduce physical assaults and threats in the emergency department. *J Emerg Nurs* 2014;40:586-91.  
24  
25 <sup>39</sup> Fernandes CM, Raboud JM, Christenson JM, et al. Violence in the Emergency Department Study  
26  
27 (VITES) Group. The effect of an education program on violence in the emergency department. *Ann*  
28  
29 *Emerg Med* 2002;39:47-55.  
30  
31 <sup>40</sup> Gillespie GL, Farra SL, Gates DM. A workplace violence educational program: a repeated measures  
32  
33 study. *Nurse Educ Pract* 2014;14:468-72.  
34  
35 <sup>41</sup> Ramacciati N, Ceccagnoli A, Addey B, et al. Violence towards emergency nurses: A narrative review  
36  
37 of theories and frameworks. *Int Emerg Nurs* 2018;39:2-12.  
38  
39 <sup>42</sup> Copeland D, Henry M. Workplace Violence and Perceptions of Safety Among Emergency  
40  
41 Department Staff Members: Experiences, Expectations, Tolerance, Reporting, and  
42  
43 Recommendations. *J Trauma Nurs* 2017;24:65-77.  
44  
45 <sup>43</sup> Pich J, Hazelton M, Sundin D, et al. Patient-related violence against emergency department nurses.  
46  
47 *Nurs Health Sci* 2010;12:268-74.  
48  
49 <sup>44</sup> Ramsey CR, Matowe L, Grilli R, et al. Interrupted time series designs in health technology  
50  
51 assessment: lessons from two systematic reviews of behaviour change strategies. *Int J Technol Assess*  
52  
53 *Health Care* 2003;19:613-623.  
54  
55  
56  
57  
58  
59  
60

1  
2  
3  
4  
5 <sup>45</sup> Lagarde M. How to do (or not to do) ... Assessing the impact of a policy change with routine  
6  
7 longitudinal data. *Health Policy Plan* 2012;27:76-83.

8  
9 <sup>46</sup> Penfold RB, Zhang. Use of interrupted time series analysis in evaluating health care quality  
10  
11 improvements. *Academic paediatrics* 2003;13:S38-S44.

12  
13  
14 <sup>47</sup> Magnavita N. Violence prevention in a small-scale psychiatric unit. Program planning and  
15  
16 evaluation. *Int J Occup Environ Health* 2011;17(4):336-44.

17  
18 <sup>48</sup> Guével MR, Pommier J. Mixed methods research in public health: issues and illustration. *Sante*  
19  
20 *Publique* 2012;24:23-38.  
21  
22  
23  
24  
25  
26  
27  
28  
29  
30  
31  
32  
33  
34  
35  
36  
37  
38  
39  
40  
41  
42  
43  
44  
45  
46  
47  
48  
49  
50  
51  
52  
53  
54  
55  
56  
57  
58  
59  
60

1  
2  
3  
4  
5  
6  
7  
8  
9  
10  
11  
12  
13  
14  
15  
16  
17  
18  
19  
20  
21  
22  
23  
24  
25  
26  
27  
28  
29  
30  
31  
32  
33  
34  
35  
36  
37  
38  
39  
40  
41  
42  
43  
44  
45  
46  
47  
48  
49  
50  
51  
52  
53  
54  
55  
56  
57  
58  
59  
60



Study flow chart of admissions at Ophthalmology Emergency Department.  
 Legend: Components: A: computerised triage algorithm, BC: signage and messages broadcast on TV in the waiting rooms, D: mediator, E: video surveillance.



Observed time series of the A) rates of admission at OED with acts of violence, B) total number of admissions at OED and C) rates of admissions with waiting time greater than 2 hours by month before and during implementation of the prevention program.

Abbreviation: OED: Ophthalmology Emergency Department

Legend: the grey band represents the 3-month training period. The dotted lines inside the scatter plots represents the implementation of component A (computerised triage algorithm), component BC (signage and messages broadcast on TV in the waiting rooms), component D (mediator) and component E (video surveillance).

209x297mm (300 x 300 DPI)

# Reporting checklist for quality improvement study.

Based on the SQUIRE guidelines.

## Instructions to authors

Complete this checklist by entering the page numbers from your manuscript where readers will find each of the items listed below.

Your article may not currently address all the items on the checklist. Please modify your text to include the missing information. If you are certain that an item does not apply, please write "n/a" and provide a short explanation.

Upload your completed checklist as an extra file when you submit to a journal.

In your methods section, say that you used the SQUIRE reporting guidelines, and cite them as:

Ogrinc G, Davies L, Goodman D, Batalden P, Davidoff F, Stevens D. SQUIRE 2.0 (Standards for QUality Improvement Reporting Excellence): revised publication guidelines from a detailed consensus process

|                     | Reporting Item                                                                                                                                                                                                                      | Page Number |
|---------------------|-------------------------------------------------------------------------------------------------------------------------------------------------------------------------------------------------------------------------------------|-------------|
|                     | #1 Indicate that the manuscript concerns an initiative to improve healthcare (broadly defined to include the quality, safety, effectiveness, patientcenteredness, timeliness, cost, efficiency, and equity of healthcare)           | 1           |
|                     | #02a Provide adequate information to aid in searching and indexing                                                                                                                                                                  | 1           |
|                     | #02b Summarize all key information from various sections of the text using the abstract format of the intended publication or a structured summary such as: background, local problem, methods, interventions, results, conclusions | 1           |
| Problem description | #3 Nature and significance of the local problem                                                                                                                                                                                     | 6           |
| Available knowledge | #4 Summary of what is currently known about the problem, including relevant previous studies                                                                                                                                        | 5           |
| Rationale           | #5 Informal or formal frameworks, models, concepts, and / or theories used to explain the problem, any reasons or                                                                                                                   | 5 - 6       |

|    |                 |                                                                          |          |
|----|-----------------|--------------------------------------------------------------------------|----------|
| 1  |                 | assumptions that were used to develop the intervention(s), and           |          |
| 2  |                 | reasons why the intervention(s) was expected to work                     |          |
| 3  |                 |                                                                          |          |
| 4  | Specific aims   | #6 Purpose of the project and of this report                             | 6        |
| 5  |                 |                                                                          |          |
| 6  | Context         | #7 Contextual elements considered important at the outset of             | 7        |
| 7  |                 | introducing the intervention(s)                                          |          |
| 8  |                 |                                                                          |          |
| 9  |                 |                                                                          |          |
| 10 | Intervention(s) | #08a Description of the intervention(s) in sufficient detail that others | 8        |
| 11 |                 | could reproduce it                                                       |          |
| 12 |                 |                                                                          |          |
| 13 |                 |                                                                          |          |
| 14 |                 | #08b Specifics of the team involved in the work                          | 8        |
| 15 |                 |                                                                          |          |
| 16 | Study of the    | #09a Approach chosen for assessing the impact of the intervention(s)     | 6        |
| 17 | Intervention(s) |                                                                          |          |
| 18 |                 |                                                                          |          |
| 19 |                 |                                                                          |          |
| 20 |                 | #09b Approach used to establish whether the observed outcomes            | 6, 12,13 |
| 21 |                 | were due to the intervention(s)                                          |          |
| 22 |                 |                                                                          |          |
| 23 |                 |                                                                          |          |
| 24 | Measures        | #10a Measures chosen for studying processes and outcomes of the          | 9        |
| 25 |                 | intervention(s), including rationale for choosing them, their            |          |
| 26 |                 | operational definitions, and their validity and reliability              |          |
| 27 |                 |                                                                          |          |
| 28 |                 |                                                                          |          |
| 29 |                 | #10b Description of the approach to the ongoing assessment of            | 9        |
| 30 |                 | contextual elements that contributed to the success, failure,            |          |
| 31 |                 | efficiency, and cost                                                     |          |
| 32 |                 |                                                                          |          |
| 33 |                 |                                                                          |          |
| 34 |                 | #10c Methods employed for assessing completeness and accuracy            | 9        |
| 35 |                 | of data                                                                  |          |
| 36 |                 |                                                                          |          |
| 37 |                 |                                                                          |          |
| 38 | Analysis        | #11a Qualitative and quantitative methods used to draw inferences        | 12,13    |
| 39 |                 | from the data                                                            |          |
| 40 |                 |                                                                          |          |
| 41 |                 |                                                                          |          |
| 42 |                 | #11b Methods for understanding variation within the data, including      | 12,13    |
| 43 |                 | the effects of time as a variable                                        |          |
| 44 |                 |                                                                          |          |
| 45 |                 |                                                                          |          |
| 46 | Ethical         | #12 Ethical aspects of implementing and studying the intervention(s)     | 15,30    |
| 47 | considerations  | and how they were addressed, including, but not limited to,              |          |
| 48 |                 | formal ethics review and potential conflict(s) of interest               |          |
| 49 |                 |                                                                          |          |
| 50 |                 |                                                                          |          |
| 51 |                 | #13a Initial steps of the intervention(s) and their evolution over time  | See note |
| 52 |                 | (e.g., time-line diagram, flow chart, or table), including               | 1        |
| 53 |                 | modifications made to the intervention during the project                |          |
| 54 |                 |                                                                          |          |
| 55 |                 |                                                                          |          |
| 56 |                 | #13b Details of the process measures and outcome                         | 9        |
| 57 |                 |                                                                          |          |
| 58 |                 |                                                                          |          |
| 59 |                 |                                                                          |          |
| 60 |                 |                                                                          |          |

|    |                |      |                                                                   |          |
|----|----------------|------|-------------------------------------------------------------------|----------|
| 1  |                | #13c | Contextual elements that interacted with the intervention(s)      | 15       |
| 2  |                |      |                                                                   |          |
| 3  |                | #13d | Observed associations between outcomes, interventions, and        | 20       |
| 4  |                |      | relevant contextual elements                                      |          |
| 5  |                |      |                                                                   |          |
| 6  |                |      |                                                                   |          |
| 7  |                | #13e | Unintended consequences such as unexpected benefits,              | See note |
| 8  |                |      | problems, failures, or costs associated with the intervention(s). | 2        |
| 9  |                |      |                                                                   |          |
| 10 |                |      |                                                                   |          |
| 11 |                | #13f | Details about missing data                                        | See note |
| 12 |                |      |                                                                   | 3        |
| 13 |                |      |                                                                   |          |
| 14 |                |      |                                                                   |          |
| 15 | Summary        | #14a | Key findings, including relevance to the rationale and specific   | 27       |
| 16 |                |      | aims                                                              |          |
| 17 |                |      |                                                                   |          |
| 18 |                | #14b | Particular strengths of the project                               | 27       |
| 19 |                |      |                                                                   |          |
| 20 |                |      |                                                                   |          |
| 21 | Interpretation | #15a | Nature of the association between the intervention(s) and the     | 27       |
| 22 |                |      | outcomes                                                          |          |
| 23 |                |      |                                                                   |          |
| 24 |                | #15b | Comparison of results with findings from other publications       | 27       |
| 25 |                |      |                                                                   |          |
| 26 |                |      |                                                                   |          |
| 27 |                | #15c | Impact of the project on people and systems                       | 27       |
| 28 |                |      |                                                                   |          |
| 29 |                | #15d | Reasons for any differences between observed and anticipated      | 22       |
| 30 |                |      | outcomes, including the influence of context                      |          |
| 31 |                |      |                                                                   |          |
| 32 |                |      |                                                                   |          |
| 33 |                | #15e | Costs and strategic trade-offs, including opportunity costs       | See note |
| 34 |                |      |                                                                   | 4        |
| 35 |                |      |                                                                   |          |
| 36 |                |      |                                                                   |          |
| 37 | Limitations    | #16a | Limits to the generalizability of the work                        | 28       |
| 38 |                |      |                                                                   |          |
| 39 |                | #16b | Factors that might have limited internal validity such as         | 28       |
| 40 |                |      | confounding, bias, or imprecision in the design, methods,         |          |
| 41 |                |      | measurement, or analysis                                          |          |
| 42 |                |      |                                                                   |          |
| 43 |                |      |                                                                   |          |
| 44 |                | #16c | Efforts made to minimize and adjust for limitations               | 28       |
| 45 |                |      |                                                                   |          |
| 46 |                |      |                                                                   |          |
| 47 | Conclusion     | #17a | Usefulness of the work                                            | 29       |
| 48 |                |      |                                                                   |          |
| 49 |                | #17b | Sustainability                                                    | 29       |
| 50 |                |      |                                                                   |          |
| 51 |                |      |                                                                   |          |
| 52 |                | #17c | Potential for spread to other contexts                            | 28       |
| 53 |                |      |                                                                   |          |
| 54 |                | #17d | Implications for practice and for further study in the field      | 29       |
| 55 |                |      |                                                                   |          |
| 56 |                | #17e | Suggested next steps                                              | 29       |
| 57 |                |      |                                                                   |          |
| 58 |                |      |                                                                   |          |
| 59 |                |      |                                                                   |          |
| 60 |                |      |                                                                   |          |



|   |         |     |                                                                   |    |
|---|---------|-----|-------------------------------------------------------------------|----|
| 1 | Funding | #18 | Sources of funding that supported this work. Role, if any, of the | 30 |
| 2 |         |     | funding organization in the design, implementation,               |    |
| 3 |         |     | interpretation, and reporting                                     |    |
| 4 |         |     |                                                                   |    |
| 5 |         |     |                                                                   |    |
| 6 |         |     |                                                                   |    |

## Author notes

1. 8, figure 1
2. n/a (not measured)
3. n/a (self-reported)
4. n/a (not measured)

The SQUIRE 2.0 checklist is distributed under the terms of the Creative Commons Attribution License CC BY-NC 4.0. This checklist was completed on 12. April 2019 using <https://www.goodreports.org/>, a tool made by the [EQUATOR Network](#) in collaboration with [Penelope.ai](#)
